# Supplementary material for: Identifying WHO global priority endemic pathogens for vaccine research and development (R&D) using multi-criteria decision analysis (MCDA): an objective of the Immunization Agenda 2030
Source: PubMed Central journal article supplement (PMC11663754; doi:10.1016/j.ebiom.2024.105424), 2024-11-11
Supplement: mmc1.pdf [file mmc1.pdf]

## **Title**

# **Identifying WHO global priority endemic pathogens for vaccine research and development (R&D) using multi-criteria decision analysis (MCDA): an objective of the Immunization Agenda 2030**

## **Appendix**

### Contents

|                                                                                                          |    |
|----------------------------------------------------------------------------------------------------------|----|
| Interim reports, including detailed methods .....                                                        | 5  |
| Pathogens identified through literature review .....                                                     | 6  |
| Survey preparation .....                                                                                 | 7  |
| Pilot testing .....                                                                                      | 7  |
| Pathogen scoring .....                                                                                   | 8  |
| Pathogen scores by region .....                                                                          | 10 |
| Survey dissemination .....                                                                               | 17 |
| Dissemination channels .....                                                                             | 17 |
| Survey Invitation.....                                                                                   | 18 |
| Survey components.....                                                                                   | 23 |
| Survey introduction.....                                                                                 | 23 |
| PAPRIKA survey questions.....                                                                            | 26 |
| Post-survey information.....                                                                             | 28 |
| Survey participants.....                                                                                 | 31 |
| Survey results.....                                                                                      | 34 |
| Criteria weights.....                                                                                    | 34 |
| Pathogen ranks by region.....                                                                            | 35 |
| Use Cases and Action Categories .....                                                                    | 38 |
| Detailed methods for assessing predictors and cluster patterns in MCDA-generated criteria weights .....  | 41 |
| Detailed results from assessing predictors and cluster patterns in MCDA-generated criteria weights ..... | 43 |
| References.....                                                                                          | 69 |

## Tables

|           |                                                                       |    |
|-----------|-----------------------------------------------------------------------|----|
| sTable 1  | Pathogens considered for vaccine R&D prioritization.....              | 6  |
| sTable 2  | Pathogen scoring guide .....                                          | 8  |
| sTable 3  | Coding for data availability .....                                    | 10 |
| sTable 4  | Pathogen scores, African Region .....                                 | 11 |
| sTable 5  | Pathogen scores, Region of the Americas .....                         | 12 |
| sTable 6  | Pathogen scores, Eastern Mediterranean Region .....                   | 13 |
| sTable 7  | Pathogen scores, European Region .....                                | 14 |
| sTable 8  | Pathogen scores, South-East Asian Region.....                         | 15 |
| sTable 9  | Pathogen scores, Western Pacific Region .....                         | 16 |
| sTable 10 | Regional and country representation in included survey responses..... | 31 |
| sTable 11 | Characteristics of survey participants.....                           | 32 |
| sTable 12 | Raw mean criteria weights .....                                       | 34 |
| sTable 13 | Pathogen total weights and ranks by region.....                       | 35 |
| sTable 14 | Robustness testing results.....                                       | 37 |
| sTable 15 | Use cases and Action Categories for pathogens on the Global list..... | 38 |

## Figures

|            |                                                                                                                                                            |    |
|------------|------------------------------------------------------------------------------------------------------------------------------------------------------------|----|
| sFigure 1  | Pilot testing results.....                                                                                                                                 | 7  |
| sFigure 2  | Survey dissemination.....                                                                                                                                  | 17 |
| sFigure 3  | Survey invitation: Example email to immunization stakeholders.....                                                                                         | 18 |
| sFigure 4  | Survey invitation: Example email attachment.....                                                                                                           | 20 |
| sFigure 5  | Survey introduction.....                                                                                                                                   | 23 |
| sFigure 6  | Example Survey Question.....                                                                                                                               | 26 |
| sFigure 7  | Calculating total weight for a pathogen.....                                                                                                               | 27 |
| sFigure 8  | Post-survey information (demo survey).....                                                                                                                 | 28 |
| sFigure 9  | Survey responses.....                                                                                                                                      | 31 |
| sFigure 10 | Adjusted mean difference in criteria weights by region, Criteria 1-4 (n=273).....                                                                          | 43 |
| sFigure 11 | Adjusted mean difference in criteria weights by region, Criteria 5-8 (n=273).....                                                                          | 44 |
| sFigure 12 | Adjusted mean difference in criteria weights by language of survey, Criteria 1-4 (n=273).....                                                              | 45 |
| sFigure 13 | Adjusted mean difference in criteria weights by language of survey, Criteria 5-8 (n=273).....                                                              | 46 |
| sFigure 14 | Adjusted mean difference in criteria weights by participant characteristics: Years of experience (n=273).....                                              | 47 |
| sFigure 15 | Adjusted mean difference in criteria weights by participant characteristics: Areas of expertise and Annual deaths in children under 5 years (n=273).....   | 48 |
| sFigure 16 | Adjusted mean difference in criteria weights by participant characteristics: Areas of expertise and Annual deaths in people 5 years and older (n=273)..... | 49 |
| sFigure 17 | Adjusted mean difference in criteria weights by participant characteristics: Areas of expertise and Years lived with disability (n=273).....               | 50 |
| sFigure 18 | Adjusted mean difference in criteria weights by participant characteristics: Areas of expertise and Social and economic burden per case (n=273).....       | 51 |
| sFigure 19 | Adjusted mean difference in criteria weights by participant characteristics: Areas of expertise and Disruption due to outbreaks (n=273).....               | 52 |
| sFigure 20 | Adjusted mean difference in criteria weights by participant characteristics: Areas of expertise and Contribution to inequity (n=273).....                  | 53 |

|            |                                                                                                                                                                   |    |
|------------|-------------------------------------------------------------------------------------------------------------------------------------------------------------------|----|
| sFigure 21 | Adjusted mean difference in criteria weights by participant characteristics: Areas of expertise and Contribution to antimicrobial resistance (n=273).....         | 54 |
| sFigure 22 | Adjusted mean difference in criteria weights by participant characteristics: Areas of expertise and Unmet needs for prevention and treatment (n=273).....         | 55 |
| sFigure 23 | Adjusted mean difference in criteria weights by participant characteristics: Type of work organisation and Annual deaths in children under 5 years (n=273).....   | 56 |
| sFigure 24 | Adjusted mean difference in criteria weights by participant characteristics: Type of work organisation and Annual deaths in people 5 years and older (n=273)..... | 57 |
| sFigure 25 | Adjusted mean difference in criteria weights by participant characteristics: Type of work organisation and Years lived with disability (n=273).....               | 58 |
| sFigure 26 | Adjusted mean difference in criteria weights by participant characteristics: Type of work organisation and Social and economic burden per case (n=273).....       | 59 |
| sFigure 27 | Adjusted mean difference in criteria weights by participant characteristics: Type of work organisation and Disruption due to outbreaks (n=273).....               | 60 |
| sFigure 28 | Adjusted mean difference in criteria weights by participant characteristics: Type of work organisation and Contribution to inequity (n=273).....                  | 61 |
| sFigure 29 | Adjusted mean difference in criteria weights by participant characteristics: Type of work organisation and Contribution to antimicrobial resistance (n=273).....  | 62 |
| sFigure 30 | Adjusted mean difference in criteria weights by participant characteristics: Type of work organisation and Unmet needs for prevention and treatment (n=273).....  | 63 |
| sFigure 31 | Adjusted mean difference in criteria weights by participant characteristics: Gavi eligibility of participants' country of work (n=273).....                       | 64 |
| sFigure 32 | Adjusted mean difference in criteria weights by participant characteristics: World Bank classification of participants' country of work (n=273).....              | 65 |
| sFigure 33 | Criteria weights by cluster (2-cluster model) (n=273).....                                                                                                        | 66 |
| sFigure 34 | Participant Factors associated with cluster membership, Years of experience and Areas of expertise .....                                                          | 67 |
| sFigure 35 | Participant Factors associated with cluster membership, Type of work organization and Country of work .....                                                       | 68 |



## Interim reports, including detailed methods

Full descriptions of the method, including scoring process, pathogen scores, and data sources are given in the following reports:

- *Vaccine R&D Priorities: Initial Landscaping and Proposed Methods, for PDVAC input.* July 2022. Available at: <https://www.technet-21.org/en/resources/report/vaccine-r-d-priorities-initial-landscaping-and-proposed-methods-for-pdvac-input>
- *Vaccine R&D Priorities: Survey Preparation and Launch, for PDVAC input.* November 2022. Available at: <https://www.technet-21.org/en/resources/report/vaccine-r-d-priorities-survey-preparation-and-launch-for-pdvac-input-includes-pathogen-scoring>
- *Vaccine R&D Priorities: Survey Progress and Preliminary Results, for SAGE input.* February 2023. Available at: <https://www.technet-21.org/en/resources/report/vaccine-r-d-priorities-survey-progress-and-preliminary-results-for-sage-input-2>
- *Vaccine R&D Priorities: Update on Pathogen Scope and Scoring.* March 2024. Available at: <https://www.technet-21.org/en/resources/report/vaccine-r-d-priorities-update-on-pathogen-scope-and-scoring-march-2024>
- *Vaccine R&D Priorities: Vaccine Use Cases and Action Categories, for PDVAC input.* December 2023. Available at: <https://www.technet-21.org/en/resources/report/vaccine-r-d-priorities-vaccine-use-cases-and-action-categories-for-pdvac-input-december-2024>

## Pathogens identified through literature review

Potential pathogens for vaccine R&D are shown in sTable 1. In this list, antibiotic resistance was not considered separately: for example, *Neisseria gonorrhoeae* would include cephalosporin and fluoroquinolone-resistant strains as well as susceptible strains. When divergent product profiles apply to a single pathogen, such as seasonal and broadly protective influenza vaccines, or tuberculosis vaccines for adults and adolescents, rather than infants, they were captured separately. Finally, some entries are not pathogens but diseases: these reflect the nomenclature used in the source materials. Several screens were applied to focus the MCDA exercise on the most relevant pathogens. These screens, and the pathogens eliminated by each one, are also shown in sTable 1.

**sTable 1 Pathogens considered for vaccine R&D prioritization**

| Include in MCDA exercise                                                                                                                                                                                                                                                                                                                                                                                                                                                                                                                                                                                                                                                                                                                                                                                                                                                                                 | Exclude, not considered a human pathogen or disease                                                                                                                                                                                                                                                                                                                                                                                                                                            | Exclude, emerging infectious disease addressed by the R&D Blueprint                                                                                                                         | Exclude, has licensed vaccines for main target product profile(s)                                                                                                                                                                                                                                                                                                                                                                                                                                                                                                                                                                                                                                                                                                                                                                                                          | Exclude, no candidate vaccines identified in clinical development                                                                                                                                                                                                                                                                                                                                                                                                                                                                                                                                                                                                                                                                                                                                                                                                                                                               | Exclude, vaccine R&D not prioritized by global strategies or advisory mechanisms, not suggested by regional stakeholders                                                                                                                                                                                                                                                                                                                                                                                                                                                                                                                                                                                                                                                                                    |
|----------------------------------------------------------------------------------------------------------------------------------------------------------------------------------------------------------------------------------------------------------------------------------------------------------------------------------------------------------------------------------------------------------------------------------------------------------------------------------------------------------------------------------------------------------------------------------------------------------------------------------------------------------------------------------------------------------------------------------------------------------------------------------------------------------------------------------------------------------------------------------------------------------|------------------------------------------------------------------------------------------------------------------------------------------------------------------------------------------------------------------------------------------------------------------------------------------------------------------------------------------------------------------------------------------------------------------------------------------------------------------------------------------------|---------------------------------------------------------------------------------------------------------------------------------------------------------------------------------------------|----------------------------------------------------------------------------------------------------------------------------------------------------------------------------------------------------------------------------------------------------------------------------------------------------------------------------------------------------------------------------------------------------------------------------------------------------------------------------------------------------------------------------------------------------------------------------------------------------------------------------------------------------------------------------------------------------------------------------------------------------------------------------------------------------------------------------------------------------------------------------|---------------------------------------------------------------------------------------------------------------------------------------------------------------------------------------------------------------------------------------------------------------------------------------------------------------------------------------------------------------------------------------------------------------------------------------------------------------------------------------------------------------------------------------------------------------------------------------------------------------------------------------------------------------------------------------------------------------------------------------------------------------------------------------------------------------------------------------------------------------------------------------------------------------------------------|-------------------------------------------------------------------------------------------------------------------------------------------------------------------------------------------------------------------------------------------------------------------------------------------------------------------------------------------------------------------------------------------------------------------------------------------------------------------------------------------------------------------------------------------------------------------------------------------------------------------------------------------------------------------------------------------------------------------------------------------------------------------------------------------------------------|
| Chikungunya virus<br><i>Chlamydia trachomatis</i><br>Cytomegalovirus<br>Dengue virus<br>Extra-intestinal pathogenic <i>E coli</i> (ExPEC)<br>Group A streptococcus ( <i>Streptococcus pyogenes</i> , GAS)<br>Group B streptococcus ( <i>Streptococcus agalactiae</i> , GBS)<br>Hepatitis C<br>Herpes simplex types 1 and 2<br>Human immunodeficiency virus 1 (HIV-1)<br>Hookworm<br>Influenza virus (broadly protective vaccines)<br>Intestinal pathogenic <i>E coli</i> (InPEC)<br><i>Klebsiella pneumoniae</i><br><i>Leishmania</i> species<br><i>Mycobacterium leprae</i><br><i>Mycobacterium tuberculosis</i> (beyond infancy)<br><i>Neisseria gonorrhoeae</i><br>Norovirus<br><i>Plasmodium falciparum</i><br>Respiratory syncytial virus (RSV)<br><i>Salmonella</i> (non-typhoidal, NTS)<br><i>Salmonella</i> Paratyphi<br>Schistosomes<br><i>Shigella</i> species<br><i>Staphylococcus aureus</i> | Bovine coronavirus<br>Bovine respiratory disease<br>Brucellosis<br>Chronic wasting disease<br>Coccidiosis<br>Contagious Bovine Pleuropneumonia (CBPP)<br><i>E coli</i> (cattle infections)<br>Echinococcosis (type not specified)<br>Foot-and-mouth disease virus<br>Gallid alpha herpesvirus 2<br>Peste des petits ruminants<br>Porcine epidemic diarrhea virus<br>Porcine influenza A<br><i>Staphylococcus aureus</i> (dairy cattle)<br><i>Theileria parva</i><br>Tick infestation (animals) | Crimean-Congo haemorrhagic fever<br>Lassa fever virus<br>Marburg virus<br>MERS-CoV<br>Nipah virus<br>Rift Valley Fever virus<br>SARS-CoV-1<br>SARS-CoV-2 (broadly protective)<br>Zika virus | Adenovirus<br><i>Bacillus anthracis</i><br><i>Bordetella pertussis</i><br><i>Clostridium tetani</i><br><i>Corynebacterium diphtheriae</i><br><i>Coxiella burnetii</i> (Q fever)<br>Dengue virus (for dengue-immune individuals)<br>Ebola virus<br>Enterovirus 71<br><i>Haemophilus influenzae</i> type B<br>Hepatitis A and B<br>Human papillomavirus<br>Influenza virus (avian, pandemic, and seasonal)<br>Japanese encephalitis<br>Junin virus<br>Measles virus<br>Mumps virus<br><i>Mycobacterium tuberculosis</i> (BCG for infants)<br><i>Neisseria meningitidis</i> serogroups A, B, C, W, X, Y<br>Polio virus<br>Rabies virus<br>Rotavirus<br>Rubella virus<br><i>Salmonella</i> Typhi<br>SARS-CoV-2<br>Smallpox virus<br><i>Streptococcus pneumoniae</i><br>Tick-borne encephalitis virus<br>Varicella zoster virus<br><i>Vibrio cholerae</i><br>Yellow fever virus | <i>Acinetobacter baumannii</i><br><i>Ascaris lumbricooides</i><br>Aspergillus<br><i>Burkholderia pseudomallei</i><br><i>Cryptococcus</i> species<br>Cryptosporidium<br><i>Dracunculus medinensis</i><br><i>Echinococcus granulosus</i><br><i>Echinococcus multilocularis</i><br>Ehrlichiosis<br><i>Enterococcus faecium</i><br><i>Haemophilus influenzae</i> type A<br><i>Helicobacter pylori</i><br>Hepatitis D virus<br>Human T-lymphotropic virus type 1<br>Lymphatic filariasis<br>Mycetoma<br><i>Mycobacterium ulcerans</i><br><i>Onchocerca volvulus</i><br><i>Pseudomonas aeruginosa</i><br><i>Sarcoptes scabiei</i><br><i>Streptococcus mutans</i><br><i>Strongyloides stercoralis</i><br><i>Toxoplasma gondii</i><br><i>Treponema pallidum</i><br><i>Treponema pallidum subspecies pertenue</i><br><i>Trichomonas vaginalis</i><br><i>Trichuris trichiura</i><br><i>Trypanosoma brucei</i><br><i>Trypanosoma cruzi</i> | <i>Borrelia burgdorferi</i><br>Campylobacter<br><i>Candida</i> species<br><i>Clostridium botulinum</i><br><i>Clostridium difficile</i><br>Coccidioides (Valley fever/coccidioidomycosis)<br>Coxsackievirus Group B<br>Epstein-Barr virus<br>Equine encephalitis virus (Eastern, Venezuelan, and Western)<br><i>Francisella tularensis</i><br><i>Haemophilus influenzae</i> non-type B<br>Hanta viruses (including Hantaan and Puumala)<br>Henipavirus<br>Hepatitis E virus<br>Human metapneumovirus<br>Human parainfluenza virus types 1, 2 and 3<br>Leptospirosis<br><i>Listeria monocytogenes</i><br>Monkeypox virus<br><i>Mycobacterium avium</i> subspecies paratuberculosis<br>Parvovirus<br><i>Plasmodium vivax</i><br>Ross River Virus<br><i>Taenia solium</i><br>West Nile Virus<br>Yersinia pestis |

## Survey preparation

### Pilot testing

A pilot version of the survey was developed in July 2022 as described on page 32 of *Vaccine R&D Priorities: Initial Landscaping and Proposed Methods, for PDVAC input*. (Available at: <https://www.technet-21.org/en/resources/report/vaccine-r-d-priorities-initial-landscaping-and-proposed-methods-for-pdvac-input>)

The pilot survey was shared with PDVAC members in advance of the 18 July 2022 PDVAC meeting. Results of the pilot are shown in sFigure 1. Participant feedback shared during the meeting was incorporated in the final surveys.

**sFigure 1 Pilot testing results**

36 individuals were invited to participate in pilot and 28 of them (78%) opened the link to the pilot survey.

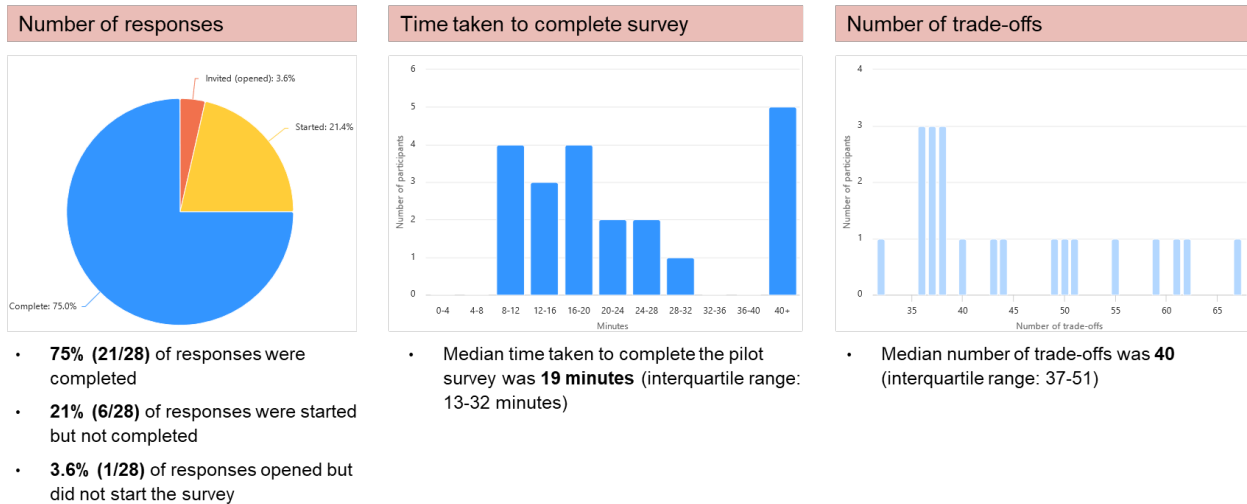

### Participant feedback

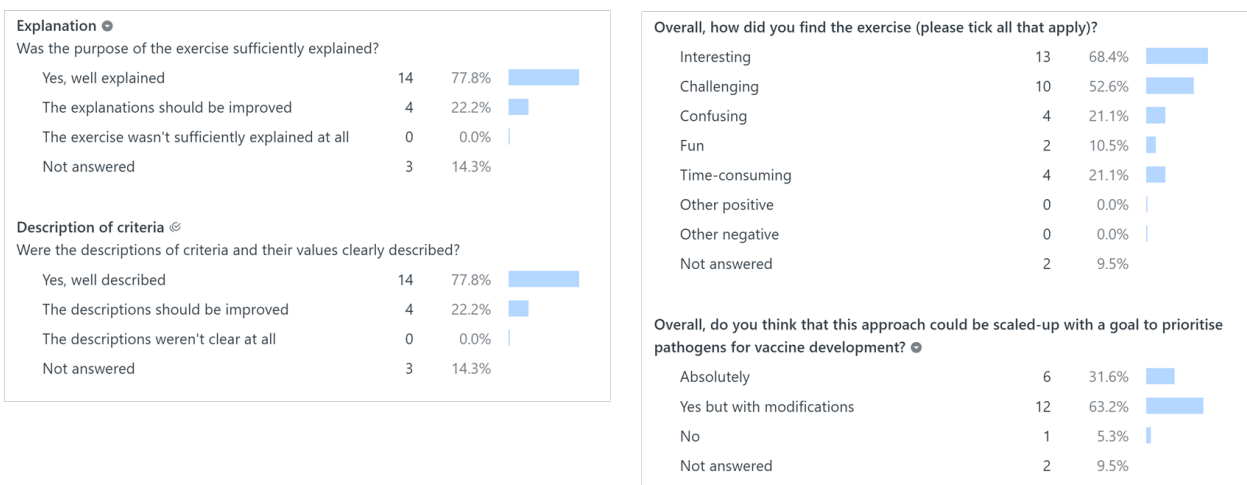

## Pathogen scoring

Pathogens were scored as described in the Methods section using a scoring guide (sTable 2).

**sTable 2 Pathogen scoring guide**

Thresholds for quantitative criteria (1-3) were set based on the highest burden in each region caused by a pathogen in the scope of this exercise (As recommended by PDVAC, HIV-1, *M tuberculosis*, and *P falciparum* were excluded from threshold-setting to improve discrimination at the lower levels).

| Criteria / Sub-criteria                     | Very low                                                                                                     | Low                                                                                                              | Medium                                                                                                             | High                                                                                                         | Very high                                                                                                    |
|---------------------------------------------|--------------------------------------------------------------------------------------------------------------|------------------------------------------------------------------------------------------------------------------|--------------------------------------------------------------------------------------------------------------------|--------------------------------------------------------------------------------------------------------------|--------------------------------------------------------------------------------------------------------------|
| 1 Annual deaths in children under 5         | Less than 20% of highest regional burden                                                                     | 20% - 40% of highest regional burden                                                                             | 40% - 60% of highest regional burden                                                                               | 60% - 80% of highest regional burden                                                                         | Greater than 80% of highest regional burden                                                                  |
| 2 Annual deaths in people older than 5      | Less than 20% of highest regional burden                                                                     | 20% - 40% of highest regional burden                                                                             | 40% - 60% of highest regional burden                                                                               | 60% - 80% of highest regional burden                                                                         | Greater than 80% of highest regional burden                                                                  |
| 3 Years lived with disability (all ages)    | Less than 20% of highest regional burden                                                                     | 20% - 40% of highest regional burden                                                                             | 40% - 60% of highest regional burden                                                                               | 60% - 80% of highest regional burden                                                                         | Greater than 80% of highest regional burden                                                                  |
| 4 Social and economic burden per case       | Very low burden on families and societies                                                                    | Low burden on families and societies                                                                             | Moderate burden on families and societies                                                                          | High burden on families and societies                                                                        | Very high burden on families and societies                                                                   |
| 4.1 Economic burden to families             | <i>Rarely leads to hospitalization or very low cost of treatment<br/>Little or no losses of productivity</i> | <i>Seldom requires hospitalization or low cost of treatment<br/>Minor losses of productivity</i>                 | <i>Sometimes requires hospitalization or moderate cost of treatment<br/>Some losses of productivity</i>            | <i>Often requires hospitalization or high cost of treatment<br/>Moderate losses of productivity</i>          | <i>Typically requires hospitalization or very high cost of treatment<br/>Serious losses of productivity</i>  |
| 4.2 Social burden to families               | <i>Little or no impact on education or social well-being (e.g. due to stigma)</i>                            | <i>Minor impact on education or social well-being (e.g. due to stigma)</i>                                       | <i>Some impact on education or social well-being (e.g. due to stigma)</i>                                          | <i>Moderate impact on education or well-being (e.g. due to stigma)</i>                                       | <i>Serious impact on education or social well-being (e.g. due to stigma)</i>                                 |
| 5 Disruption due to outbreaks and epidemics | Little or no social disruption or impact on healthcare, trade or tourism                                     | Slight social disruption or impact on healthcare, trade or tourism                                               | Moderate social disruption or impact on healthcare, trade or tourism                                               | High social disruption or impact on healthcare, trade or tourism, including due to preventive measures       | Very high social disruption or impact on healthcare, trade and tourism, including due to preventive measures |
| 6 Contribution to inequity                  | Affects all communities equally                                                                              | Burden falls on socially and economically disadvantaged groups, including women, slightly more than other groups | Burden falls on socially and economically disadvantaged groups, including women, moderately more than other groups | Burden falls on socially and economically disadvantaged groups, including women, much more than other groups | Burden falls on socially and economically disadvantaged groups, including women, all or most of the time     |

| <b>Criteria / Sub-criteria</b>                   | <b>Very low</b>                                                             | <b>Low</b>                                                                            | <b>Medium</b>                                                                           | <b>High</b>                                                                         | <b>Very high</b>                                                                                    |
|--------------------------------------------------|-----------------------------------------------------------------------------|---------------------------------------------------------------------------------------|-----------------------------------------------------------------------------------------|-------------------------------------------------------------------------------------|-----------------------------------------------------------------------------------------------------|
| 7 Contribution to antimicrobial resistance (AMR) | Not resistant to first-line drugs and not associated with antimicrobial use | Little resistance to first-line drugs and little association with antimicrobial use   | Some resistance to first-line drugs, associated with high antimicrobial use             | Significant resistance to first-line drugs, associated with high antimicrobial use  | A global resistance threat due to widespread resistance and association with high antimicrobial use |
| 7.1 AMR Priority                                 | <i>The pathogen has not been highlighted as a priority for AMR</i>          | <i>The pathogen has not been highlighted as a priority for AMR</i>                    | <i>The pathogen has been highlighted as a country priority for AMR</i>                  | <i>The pathogen has been highlighted as a regional priority for AMR</i>             | <i>The pathogen has been highlighted as a high or critical global priority for AMR</i>              |
| 7.2 Frequency of resistance                      | <i>Very few isolates are resistant to first-line antimicrobial drugs</i>    | <i>A low proportion of isolates is resistant to first-line antimicrobial drugs</i>    | <i>A moderate proportion of isolates is resistant to first-line antimicrobial drugs</i> | <i>A high proportion of isolates is resistant to first-line antimicrobial drugs</i> | <i>A high proportion of global isolates is resistant to first-line antimicrobial drugs</i>          |
| 7.3 Antibiotic use                               | <i>Low antimicrobial use is associated with infection by the pathogen</i>   | <i>Moderate or low antimicrobial use is associated with infection by the pathogen</i> | <i>High antimicrobial use is associated with infection by the pathogen</i>              | <i>High antimicrobial use is associated with infection by the pathogen</i>          | <i>High antimicrobial use is associated with infection by the pathogen</i>                          |
| 8 Unmet needs for prevention and treatment       | The alternatives for prevention or treatment meet the needs of most people  | The alternatives for prevention or treatment meet the needs of many people            | The alternatives for prevention or treatment meet the needs of some people              | The alternatives for prevention or treatment meet the needs of few people           | There are no effective alternatives for prevention or treatment                                     |

### ***Pathogen scores by region***

Pathogens were scored in the context of each region as described in the Methods section. For transparency, scores were coded for data availability as shown in sTable 3. Scores as of April 2024 are shown in sTable 4 to sTable 9.

**sTable 3      Coding for data availability**

|                      | <b>Criteria</b>                                      | <b>Coding</b>                                                                                                                                                                                                                                                                                                                                                                                                                                                                   |
|----------------------|------------------------------------------------------|---------------------------------------------------------------------------------------------------------------------------------------------------------------------------------------------------------------------------------------------------------------------------------------------------------------------------------------------------------------------------------------------------------------------------------------------------------------------------------|
| Quantitative scoring | <i>Annual deaths in children under 5</i>             | A. Scored using burden data from GBD 2019                                                                                                                                                                                                                                                                                                                                                                                                                                       |
|                      | <i>Annual deaths in people 5 and older</i>           | B. Scored using burden data from other studies                                                                                                                                                                                                                                                                                                                                                                                                                                  |
|                      | <i>Annual years lived with disability (all ages)</i> | C. Systematic data not found, scored as discussed in <i>Vaccine R&amp;D Priorities: Survey Preparation and Launch, for PDVAC input</i> . November 2022. Available at: <a href="https://www.technet-21.org/en/resources/report/vaccine-r-d-priorities-survey-preparation-and-launch-for-pdvac-input-includes-pathogen-scoring">https://www.technet-21.org/en/resources/report/vaccine-r-d-priorities-survey-preparation-and-launch-for-pdvac-input-includes-pathogen-scoring</a> |
| Qualitative scoring  | <i>Social and economic burden per case</i>           | A. Scored based on data from regional sources                                                                                                                                                                                                                                                                                                                                                                                                                                   |
|                      | <i>Disruption due to outbreaks</i>                   | B. Score inferred based on data for other regions or other pathogens in the same region                                                                                                                                                                                                                                                                                                                                                                                         |
|                      | <i>Contribution to inequity</i>                      |                                                                                                                                                                                                                                                                                                                                                                                                                                                                                 |
|                      | <i>Contribution to antimicrobial resistance</i>      |                                                                                                                                                                                                                                                                                                                                                                                                                                                                                 |
|                      | <i>Unmet needs for prevention &amp; treatment</i>    |                                                                                                                                                                                                                                                                                                                                                                                                                                                                                 |

**sTable 4 Pathogen scores, African Region**

A, B, and C codes refer to the level of data available for scoring, as shown in sTable 3.

|                                           | 1 Annual deaths in children under 5 | 2 Annual deaths in people 5 and older | 3 Annual years lived with disability (all ages) | 4 Social and economic burden per case | 5 Disruption due to outbreaks | 6 Contribution to inequity | 7 Contribution to antimicrobial resistance | 8 Unmet needs for prevention & treatment |
|-------------------------------------------|-------------------------------------|---------------------------------------|-------------------------------------------------|---------------------------------------|-------------------------------|----------------------------|--------------------------------------------|------------------------------------------|
| Chikungunya virus                         | Very low (B)                        | Very low (B)                          | Very low (B)                                    | Medium (A)                            | Medium (A)                    | Medium (A)                 | Very Low (A)                               | Very high (A)                            |
| <i>Chlamydia trachomatis</i>              | Very low (A)                        | Very low (A)                          | Very low (A)                                    | Very high (A)                         | Very low (B)                  | High (A)                   | Low (A)                                    | High (A)                                 |
| Cytomegalovirus                           | Very low (C)                        | Low (C)                               | Medium (C)                                      | High (B)                              | Very low (B)                  | Medium (A)                 | Very low (B)                               | Very high (B)                            |
| Dengue virus                              | Very low (A)                        | Very low (A)                          | Very low (A)                                    | Medium (B)                            | Medium (A)                    | Medium (B)                 | Medium (B)                                 | High (A)                                 |
| Extra-intestinal pathogenic <i>E coli</i> | Medium (A)                          | High (A)                              | Very low (A)                                    | Medium (B)                            | Low (B)                       | Medium (A)                 | Very high (A)                              | Medium (A)                               |
| Group A streptococcus                     | Very low (A)                        | Low (A)                               | Medium (A)                                      | High (A)                              | Very low (B)                  | High (B)                   | High (B)                                   | High (A)                                 |
| Group B streptococcus                     | High (A)                            | Low (A)                               | Very low (A)                                    | High (A)                              | Low (B)                       | Medium (A)                 | Low (A)                                    | Very high (A)                            |
| Hepatitis C virus                         | Very low (A)                        | Medium (A)                            | Very low (A)                                    | Very high (A)                         | Low (B)                       | Very high (A)              | Low (B)                                    | High (A)                                 |
| Herpes simplex types 1 and 2              | Very low (C)                        | Very low (C)                          | Very low (A)                                    | Very high (A)                         | Very low (B)                  | Very high (A)              | Low (A)                                    | High (A)                                 |
| Hookworm                                  | Very low (C)                        | Very low (C)                          | Medium (A)                                      | Low (A)                               | Very low (B)                  | Very high (A)              | Low (A)                                    | Low (A)                                  |
| HIV-1                                     | Low (A)                             | Very high (A)                         | Very high (A)                                   | Very high (A)                         | High (A)                      | Very high (A)              | Very high (A)                              | High (A)                                 |
| Influenza                                 | Very low (A)                        | Low (A)                               | Very low (A)                                    | Low (B)                               | Very high (A)                 | Medium (B)                 | Medium (B)                                 | High (A)                                 |
| Intestinal pathogenic <i>E coli</i>       | Very low (A)                        | Very low (A)                          | Very low (A)                                    | Medium (A)                            | Medium (B)                    | Medium (A)                 | Very high (A)                              | Medium (A)                               |
| <i>Klebsiella pneumoniae</i>              | Very high (A)                       | Very high (A)                         | Very low (A)                                    | High (B)                              | Low (A)                       | Low (B)                    | Very high (A)                              | High (A)                                 |
| <i>Leishmania</i>                         | Very low (A)                        | Very low (A)                          | Very low (A)                                    | Very high (B)                         | High (A)                      | Very high (A)              | Medium (A)                                 | Medium (A)                               |
| <i>Mycobacterium leprae</i> (leprosy)     | Very low (C)                        | Very low (C)                          | Very low (A)                                    | Very high (A)                         | Very low (A)                  | Very high (B)              | Low (A)                                    | High (A)                                 |
| <i>Mycobacterium tuberculosis</i>         | Low (B)                             | Very high (B)                         | Very high (A)                                   | Very high (A)                         | Very high (A)                 | Very high (A)              | Very high (A)                              | High (A)                                 |
| <i>Neisseria gonorrhoeae</i>              | Very low (A)                        | Very low (A)                          | Very low (A)                                    | Medium (B)                            | Low (B)                       | High (A)                   | Very high (A)                              | Medium (A)                               |
| Non-typhoidal <i>Salmonella</i>           | High (A)                            | Low (A)                               | Very low (A)                                    | High (A)                              | Medium (B)                    | Very high (A)              | High (A)                                   | High (A)                                 |
| Norovirus                                 | Low (A)                             | Low (A)                               | Very low (A)                                    | Medium (A)                            | High (A)                      | Medium (A)                 | Low (B)                                    | High (A)                                 |
| <i>Plasmodium falciparum</i> (malaria)    | Very high (C)                       | Very high (C)                         | Very high (C)                                   | High (A)                              | High (A)                      | Very high (A)              | High (A)                                   | High (A)                                 |
| Respiratory syncytial virus               | High (A)                            | Low (A)                               | Very low (A)                                    | Medium (B)                            | High (A)                      | Medium (B)                 | High (B)                                   | Medium (A)                               |
| <i>Salmonella</i> Paratyphi               | Very low (A)                        | Very low (A)                          | Very low (A)                                    | Low (B)                               | Low (A)                       | High (B)                   | Low (B)                                    | Medium (B)                               |
| Schistosomes                              | Very low (A)                        | Very low (A)                          | Very high (A)                                   | Medium (A)                            | Low (A)                       | Very high (A)              | Low (A)                                    | High (A)                                 |
| <i>Shigella</i> species                   | High (A)                            | Low (A)                               | Low (A)                                         | High (A)                              | Medium (A)                    | High (B)                   | High (B)                                   | High (A)                                 |
| <i>Staphylococcus aureus</i>              | High (A)                            | Very high (A)                         | Very low (A)                                    | High (B)                              | Low (B)                       | Medium (B)                 | Very high (A)                              | High (A)                                 |

**sTable 5 Pathogen scores, Region of the Americas**

A, B, and C codes refer to the level of data available for scoring, as shown in sTable 3.

|                                           | 1 Annual deaths in children under 5 | 2 Annual deaths in people 5 and older | 3 Annual years lived with disability (all ages) | 4 Social and economic burden per case | 5 Disruption due to outbreaks | 6 Contribution to inequity | 7 Contribution to antimicrobial resistance | 8 Unmet needs for prevention & treatment |
|-------------------------------------------|-------------------------------------|---------------------------------------|-------------------------------------------------|---------------------------------------|-------------------------------|----------------------------|--------------------------------------------|------------------------------------------|
| Chikungunya virus                         | Very low (B)                        | Very low (B)                          | Low (B)                                         | Medium (A)                            | High (A)                      | Medium (A)                 | Very low (B)                               | Very high (A)                            |
| <i>Chlamydia trachomatis</i>              | Very low (A)                        | Very low (A)                          | Very low (A)                                    | Very high (A)                         | Very low (A)                  | High (A)                   | Low (A)                                    | High (A)                                 |
| Cytomegalovirus                           | Low (C)                             | Low (C)                               | Medium (C)                                      | High (A)                              | Very low (B)                  | Medium (A)                 | Very low (B)                               | Very high (B)                            |
| Dengue virus                              | Very low (A)                        | Very low (A)                          | Very low (A)                                    | Medium (A)                            | Very high (A)                 | Medium (A)                 | Medium (B)                                 | High (A)                                 |
| Extra-intestinal pathogenic <i>E coli</i> | High (A)                            | High (A)                              | Very low (A)                                    | Medium (A)                            | Low (A)                       | Medium (A)                 | Very high (A)                              | Medium (A)                               |
| Group A streptococcus                     | Low (A)                             | Low (A)                               | Very high (A)                                   | Medium (A)                            | Very low (A)                  | Medium (A)                 | High (B)                                   | Medium (A)                               |
| Group B streptococcus                     | Medium (A)                          | Very low (A)                          | Very low (A)                                    | High (A)                              | Low (A)                       | Medium (A)                 | Low (A)                                    | High (A)                                 |
| Hepatitis C virus                         | Very low (A)                        | Medium (A)                            | Very low (A)                                    | Very high (A)                         | Low (A)                       | Very high (A)              | Low (A)                                    | High (A)                                 |
| Herpes simplex types 1 and 2              | Low (C)                             | Very low (C)                          | Very low (A)                                    | High (A)                              | Very low (B)                  | High (A)                   | Low (A)                                    | High (A)                                 |
| Hookworm                                  | Very low (C)                        | Very low (C)                          | Very low (A)                                    | Low (A)                               | Very low (B)                  | Very high (A)              | Low (B)                                    | Low (A)                                  |
| HIV-1                                     | Low (A)                             | Low (A)                               | Very high (A)                                   | Very high (A)                         | High (A)                      | Very high (A)              | Very high (A)                              | High (A)                                 |
| Influenza                                 | Low (A)                             | Low (A)                               | Very low (A)                                    | Low (A)                               | Very high (A)                 | Medium (A)                 | Medium (A)                                 | High (A)                                 |
| Intestinal pathogenic <i>E coli</i>       | Very low (A)                        | Very low (A)                          | Very low (A)                                    | Medium (A)                            | Medium (B)                    | Medium (B)                 | Very high (A)                              | Medium (A)                               |
| <i>Klebsiella pneumoniae</i>              | Very high (A)                       | Medium (A)                            | Very low (A)                                    | High (A)                              | Low (A)                       | Low (B)                    | Very high (A)                              | High (A)                                 |
| <i>Leishmania</i>                         | Very low (A)                        | Very low (A)                          | Very low (A)                                    | Very high (A)                         | Medium (A)                    | Very high (A)              | Medium (A)                                 | Medium (A)                               |
| <i>Mycobacterium leprae</i> (leprosy)     | Very low (C)                        | Very low (C)                          | Very low (A)                                    | Very high (A)                         | Very low (A)                  | Very high (A)              | Medium (A)                                 | High (A)                                 |
| <i>Mycobacterium tuberculosis</i>         | Very low (B)                        | Very low (B)                          | Low (A)                                         | Very high (A)                         | High (A)                      | Very high (A)              | Very high (A)                              | High (A)                                 |
| <i>Neisseria gonorrhoeae</i>              | Very low (A)                        | Very low (A)                          | Very low (A)                                    | Medium (A)                            | Low (A)                       | High (A)                   | Very high (A)                              | Medium (A)                               |
| Non-typhoidal <i>Salmonella</i>           | Very low (A)                        | Very low (A)                          | Very low (A)                                    | Low (B)                               | Low (A)                       | High (B)                   | High (A)                                   | Medium (A)                               |
| Norovirus                                 | Very low (A)                        | Very low (A)                          | Low (A)                                         | Medium (A)                            | High (A)                      | Medium (A)                 | Low (B)                                    | High (A)                                 |
| <i>Plasmodium falciparum</i> (malaria)    | Very low (C)                        | Very low (C)                          | Very low (C)                                    | High (A)                              | Medium (A)                    | Very high (A)              | High (A)                                   | Medium (A)                               |
| Respiratory syncytial virus               | Medium (A)                          | Low (A)                               | Very low (A)                                    | Medium (A)                            | High (A)                      | Medium (A)                 | Medium (A)                                 | Medium (A)                               |
| <i>Salmonella</i> Paratyphi               | Very low (A)                        | Very low (A)                          | Very low (A)                                    | Low (B)                               | Low (A)                       | High (B)                   | Low (B)                                    | Low (B)                                  |
| Schistosomes                              | Very low (A)                        | Very low (A)                          | Low (A)                                         | Low (A)                               | Low (A)                       | High (A)                   | Low (B)                                    | Medium (A)                               |
| <i>Shigella</i> species                   | Very low (A)                        | Very low (A)                          | Low (A)                                         | High (A)                              | Medium (A)                    | High (A)                   | High (A)                                   | High (A)                                 |
| <i>Staphylococcus aureus</i>              | Very high (A)                       | Very high (A)                         | Very low (A)                                    | High (A)                              | Low (A)                       | Medium (B)                 | Very high (A)                              | High (A)                                 |



**sTable 6 Pathogen scores, Eastern Mediterranean Region**

A, B, and C codes refer to the level of data available for scoring, as shown in sTable 3.

|                                           | 1 Annual deaths in children under 5 | 2 Annual deaths in people 5 and older | 3 Annual years lived with disability (all ages) | 4 Social and economic burden per case | 5 Disruption due to outbreaks | 6 Contribution to inequity | 7 Contribution to antimicrobial resistance | 8 Unmet needs for prevention & treatment |
|-------------------------------------------|-------------------------------------|---------------------------------------|-------------------------------------------------|---------------------------------------|-------------------------------|----------------------------|--------------------------------------------|------------------------------------------|
| Chikungunya virus                         | Very low (B)                        | Very low (B)                          | Very low (B)                                    | Medium (A)                            | Low (A)                       | Medium (A)                 | Very low (B)                               | Very high (A)                            |
| <i>Chlamydia trachomatis</i>              | Very low (A)                        | Very low (A)                          | Very low (A)                                    | Very high (A)                         | Very low (B)                  | High (A)                   | Low (A)                                    | High (A)                                 |
| Cytomegalovirus                           | Very low (C)                        | Low (C)                               | Medium (C)                                      | High (B)                              | Very low (B)                  | Medium (A)                 | Very low (B)                               | Very high (B)                            |
| Dengue virus                              | Very low (A)                        | Very low (A)                          | Very low (A)                                    | Medium (A)                            | Medium (A)                    | Medium (A)                 | Medium (B)                                 | High (A)                                 |
| Extra-intestinal pathogenic <i>E coli</i> | High (A)                            | High (A)                              | Very low (A)                                    | Medium (A)                            | Low (B)                       | Medium (A)                 | Very high (A)                              | Medium (A)                               |
| Group A streptococcus                     | Very low (A)                        | Medium (A)                            | Very high (A)                                   | Medium (A)                            | Very low (B)                  | Medium (B)                 | High (B)                                   | Medium (A)                               |
| Group B streptococcus                     | High (A)                            | Very low (A)                          | Very low (A)                                    | High (B)                              | Low (B)                       | Medium (B)                 | Very low (B)                               | High (A)                                 |
| Hepatitis C virus                         | Very low (A)                        | Very high (A)                         | Very low (A)                                    | Very high (A)                         | Low (B)                       | Very high (A)              | Low (B)                                    | High (A)                                 |
| Herpes simplex types 1 and 2              | Very low (C)                        | Very low (C)                          | Very low (A)                                    | Medium (B)                            | Very low (B)                  | Medium (A)                 | Low (A)                                    | High (A)                                 |
| Hookworm                                  | Very low (C)                        | Very low (C)                          | Low (A)                                         | Low (B)                               | Very low (B)                  | Very high (A)              | Low (B)                                    | Low (A)                                  |
| HIV-1                                     | Very low (A)                        | Low (A)                               | Very low (A)                                    | Very high (A)                         | High (A)                      | Very high (A)              | Very high (A)                              | High (A)                                 |
| Influenza                                 | Very low (A)                        | Very low (A)                          | Very low (A)                                    | Low (B)                               | Very high (A)                 | Medium (B)                 | Medium (B)                                 | High (A)                                 |
| Intestinal pathogenic <i>E coli</i>       | Very low (A)                        | Very low (A)                          | Very low (A)                                    | Medium (A)                            | Medium (B)                    | Medium (B)                 | Very high (A)                              | Medium (A)                               |
| <i>Klebsiella pneumoniae</i>              | Very high (A)                       | Medium (A)                            | Very low (A)                                    | High (B)                              | Low (A)                       | Low (B)                    | Very high (A)                              | High (A)                                 |
| <i>Leishmania</i>                         | Very low (A)                        | Very low (A)                          | Very high (A)                                   | Very high (A)                         | High (A)                      | Very high (A)              | Medium (A)                                 | Medium (A)                               |
| <i>Mycobacterium leprae</i> (leprosy)     | Very low (C)                        | Very low (C)                          | Very low (A)                                    | Very high (B)                         | Very low (A)                  | Very high (B)              | Low (A)                                    | High (A)                                 |
| <i>Mycobacterium tuberculosis</i>         | Low (B)                             | Very high (B)                         | Very high (A)                                   | Very high (A)                         | High (A)                      | Very high (A)              | Very high (A)                              | High (A)                                 |
| <i>Neisseria gonorrhoeae</i>              | Very low (A)                        | Very low (A)                          | Very low (A)                                    | Medium (B)                            | Low (B)                       | High (B)                   | Very high (A)                              | Medium (A)                               |
| Non-typhoidal <i>Salmonella</i>           | Very low (A)                        | Very low (A)                          | Very low (A)                                    | Low (B)                               | Low (B)                       | High (B)                   | High (B)                                   | Medium (A)                               |
| Norovirus                                 | Low (A)                             | Very low (A)                          | Low (A)                                         | Medium (A)                            | High (A)                      | Medium (A)                 | Low (B)                                    | High (A)                                 |
| <i>Plasmodium falciparum</i> (malaria)    | Very low (C)                        | Very low (C)                          | Low (C)                                         | High (A)                              | Low (A)                       | High (B)                   | Medium (A)                                 | Medium (A)                               |
| Respiratory syncytial virus               | Low (A)                             | Very low (A)                          | Very low (A)                                    | Medium (A)                            | High (A)                      | Medium (B)                 | Low (B)                                    | Medium (A)                               |
| <i>Salmonella</i> Paratyphi               | Very low (A)                        | Very low (A)                          | Very low (A)                                    | Low (A)                               | Low (A)                       | High (B)                   | High (A)                                   | Medium (A)                               |
| Schistosomes                              | Very low (A)                        | Very low (A)                          | Low (A)                                         | Low (A)                               | Low (B)                       | High (A)                   | Low (A)                                    | Medium (A)                               |
| <i>Shigella</i> species                   | Low (A)                             | Very low (A)                          | Medium (A)                                      | Medium (A)                            | Medium (B)                    | High (B)                   | High (B)                                   | High (A)                                 |
| <i>Staphylococcus aureus</i>              | High (A)                            | High (A)                              | Very low (A)                                    | High (B)                              | Low (A)                       | Medium (B)                 | Very high (A)                              | High (A)                                 |

**sTable 7 Pathogen scores, European Region**

A, B, and C codes refer to the level of data available for scoring, as shown in sTable 3.

|                                           | 1 Annual deaths in children under 5 | 2 Annual deaths in people 5 and older | 3 Annual years lived with disability (all ages) | 4 Social and economic burden per case | 5 Disruption due to outbreaks | 6 Contribution to inequity | 7 Contribution to antimicrobial resistance | 8 Unmet needs for prevention & treatment |
|-------------------------------------------|-------------------------------------|---------------------------------------|-------------------------------------------------|---------------------------------------|-------------------------------|----------------------------|--------------------------------------------|------------------------------------------|
| Chikungunya virus                         | Very low (B)                        | Very low (B)                          | Very low (B)                                    | Medium (A)                            | Medium (A)                    | Medium (A)                 | Very low (B)                               | Very high (A)                            |
| <i>Chlamydia trachomatis</i>              | Very low (A)                        | Very low (A)                          | Very low (A)                                    | Very high (A)                         | Very low (A)                  | High (A)                   | Low (A)                                    | High (A)                                 |
| Cytomegalovirus                           | Medium (C)                          | Low (C)                               | Medium (C)                                      | High (A)                              | Very low (B)                  | Medium (A)                 | Very low (B)                               | Very high (A)                            |
| Dengue virus                              | Very low (A)                        | Very low (A)                          | Very low (A)                                    | Very low (B)                          | Low (A)                       | Medium (B)                 | Very low (B)                               | Medium (A)                               |
| Extra-intestinal pathogenic <i>E coli</i> | Medium (A)                          | Very high (A)                         | Low (A)                                         | Medium (A)                            | Low (B)                       | Medium (A)                 | Very high (A)                              | Medium (A)                               |
| Group A streptococcus                     | Low (A)                             | Low (A)                               | Very high (A)                                   | Medium (A)                            | Very low (A)                  | Medium (B)                 | High (B)                                   | Medium (A)                               |
| Group B streptococcus                     | Low (A)                             | Very low (A)                          | Very low (A)                                    | High (A)                              | Low (B)                       | Medium (A)                 | Low (A)                                    | High (A)                                 |
| Hepatitis C virus                         | Very low (A)                        | Low (A)                               | Low (A)                                         | Very high (A)                         | Very low (A)                  | Very high (A)              | Low (A)                                    | High (A)                                 |
| Herpes simplex types 1 and 2              | Very low (C)                        | Very low (C)                          | Low (A)                                         | Medium (A)                            | Very low (B)                  | Medium (A)                 | Low (A)                                    | High (A)                                 |
| Hookworm                                  | Very low (C)                        | Very low (C)                          | Very low (A)                                    | Low (B)                               | Very low (B)                  | Very high (A)              | Low (B)                                    | Low (A)                                  |
| HIV-1                                     | Very low (A)                        | Very low (A)                          | Very high (A)                                   | Very high (A)                         | High (A)                      | Very high (A)              | Very high (A)                              | High (A)                                 |
| Influenza                                 | Low (A)                             | Very low (A)                          | Very low (A)                                    | Low (A)                               | Very high (A)                 | Medium (B)                 | Medium (B)                                 | High (A)                                 |
| Intestinal pathogenic <i>E coli</i>       | Very low (A)                        | Very low (A)                          | Very low (A)                                    | Medium (A)                            | Medium (B)                    | Medium (B)                 | Very high (A)                              | Medium (A)                               |
| <i>Klebsiella pneumoniae</i>              | High (A)                            | Medium (A)                            | Very low (A)                                    | High (B)                              | Low (A)                       | Low (B)                    | Very high (A)                              | High (A)                                 |
| <i>Leishmania</i>                         | Very low (A)                        | Very low (A)                          | Very low (A)                                    | Very high (A)                         | Very low (B)                  | High (A)                   | Very low (A)                               | Medium (A)                               |
| <i>Mycobacterium leprae</i> (leprosy)     | Very low (C)                        | Very low (C)                          | Very low (A)                                    | Very high (A)                         | Very low (A)                  | Very high (A)              | Very low (B)                               | High (A)                                 |
| <i>Mycobacterium tuberculosis</i>         | Low (B)                             | Very low (B)                          | Very high (A)                                   | Very high (A)                         | High (A)                      | Very high (A)              | Very high (A)                              | High (A)                                 |
| <i>Neisseria gonorrhoeae</i>              | Very low (A)                        | Very low (A)                          | Very low (A)                                    | Medium (B)                            | Low (B)                       | High (A)                   | Very high (A)                              | Medium (A)                               |
| Non-typhoidal <i>Salmonella</i>           | Very low (A)                        | Very low (A)                          | Very low (A)                                    | Low (B)                               | Low (B)                       | High (B)                   | High (B)                                   | Medium (A)                               |
| Norovirus                                 | Very low (A)                        | Very low (A)                          | High (A)                                        | Low (A)                               | High (A)                      | Medium (A)                 | Low (B)                                    | High (A)                                 |
| <i>Plasmodium falciparum</i> (malaria)    | Very low (C)                        | Very low (C)                          | Very low (C)                                    | Low (B)                               | Very low (A)                  | Very Low (B)               | Very low (A)                               | Very low (B)                             |
| Respiratory syncytial virus               | Very high (A)                       | Very low (A)                          | Very low (A)                                    | Medium (A)                            | High (A)                      | Medium (B)                 | Medium (A)                                 | Medium (A)                               |
| <i>Salmonella</i> Paratyphi               | Very low (A)                        | Very low (A)                          | Very low (A)                                    | Low (B)                               | Low (A)                       | High (B)                   | Low (B)                                    | Low (B)                                  |
| Schistosomes                              | Very low (A)                        | Very low (A)                          | Very low (A)                                    | Very low (B)                          | Low (A)                       | Very low (B)               | Very low (B)                               | Very low (A)                             |
| <i>Shigella</i> species                   | Very low (A)                        | Very low (A)                          | Low (A)                                         | Medium (A)                            | Medium (A)                    | High (B)                   | High (B)                                   | High (A)                                 |
| <i>Staphylococcus aureus</i>              | Very high (A)                       | Very high (A)                         | Very low (A)                                    | High (A)                              | Low (A)                       | Medium (B)                 | Very high (A)                              | High (A)                                 |

**sTable 8 Pathogen scores, South-East Asian Region**

A, B, and C codes refer to the level of data available for scoring, as shown in sTable 3.

|                                           | 1 Annual deaths in children under 5 | 2 Annual deaths in people 5 and older | 3 Annual years lived with disability (all ages) | 4 Social and economic burden per case | 5 Disruption due to outbreaks | 6 Contribution to inequity | 7 Contribution to antimicrobial resistance | 8 Unmet needs for prevention & treatment |
|-------------------------------------------|-------------------------------------|---------------------------------------|-------------------------------------------------|---------------------------------------|-------------------------------|----------------------------|--------------------------------------------|------------------------------------------|
| Chikungunya virus                         | Very low (B)                        | Very low (B)                          | Very low (B)                                    | Medium (A)                            | High (A)                      | Medium (A)                 | Very low (B)                               | Very high (A)                            |
| <i>Chlamydia trachomatis</i>              | Very low (A)                        | Very low (A)                          | Very low (A)                                    | Very high (A)                         | Very low (B)                  | High (A)                   | Low (A)                                    | High (A)                                 |
| Cytomegalovirus                           | Very low (C)                        | Low (C)                               | Medium (C)                                      | High (B)                              | Very low (B)                  | Medium (A)                 | Very low (B)                               | Very high (B)                            |
| Dengue virus                              | Very low (A)                        | Very low (A)                          | Medium (A)                                      | Medium (A)                            | Very high (A)                 | Medium (A)                 | Medium (A)                                 | High (A)                                 |
| Extra-intestinal pathogenic <i>E coli</i> | High (A)                            | Very high (A)                         | Very low (A)                                    | Medium (B)                            | Low (B)                       | Medium (A)                 | Very high (A)                              | Medium (A)                               |
| Group A streptococcus                     | Very low (A)                        | Very high (A)                         | Very high (A)                                   | High (A)                              | Very low (A)                  | High (B)                   | High (B)                                   | High (A)                                 |
| Group B streptococcus                     | High (A)                            | Low (A)                               | Very low (A)                                    | High (B)                              | Low (B)                       | Medium (B)                 | Very low (A)                               | Very high (A)                            |
| Hepatitis C virus                         | Very low (A)                        | High (A)                              | Very low (A)                                    | Very high (A)                         | Low (B)                       | Very high (A)              | Low (A)                                    | High (A)                                 |
| Herpes simplex types 1 and 2              | Very low (C)                        | Very low (C)                          | Very low (A)                                    | High (A)                              | Very low (B)                  | High (A)                   | Low (A)                                    | High (A)                                 |
| Hookworm                                  | Very low (C)                        | Very low (C)                          | Low (A)                                         | Low (A)                               | Very low (B)                  | Very high (A)              | Low (B)                                    | Low (A)                                  |
| HIV-1                                     | Very low (A)                        | Low (A)                               | High (A)                                        | Very high (A)                         | High (A)                      | Very high (A)              | Very high (A)                              | High (A)                                 |
| Influenza                                 | Very low (A)                        | Low (A)                               | Very low (A)                                    | Low (A)                               | Very high (A)                 | Medium (B)                 | High (B)                                   | High (A)                                 |
| Intestinal pathogenic <i>E coli</i>       | Very low (A)                        | Very low (A)                          | Very low (A)                                    | Medium (A)                            | Medium (B)                    | Medium (B)                 | Very high (A)                              | Medium (A)                               |
| <i>Klebsiella pneumoniae</i>              | Very high (A)                       | Very high (A)                         | Very low (A)                                    | High (A)                              | Low (A)                       | Low (B)                    | Very high (A)                              | High (A)                                 |
| <i>Leishmania</i>                         | Very low (A)                        | Very low (A)                          | Very low (A)                                    | Very high (A)                         | High (A)                      | Very high (A)              | Medium (A)                                 | Medium (A)                               |
| <i>Mycobacterium leprae</i> (leprosy)     | Very low (C)                        | Very low (C)                          | Very low (A)                                    | Very high (A)                         | Very low (A)                  | Very high (A)              | Medium (A)                                 | High (A)                                 |
| <i>Mycobacterium tuberculosis</i>         | Very high (B)                       | Very high (B)                         | Very high (A)                                   | Very high (A)                         | Very high (A)                 | Very high (A)              | Very high (A)                              | High (A)                                 |
| <i>Neisseria gonorrhoeae</i>              | Very low (A)                        | Very low (A)                          | Very low (A)                                    | Medium (B)                            | Low (B)                       | High (A)                   | Very high (A)                              | Medium (A)                               |
| Non-typhoidal <i>Salmonella</i>           | Very low (A)                        | Very low (A)                          | Very low (A)                                    | Low (B)                               | Very low (A)                  | High (B)                   | High (B)                                   | Medium (A)                               |
| Norovirus                                 | Very low (A)                        | Low (A)                               | Very low (A)                                    | Medium (A)                            | High (A)                      | Medium (A)                 | Low (B)                                    | High (A)                                 |
| <i>Plasmodium falciparum</i> (malaria)    | Low (C)                             | Very low (C)                          | Low (C)                                         | High (A)                              | Medium (A)                    | High (B)                   | High (A)                                   | Medium (A)                               |
| Respiratory syncytial virus               | High (A)                            | Low (A)                               | Very low (A)                                    | Medium (A)                            | High (A)                      | Medium (B)                 | High (B)                                   | Medium (A)                               |
| <i>Salmonella</i> Paratyphi               | Very low (A)                        | Very low (A)                          | Very low (A)                                    | Low (A)                               | Low (A)                       | High (A)                   | High (A)                                   | Medium (A)                               |
| Schistosomes                              | Very low (A)                        | Very low (A)                          | Very low (A)                                    | Low (B)                               | Low (B)                       | High (A)                   | Low (B)                                    | Medium (A)                               |
| <i>Shigella</i> species                   | Very low (A)                        | Very low (A)                          | Low (A)                                         | High (A)                              | Medium (A)                    | High (B)                   | Very high (A)                              | High (A)                                 |
| <i>Staphylococcus aureus</i>              | High (A)                            | Very high (A)                         | Very low (A)                                    | High (B)                              | Very low (A)                  | Medium (B)                 | Very high (A)                              | High (A)                                 |

**sTable 9 Pathogen scores, Western Pacific Region**

A, B, and C codes refer to the level of data available for scoring, as shown in sTable 3.

|                                           | 1 Annual deaths in children under 5 | 2 Annual deaths in people 5 and older | 3 Annual years lived with disability (all ages) | 4 Social and economic burden per case | 5 Disruption due to outbreaks | 6 Contribution to inequity | 7 Contribution to antimicrobial resistance | 8 Unmet needs for prevention & treatment |
|-------------------------------------------|-------------------------------------|---------------------------------------|-------------------------------------------------|---------------------------------------|-------------------------------|----------------------------|--------------------------------------------|------------------------------------------|
| Chikungunya virus                         | Very low (B)                        | Very low (B)                          | Very low (B)                                    | Medium (A)                            | High (A)                      | Medium (A)                 | Very low (B)                               | High (A)                                 |
| <i>Chlamydia trachomatis</i>              | Very low (A)                        | Very low (A)                          | Very low (A)                                    | Medium (A)                            | Very low (B)                  | Medium (A)                 | Low (A)                                    | High (A)                                 |
| Cytomegalovirus                           | Medium (C)                          | Low (C)                               | Medium (C)                                      | High (A)                              | Very low (B)                  | Medium (A)                 | Very low (B)                               | Very high (B)                            |
| Dengue virus                              | Very low (A)                        | Very low (A)                          | Low (A)                                         | Medium (A)                            | Very high (A)                 | Medium (A)                 | Medium (B)                                 | High (A)                                 |
| Extra-intestinal pathogenic <i>E coli</i> | High (A)                            | Medium (A)                            | Very low (A)                                    | Medium (B)                            | Low (A)                       | Medium (A)                 | Very high (A)                              | Medium (A)                               |
| Group A streptococcus                     | Low (A)                             | Medium (A)                            | Very high (A)                                   | High (A)                              | Very low (A)                  | High (A)                   | High (B)                                   | High (A)                                 |
| Group B streptococcus                     | High (A)                            | Very low (A)                          | Very low (A)                                    | High (B)                              | Low (B)                       | Medium (B)                 | Low (A)                                    | High (A)                                 |
| Hepatitis C virus                         | Very low (A)                        | Medium (A)                            | Very low (A)                                    | Very high (A)                         | Low (A)                       | Very high (A)              | Low (A)                                    | High (A)                                 |
| Herpes simplex types 1 and 2              | Low (C)                             | Very low (C)                          | Very low (A)                                    | High (A)                              | Very low (B)                  | High (A)                   | Low (A)                                    | High (A)                                 |
| Hookworm                                  | Very low (C)                        | Very low (C)                          | Low (A)                                         | Low (A)                               | Very low (B)                  | Very high (A)              | Low (B)                                    | Low (A)                                  |
| HIV-1                                     | Low (A)                             | Very low (A)                          | Medium (A)                                      | Very high (A)                         | High (A)                      | Very high (A)              | Very high (A)                              | High (A)                                 |
| Influenza                                 | Medium (A)                          | Low (A)                               | Very low (A)                                    | Low (A)                               | Very high (A)                 | Medium (B)                 | High (B)                                   | High (A)                                 |
| Intestinal pathogenic <i>E coli</i>       | Very low (A)                        | Very low (A)                          | Very low (A)                                    | Medium (A)                            | Medium (B)                    | Medium (B)                 | Very high (A)                              | Medium (A)                               |
| <i>Klebsiella pneumoniae</i>              | Very high (A)                       | Medium (A)                            | Very low (A)                                    | High (A)                              | Low (A)                       | Low (B)                    | Very high (A)                              | High (A)                                 |
| <i>Leishmania</i>                         | Very low (B)                        | Very low (B)                          | Very low (A)                                    | Very high (A)                         | Very low (B)                  | High (A)                   | Very low (A)                               | Medium (A)                               |
| <i>Mycobacterium leprae</i> (leprosy)     | Very low (C)                        | Very low (C)                          | Very low (A)                                    | Very high (A)                         | Very low (A)                  | Very high (B)              | Medium (A)                                 | High (A)                                 |
| <i>Mycobacterium tuberculosis</i>         | Very high (B)                       | Medium (B)                            | Very high (A)                                   | Very high (A)                         | High (A)                      | Very high (A)              | Very high (A)                              | High (A)                                 |
| <i>Neisseria gonorrhoeae</i>              | Very low (A)                        | Very low (A)                          | Very low (A)                                    | Medium (B)                            | Low (A)                       | High (A)                   | Very high (A)                              | Medium (A)                               |
| Non-typhoidal <i>Salmonella</i>           | Very low (A)                        | Very low (A)                          | Very low (A)                                    | Low (B)                               | Low (B)                       | High (B)                   | High (B)                                   | Medium (A)                               |
| Norovirus                                 | Very low (A)                        | Very low (A)                          | Low (A)                                         | Medium (A)                            | High (A)                      | Medium (A)                 | Low (B)                                    | High (A)                                 |
| <i>Plasmodium falciparum</i> (malaria)    | Very low (C)                        | Very low (C)                          | Very low (C)                                    | High (A)                              | Low (A)                       | High (B)                   | Medium (A)                                 | Medium (A)                               |
| Respiratory syncytial virus               | Very high (A)                       | Very low (A)                          | Very low (A)                                    | Medium (A)                            | High (A)                      | Medium (B)                 | High (A)                                   | Medium (A)                               |
| <i>Salmonella</i> Paratyphi               | Very low (A)                        | Very low (A)                          | Very low (A)                                    | Low (B)                               | Low (A)                       | High (A)                   | Medium (A)                                 | Low (B)                                  |
| Schistosomes                              | Very low (A)                        | Very low (A)                          | Very low (A)                                    | Low (B)                               | Low (B)                       | High (A)                   | Low (A)                                    | Medium (A)                               |
| <i>Shigella</i> species                   | Very low (A)                        | Very low (A)                          | Very low (A)                                    | High (A)                              | Medium (B)                    | High (B)                   | High (B)                                   | High (A)                                 |
| <i>Staphylococcus aureus</i>              | Very high (A)                       | Very high (A)                         | Very low (A)                                    | High (A)                              | Low (A)                       | High (A)                   | Very high (A)                              | High (A)                                 |

## Survey dissemination

### *Dissemination channels*

Surveys were disseminated as described in the Methods section. Dissemination channels are shown in sFigure 2.

**sFigure 2** Survey dissemination

Abbreviations: ADVAC, Advanced Course of Vaccinology; AFRO, WHO African Regional Office; CDC, Center for Disease Control; CHAI, Clinton Health Access Initiative; CSO, Civil Society Organisation; DCVMN, Developing Country Vaccine Manufacturers Network; GVIRF, Global Vaccines and Immunology Research Forum; IFPMA, International Federation of Pharmaceutical Manufacturer’s Associations; MoH, Ministry of Health; NITAG, National Immunisation Technical Advisory Group; NRA, National regulatory authority; PAVM, Partnership for African Vaccine Manufacturing; PDVAC, WHO Product Development for Vaccines Advisory Group; RITAG, Regional Immunisation Technical Advisory Group; SP7 WG, Immunisation Agenda 2030 Strategic Priority 7 Working Group; WHO, World Health Organization; WHO-IVB, WHO Immunization, Vaccines and Biologicals department

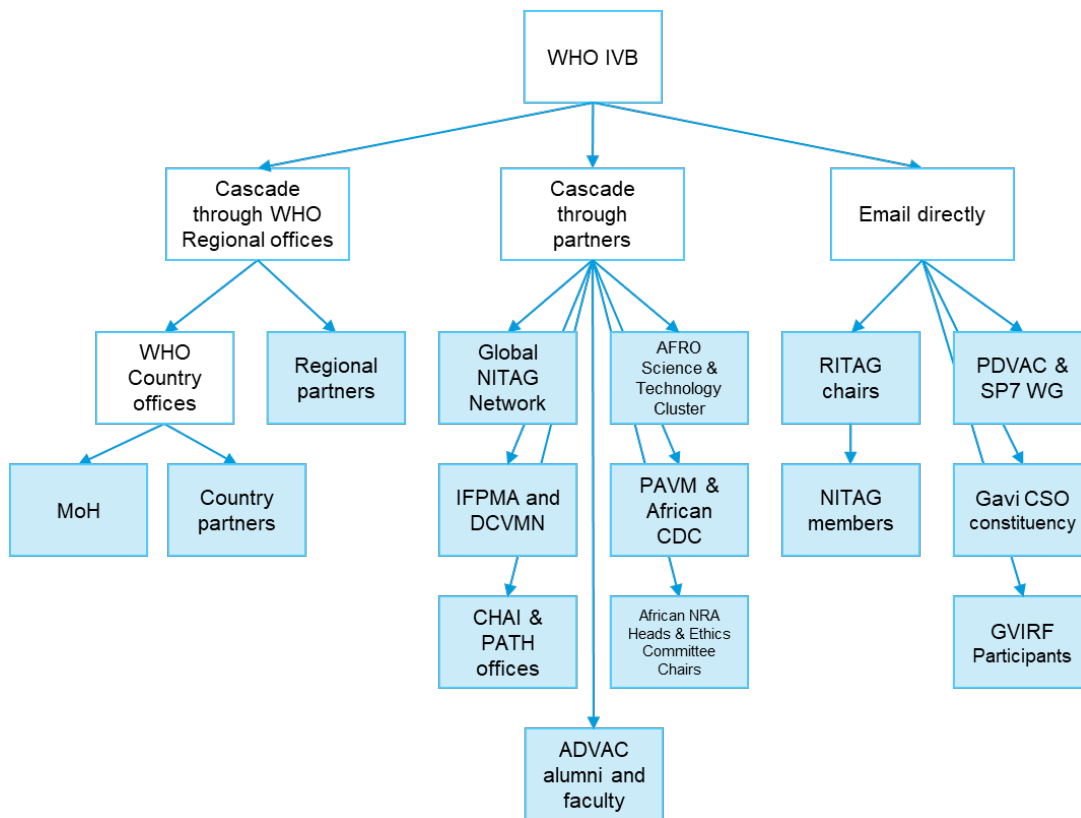

### Survey Invitation

Emails inviting immunization stakeholders to participate in the survey and the attached invitation and survey links shown in sFigure 3 and sFigure 4.

**sFigure 3** Survey invitation: Example email to immunization stakeholders

**From:** IA2030-SP7 <IA2030-SP7@who.int>  
**Sent:** Friday, December 23, 2022 7:26 AM  
**Cc:** SPARROW JONES, Erin Grace <sparrowe@who.int>; GIERSING, Birgitte <giersingb@who.int>; HASSO-AGOPSOWICZ, Mateusz <hassoagopsowiczm@who.int>; Angela Hwang <angela@ahwang.net>  
**Subject:** Please complete and share this survey - Regional and Country Priorities for new vaccine research and development

Dear colleague,

The World Health Organization (WHO) is currently identifying **Regional and Country Priorities for new vaccine research and development**. Unlike global priority-setting projects, this project seeks to understand what is most important to people working at regional and country levels. It seeks to capture diverse perspectives, including from *Ministry of Health officials, policy makers, technical advisory groups, health care professionals, regulators, experts in public health and infectious diseases, pharmaceutical companies, and funders*.

The first step of this process is a “Preferences Survey”, which identifies which criteria for prioritization are most important to each person. **As key stakeholders in immunization, we are kindly requesting you to complete this survey.** The survey is available in versions for each WHO region and in a global version. Please decide whether you would like to respond as a regional stakeholder or as a global stakeholder and choose the appropriate survey from the table below. (If you need to find your WHO region, please see the attached memo.) **The survey will take 30 – 45 minutes to complete.**

In addition to completing the survey, **please share this invitation with other stakeholders** in public health and immunization. Results from this survey will be presented to WHO’s Strategic Advisory Group on Immunization (SAGE) in March 2023, so please complete and forward this survey **as soon as possible**.

| WHO Region            | Language   | Link                                                        |
|-----------------------|------------|-------------------------------------------------------------|
| African               | English    | <a href="https://bit.ly/AFRO_EN">https://bit.ly/AFRO_EN</a> |
|                       | French     | <a href="https://bit.ly/AFRO_FR">https://bit.ly/AFRO_FR</a> |
|                       | Portuguese | <a href="https://bit.ly/AFRO_PT">https://bit.ly/AFRO_PT</a> |
| Americas              | English    | <a href="https://bit.ly/AMRO_EN">https://bit.ly/AMRO_EN</a> |
|                       | Portuguese | <a href="https://bit.ly/AMRO_PT">https://bit.ly/AMRO_PT</a> |
|                       | Spanish    | <a href="https://bit.ly/AMRO_ES">https://bit.ly/AMRO_ES</a> |
| Eastern Mediterranean | Arabic     | <a href="https://bit.ly/EMRO_AR">https://bit.ly/EMRO_AR</a> |
|                       | English    | <a href="https://bit.ly/EMRO_EN">https://bit.ly/EMRO_EN</a> |
|                       | French     | <a href="https://bit.ly/EMRO_FR">https://bit.ly/EMRO_FR</a> |
| Europe                | English    | <a href="https://bit.ly/EURO_EN">https://bit.ly/EURO_EN</a> |
|                       | French     | <a href="https://bit.ly/EURO_FR">https://bit.ly/EURO_FR</a> |
|                       | Portuguese | <a href="https://bit.ly/EURO_PT">https://bit.ly/EURO_PT</a> |

| WHO Region       | Language   | Link                                                          |
|------------------|------------|---------------------------------------------------------------|
|                  | Spanish    | <a href="https://bit.ly/EURO_ES">https://bit.ly/EURO_ES</a>   |
|                  | Russian    | <a href="https://bit.ly/EURO_RU">https://bit.ly/EURO_RU</a>   |
| South-East Asian | English    | <a href="https://bit.ly/SEARO_EN">https://bit.ly/SEARO_EN</a> |
|                  | Portuguese | <a href="https://bit.ly/SEARO_PT">https://bit.ly/SEARO_PT</a> |
| Western Pacific  | Chinese    | <a href="https://bit.ly/WPRO_ZH">https://bit.ly/WPRO_ZH</a>   |
|                  | English    | <a href="https://bit.ly/WPRO_EN">https://bit.ly/WPRO_EN</a>   |
|                  | French     | <a href="https://bit.ly/WPRO_FR">https://bit.ly/WPRO_FR</a>   |

The next step of the prioritization process will be regional consultations in 2023 to deliberate and align on the final priority list. Additional information and emerging results from this project are being posted to [TechNet-21](#).

If you have any questions or suggestions about this project, please email [IA2030-SP7@who.int](mailto:IA2030-SP7@who.int) and Angela Hwang ([angela@ahwang.net](mailto:angela@ahwang.net)).

Thank you and warm regards,

Gitte

**Birgitte Giersing, PhD**

Team Lead Vaccine Platforms & Prioritization  
 Vaccine Product and Delivery Research (PDR) Unit  
 Department of Immunization, Vaccines & Biologicals (IVB)  
 Universal Health Coverage/Lifecourse Division  
 World Health Organization, Geneva, Switzerland  
 Mobile: +41 79 764 1655

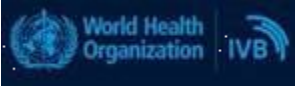

**Websites:** [Immunization, Vaccines and Biologicals](#); [World Health Organization Immunization Agenda 2030](#); [COVAX Country Readiness and Delivery](#)

sFigure 4

Survey invitation: Example email attachment

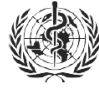

World Health  
Organization

20, AVENUE APPIA – CH-1211 GENEVA 27 – SWITZERLAND – TEL CENTRAL +41 22 791 2111 – FAX CENTRAL +41 22 791 3111 – WWW.WHO.INT

Tel. direct:

Fax direct:

E-mail : IA2030-SP7@who.int

In reply please  
refer to:

Your reference:

22 November 2022

**Regional priorities for vaccine development**

Dear Colleagues,

This letter serves as a request for assistance in defining regional priorities for vaccine research and development. Under Immunization Agenda 2030, the World Health Organization (WHO) is responsible for assembling a “short list” of pathogens that should be prioritized for new vaccine development.

To aid in identifying these priorities, WHO is conducting a survey to understand what is most important from a regional and country perspective. The survey is meant to capture diverse perspectives and will take 30 - 45 minutes to complete.

As an expert in public health, your perspectives are important to this work. **Please see the table on the next page to access the survey for your region.** If you would like to complete the survey from a global perspective, please go to [https://bit.ly/GLOBAL\\_EN](https://bit.ly/GLOBAL_EN) instead.

Additional information about this project may be found at [www.technet-21.org/en/topics/regional-and-country-priorities](http://www.technet-21.org/en/topics/regional-and-country-priorities).

Should you have any questions or suggestions, please contact us by email at [IA2030-SP7@who.int](mailto:IA2030-SP7@who.int).

Yours sincerely,

A handwritten signature in cursive script that reads "Katherine O'Brien".

Dr Kate O'Brien  
Director, Immunization, Vaccines and Biologicals,  
Universal Health Coverage and Life Course



|                                                                |                                                                                                                                                                                                                                                                                                                                                                                        |                                                                                                                                                                                                                            |                                                                                                                                                                                                                          |                                                                                                                                                                                                                                 |
|----------------------------------------------------------------|----------------------------------------------------------------------------------------------------------------------------------------------------------------------------------------------------------------------------------------------------------------------------------------------------------------------------------------------------------------------------------------|----------------------------------------------------------------------------------------------------------------------------------------------------------------------------------------------------------------------------|--------------------------------------------------------------------------------------------------------------------------------------------------------------------------------------------------------------------------|---------------------------------------------------------------------------------------------------------------------------------------------------------------------------------------------------------------------------------|
| Africa<br>Afrigue<br>África                                    | English:<br><a href="https://bit.ly/AFRO_EN">https://bit.ly/AFRO_EN</a><br>Français:<br><a href="https://bit.ly/AFRO_FR">https://bit.ly/AFRO_FR</a><br>Português:<br><a href="https://bit.ly/AFRO_PT">https://bit.ly/AFRO_PT</a>                                                                                                                                                       | Algeria<br>Angola<br>Benin<br>Botswana<br>Burkina Faso<br>Burundi<br>Cabo Verde<br>Cameroon<br>Central African Republic<br>Chad<br>Comoros<br>Congo, Dem. Rep.<br>Congo, Rep.<br>Côte d'Ivoire<br>Equatorial Guinea        | Eritrea<br>Eswatini<br>Ethiopia<br>Gabon<br>Gambia, The<br>Ghana<br>Guinea<br>Guinea-Bissau<br>Kenya<br>Lesotho<br>Liberia<br>Madagascar<br>Malawi<br>Mali<br>Mauritania<br>Mauritius<br>Mozambique                      | Namibia<br>Niger<br>Nigeria<br>Rwanda<br>São Tomé and Príncipe<br>Senegal<br>Seychelles<br>Sierra Leone<br>South Africa<br>South Sudan<br>Tanzania<br>Togo<br>Uganda<br>Zambia<br>Zimbabwe                                      |
| Americas<br>Américas<br>Américas                               | English:<br><a href="https://bit.ly/AMRO_EN">https://bit.ly/AMRO_EN</a><br>Español:<br><a href="https://bit.ly/AMRO_ES">https://bit.ly/AMRO_ES</a><br>Português:<br><a href="https://bit.ly/AMRO_PT">https://bit.ly/AMRO_PT</a>                                                                                                                                                        | Antigua and Barbuda<br>Argentina<br>Bahamas, The<br>Barbados<br>Belize<br>Bolivia<br>Brazil<br>Canada<br>Chile<br>Colombia<br>Costa Rica<br>Cuba                                                                           | Dominica<br>Dominican Republic<br>Ecuador<br>El Salvador<br>Grenada<br>Guatemala<br>Guyana<br>Haiti<br>Honduras<br>Jamaica<br>Mexico<br>Nicaragua                                                                        | Panama<br>Paraguay<br>Peru<br>St. Kitts and Nevis<br>St. Lucia<br>St. Vincent and the Grenadines<br>Suriname<br>Trinidad and Tobago<br>United States<br>Uruguay<br>Venezuela                                                    |
| شرق المتوسط<br>Eastern Mediterranean<br>Méditerranée orientale | العربية<br><a href="https://bit.ly/EMRO_AR">https://bit.ly/EMRO_AR</a><br>English:<br><a href="https://bit.ly/EMRO_EN">https://bit.ly/EMRO_EN</a><br>Français:<br><a href="https://bit.ly/EMRO_FR">https://bit.ly/EMRO_FR</a>                                                                                                                                                          | Afghanistan<br>Bahrain<br>Djibouti<br>Egypt, Arab Rep.<br>Iran, Islamic Rep.<br>Iraq<br>Jordan                                                                                                                             | Kuwait<br>Lebanon<br>Libya<br>Morocco<br>Oman<br>Pakistan<br>Qatar<br>Saudi Arabia<br>Somalia                                                                                                                            | Sudan<br>Syrian Arab Republic<br>Tunisia<br>United Arab Emirates<br>Yemen, Rep.                                                                                                                                                 |
| Europe<br>L'Europe<br>Europa<br>Europa<br>Европа               | English:<br><a href="https://bit.ly/EURO_EN">https://bit.ly/EURO_EN</a><br>Français:<br><a href="https://bit.ly/EURO_FR">https://bit.ly/EURO_FR</a><br>Español:<br><a href="https://bit.ly/EURO_ES">https://bit.ly/EURO_ES</a><br>Português:<br><a href="https://bit.ly/EURO_PT">https://bit.ly/EURO_PT</a><br>Русский:<br><a href="https://bit.ly/EURO_RU">https://bit.ly/EURO_RU</a> | Albania<br>Andorra<br>Armenia<br>Austria<br>Azerbaijan<br>Belarus<br>Belgium<br>Bosnia and Herzegovina<br>Bulgaria<br>Croatia<br>Cyprus<br>Czech Republic<br>Denmark<br>Estonia<br>Finland<br>France<br>Georgia<br>Germany | Hungary<br>Iceland<br>Ireland<br>Greece<br>Israel<br>Italy<br>Kazakhstan<br>Kyrgyz Republic<br>Latvia<br>Lithuania<br>Luxembourg<br>Malta<br>Moldova<br>Monaco<br>Montenegro<br>Netherlands<br>North Macedonia<br>Norway | Poland<br>Portugal<br>Romania<br>Russian Federation<br>San Marino<br>Serbia<br>Slovak Republic<br>Slovenia<br>Spain<br>Sweden<br>Switzerland<br>Tajikistan<br>Turkey<br>Turkmenistan<br>Ukraine<br>United Kingdom<br>Uzbekistan |

منظمة الصحة العالمية • 世界卫生组织

Organisation mondiale de la Santé • Всемирная организация здравоохранения • Organización Mundial de la Salud

|                                                           |                                                                                                                                                                                                                                                                                           |                                                                                                                    |                                                                                                                       |                                                                                                                   |
|-----------------------------------------------------------|-------------------------------------------------------------------------------------------------------------------------------------------------------------------------------------------------------------------------------------------------------------------------------------------|--------------------------------------------------------------------------------------------------------------------|-----------------------------------------------------------------------------------------------------------------------|-------------------------------------------------------------------------------------------------------------------|
| South-East Asia<br><br>Sudeste Asiático                   | English:<br><a href="https://bit.ly/SEARO_EN">https://bit.ly/SEARO_EN</a><br><br>Português:<br><a href="https://bit.ly/SEARO_PT">https://bit.ly/SEARO_PT</a>                                                                                                                              | Bangladesh<br>Bhutan<br>India<br>Indonesia                                                                         | Korea, Dem. People's Rep.<br>Maldives<br>Myanmar                                                                      | Nepal<br>Sri Lanka<br>Thailand<br>Timor-Leste                                                                     |
| Western Pacific<br><br>Pacifique occidental<br><br>西太平洋地区 | English:<br><a href="https://bit.ly/WPRO_EN">https://bit.ly/WPRO_EN</a><br><br>Français:<br><a href="https://bit.ly/WPRO_FR">https://bit.ly/WPRO_FR</a><br><br>中文:<br><a href="https://survey.1000minds.com/16166/WHO_VAC_WPRO_ZH">https://survey.1000minds.com/16166/WHO_VAC_WPRO_ZH</a> | Australia<br>Brunei<br>Darussalam<br>Cambodia<br>China<br>Cook Islands<br>Fiji<br>Japan<br>Kiribati<br>Korea, Rep. | Lao PDR<br>Malaysia<br>Marshall Islands<br>Micronesia, Fed. Sts.<br>Mongolia<br>Nauru<br>New Zealand<br>Niue<br>Palau | Papua New Guinea<br>Philippines<br>Samoa<br>Singapore<br>Solomon Islands<br>Tonga<br>Tuvalu<br>Vanuatu<br>Vietnam |

## Survey components

### *Survey introduction*

Each survey started with the introductory text and biographical questions shown in sFigure 5.

sFigure 5 Survey introduction

1000minds

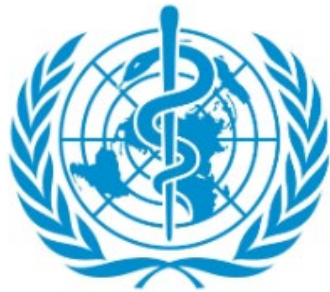

# World Health Organization

## Regional priorities for vaccine development

In this survey, you will help to define priorities for vaccine development in the WHO European region. These priorities will inform vaccine research and development, and be used to monitor progress in the [Immunization Agenda 2030 Research & Innovation strategy](#).

In this survey, you will be presented with pairs of imaginary pathogens, and asked which one you would prioritise for vaccine development. Each question will involve tradeoffs between two criteria that are commonly used to set priorities.

Here's an example question:

Which pathogen would you prioritise for vaccine development?

|                                                                                                                                                                                                                |                                                                                                                                                                                                                       |
|----------------------------------------------------------------------------------------------------------------------------------------------------------------------------------------------------------------|-----------------------------------------------------------------------------------------------------------------------------------------------------------------------------------------------------------------------|
| <p>Annual deaths in children under 5<br/>Medium (3,000-4,500 deaths per year).</p> <p>Disruption due to outbreaks<br/>Medium social disruption or impact on healthcare, trade or tourism</p> <p>Prioritise</p> | <p>Annual deaths in children under 5<br/>Very high (more than 6,100 per year)</p> <p>Disruption due to outbreaks<br/>Very low or no social disruption or impact on healthcare, trade or tourism</p> <p>Prioritise</p> |
| <p>They are equal</p>                                                                                                                                                                                          |                                                                                                                                                                                                                       |

When thinking about your answer, please consider just what is important for the European region. Assume that the pathogens are the same in every way except for the information given. If you need more information about the criteria, click the "Info" button at the bottom of the page.

Click on the pathogen you think is more important. If both are equally important, click, "They are equal". The survey should take around 30 minutes to complete, and your individual results will be shown after you are done.

If you have comments about the survey, enter them using the "Comment" button at the bottom of each page, or at the end of the survey. For more information on the survey, please see [link](#).

Your participation is voluntary. By clicking on "start survey", you are showing you consent to taking part in the survey. Your responses will be taken as your personal views, and not reflecting the position of any organisations with which you are employed or affiliated. Reports of survey results will not include any personal identifiers such as names or email addresses.

Thank you very much.

Your name \*

Your email address \*

What country do you work in? \*

What kind of organisation do you work for? (select all that apply) \*

- Academic institution
- Funding agency
- Government
- Healthcare provider
- Non-governmental organisation
- Pharmaceutical industry
- Regulatory agency
- United Nations agency
- Other

What are your main areas of expertise? (select all that apply) \*

- Disease epidemiology
- Economics and health financing
- Healthcare
- Health policy
- Regulatory affairs
- Vaccine research and development
- Other

How long have you been working in a health-related area? \*

- Up to 10 years
- 11 - 20 years
- 21 - 30 years
- More than 30 years

Next

**PAPRIKA survey questions**

In the PAPRIKA method, the survey participant chooses between hypothetical alternatives described in terms of two criteria at a time. (sFigure 6) Additional questions are posed until the participants preferences are fully captured. PAPRIKA minimises the number of questions using adaptive choice-based conjoint analysis, so each participant responds to a personalized sequence of questions.

**sFigure 6 Example Survey Question**

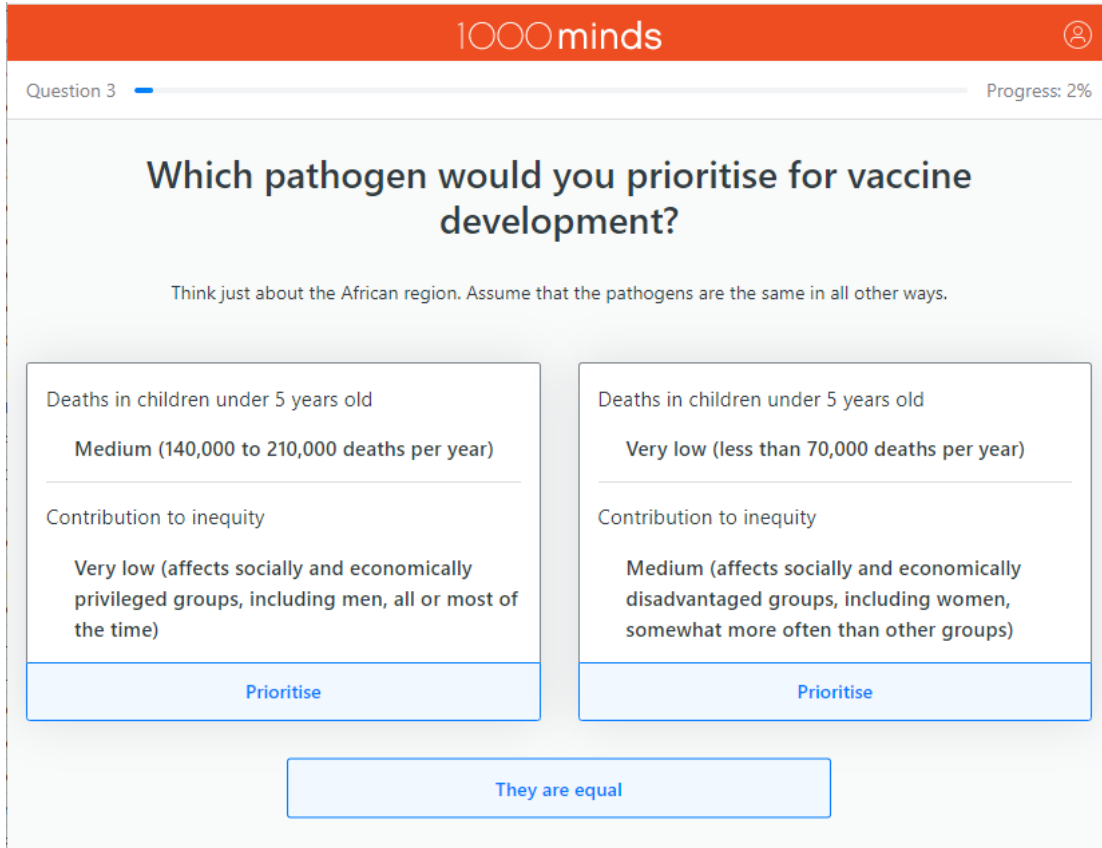

The software then applies mathematical techniques based on linear programming to the participant’s choices to calculate the relative importance, or weight, of each level of each criterion. In reporting weights, the total weight of Very high scores is set to 100%, and the weight of all Very low scores is set to 0%. To streamline surveys, weights for Low and High scores are interpolated from weights for Very high, Medium, and Very low scores.

sFigure 7 illustrates how total weight is calculated for each pathogen in each region. A participant’s total weight for a pathogen is calculated by summing the weights that correspond to the pathogen’s scores in their region. Within each region, individual total weights for each pathogen are averaged to give a regional total weight for the pathogen. This regional total weight is then used to rank the pathogens within the region.

**Figure 7 Calculating total weight for a pathogen**

**Step 1. Score pathogens**

| Pathogens                              | Criteria                            |                                       |                                                 |                                       |                               |                            |                                            |                                          |
|----------------------------------------|-------------------------------------|---------------------------------------|-------------------------------------------------|---------------------------------------|-------------------------------|----------------------------|--------------------------------------------|------------------------------------------|
|                                        | 1 Annual deaths in children under 5 | 2 Annual deaths in people 5 and older | 3 Annual years lived with disability (all ages) | 4 Social and economic burden per case | 5 Disruption due to outbreaks | 6 Contribution to inequity | 7 Contribution to antimicrobial resistance | 8 Unmet needs for prevention & treatment |
| Mycobacterium tuberculosis (TB)*       | Low                                 | Very high                             | Very high                                       | Very high                             | High                          | Very high                  | Very high                                  | High                                     |
| Staphylococcus aureus                  | High                                | High                                  | Very low                                        | High                                  | Low                           | Medium                     | Very high                                  | High                                     |
| Klebsiella pneumoniae                  | Very high                           | Medium                                | Very low                                        | High                                  | Low                           | Low                        | Very high                                  | High                                     |
| Human immunodeficiency virus 1 (HIV-1) | Very low                            | Low                                   | Very low                                        | Very high                             | High                          | Very high                  | Very high                                  | High                                     |

**Step 2. Surveys give weight of each criteria/score combination**

| Score     | Criteria                            |                                       |                                                 |                                       |                               |                            |                                            |                                          |
|-----------|-------------------------------------|---------------------------------------|-------------------------------------------------|---------------------------------------|-------------------------------|----------------------------|--------------------------------------------|------------------------------------------|
|           | 1 Annual deaths in children under 5 | 2 Annual deaths in people 5 and older | 3 Annual years lived with disability (all ages) | 4 Social and economic burden per case | 5 Disruption due to outbreaks | 6 Contribution to inequity | 7 Contribution to antimicrobial resistance | 8 Unmet needs for prevention & treatment |
| Very high | 0.150                               | 0.119                                 | 0.128                                           | 0.106                                 | 0.132                         | 0.117                      | 0.144                                      | 0.105                                    |
| High      | 0.113                               | 0.092                                 | 0.098                                           | 0.077                                 | 0.094                         | 0.089                      | 0.103                                      | 0.078                                    |
| Medium    | 0.076                               | 0.064                                 | 0.069                                           | 0.051                                 | 0.060                         | 0.061                      | 0.065                                      | 0.052                                    |
| Low       | 0.039                               | 0.034                                 | 0.037                                           | 0.026                                 | 0.029                         | 0.031                      | 0.032                                      | 0.027                                    |
| Very low  | 0.000                               | 0.000                                 | 0.000                                           | 0.000                                 | 0.000                         | 0.000                      | 0.000                                      | 0.000                                    |

**Step 3. Sum weights corresponding to pathogen scores**

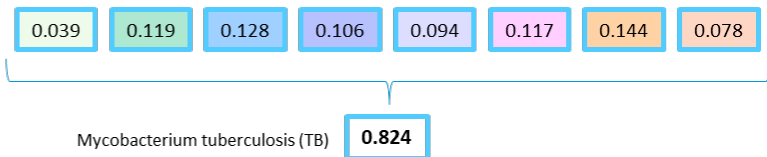

**Post-survey information**

Each survey concluded by presenting the participant’s results and asking face validity questions shown in sFigure 8.

**sFigure 8 Post-survey information (demo survey)**

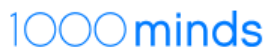

# Almost done!

Based on your choices, these are your personal priorities for vaccine development in this region. For more information on how these results are calculated, please see [link](#).

As part of [Immunization Agenda 2030 Research & Innovation strategy](#), your results will be combined with data from other stakeholders to identify regional and global priorities for vaccine development.

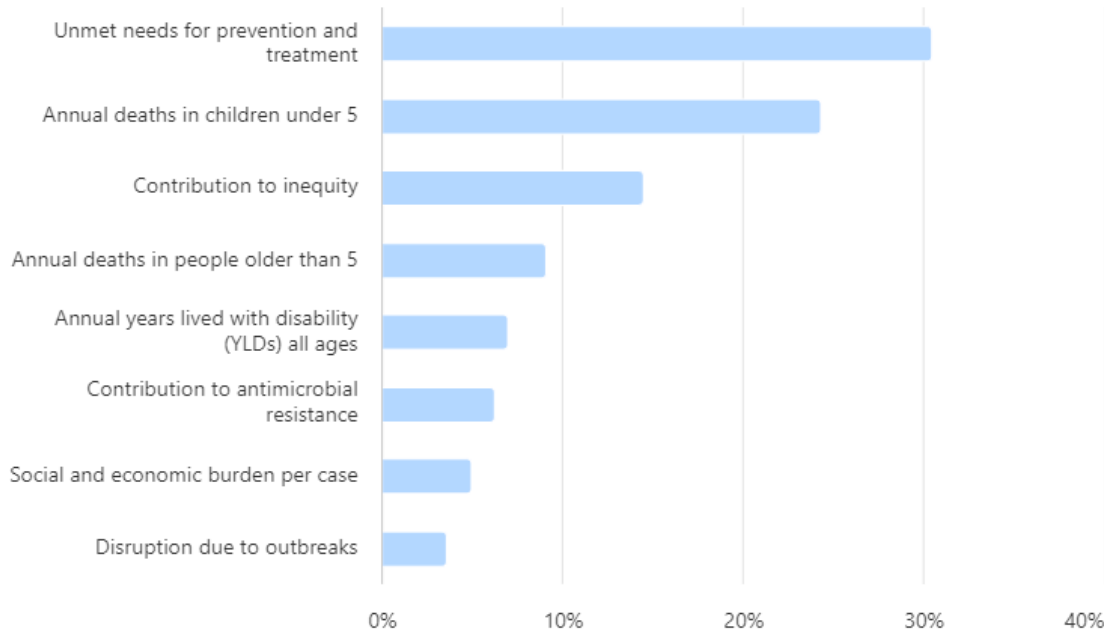



|    |                                             |   |
|----|---------------------------------------------|---|
| 1  | Mycobacterium tuberculosis (TB)             | ▼ |
| 2  | Klebsiella pneumoniae                       | ▼ |
| 3  | Staphylococcus aureus                       | ▼ |
| 4  | Human immunodeficiency virus 1 (HIV-1)      |   |
| 5  | Extra-intestinal pathogenic E. coli (ExPEC) |   |
| 6  | Respiratory syncytial virus                 | ▼ |
| 7  | Group A streptococcus (Streptococcus pyo)   |   |
| 8  | Group B streptococcus (Streptococcus aga)   |   |
| 9  | Pseudomonas aeruginosa                      | ▼ |
| 10 | Mycobacterium leprae (leprosy)              | ▼ |
| 11 | Shigella                                    | ▼ |
| 12 | Leishmania                                  | ▼ |
| 13 | Plasmodium falciparum (malaria)             | ▼ |
| 14 | Influenza                                   | ▼ |
| 15 | Cytomegalovirus                             | ▼ |
| 16 | Norovirus                                   | ▼ |
| 17 | Neisseria gonorrhoeae                       | ▼ |
| 18 | Herpes simplex types 1 and 2                | ▼ |
| 19 | Chikungunya virus                           | ▼ |
| 20 | Intestinal pathogenic E. coli (InPEC)       | ▼ |
| 21 | Salmonella Paratyphi                        | ▼ |
| 22 | Non-typhoidal Salmonella                    | ▼ |
| 23 | Schistosomes                                | ▼ |

Does the order of criteria in the bar chart seem correct to you? \*

- Yes
- No
- Not sure

Does the order of pathogens listed seem reasonable to you? \*

- Yes
- No
- Not sure

In your results, what was surprising? What was as expected?

Was the survey easy or difficult to understand? \*

- Very difficult
- Difficult
- Neutral
- Easy
- Very easy

Do you have any comments you would like to share?

Thank you for taking part in our survey. To learn more about this project, go to [link](#).

Auto-fill

Continue

## Survey participants

Participants could start the survey multiple times. In total 577 responses were received from 533 survey participants.

sFigure 9

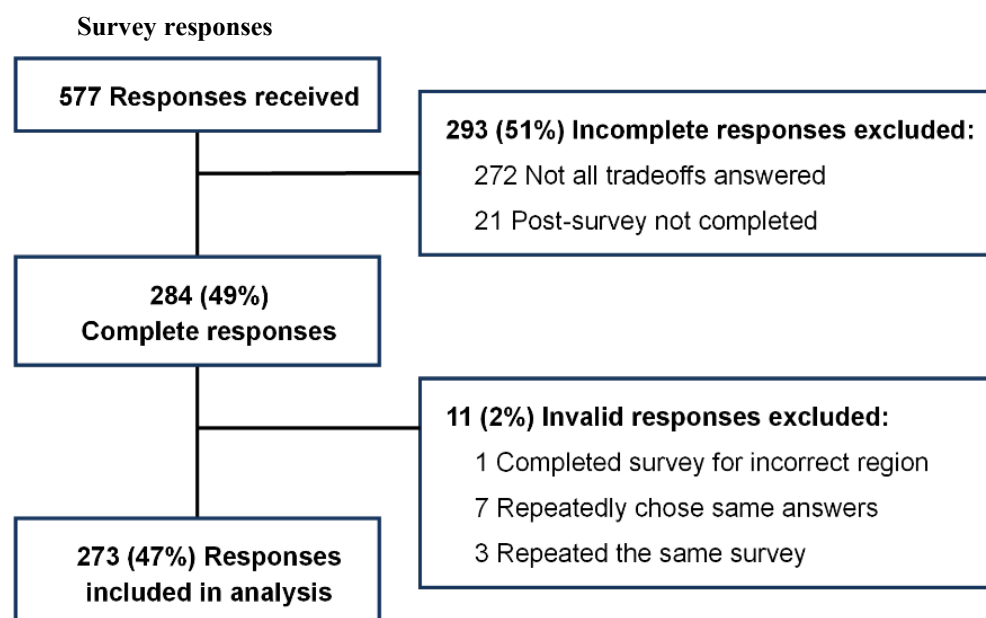

sTable 10 Regional and country representation in included survey responses

| WHO Region   | Responses included | Countries represented / Countries in region | % of countries | Countries with responses                                                                                                                                                                                                                                                         |
|--------------|--------------------|---------------------------------------------|----------------|----------------------------------------------------------------------------------------------------------------------------------------------------------------------------------------------------------------------------------------------------------------------------------|
| African      | 55                 | 27 / 47                                     | 57%            | Benin, Burkina Faso, Burundi, Cameroon, Chad, Comoros, Congo, Democratic Republic, Congo, Rep., Eritrea, Eswatini, Ethiopia, Gabon, Ghana, Kenya, Madagascar, Malawi, Mali, Nigeria, Rwanda, Senegal, Seychelles, Sierra Leone, South Africa, Tanzania, Uganda, Zambia, Zimbabwe |
| Americas     | 45                 | 18 / 35                                     | 51%            | Argentina, Bahamas, Barbados, Bolivia, Brazil, Canada, Chile, Colombia, Cuba, Ecuador, El Salvador, Guatemala, Guyana, Jamaica, Mexico, Peru, Suriname, United States                                                                                                            |
| E. Med.      | 38                 | 15 / 21                                     | 71%            | Afghanistan, Bahrain, Djibouti, Egypt, Arab Rep., Iran, Islamic Rep., Jordan, Kuwait, Lebanon, Oman, Pakistan, Saudi Arabia, Sudan, Syrian Arab Republic, Tunisia, United Arab Emirates                                                                                          |
| European     | 26                 | 10 / 53                                     | 19%            | France, Germany, Israel, Netherlands, Norway, Russian Federation, Sweden, Switzerland, Tajikistan, United Kingdom                                                                                                                                                                |
| SE Asian     | 44                 | 9 / 11                                      | 82%            | Bangladesh, Bhutan, India, Indonesia, Maldives, Myanmar, Nepal, Thailand, Timor-Leste                                                                                                                                                                                            |
| W. Pacific   | 65                 | 10 / 27                                     | 37%            | Australia, Cambodia, China, Fiji, Korea, Rep., Lao PDR, New Zealand, Papua New Guinea, Philippines, Vietnam                                                                                                                                                                      |
| <i>Total</i> | 273                | 89 / 194                                    | 46%            |                                                                                                                                                                                                                                                                                  |

**sTable 11 Characteristics of survey participants**

P-values were obtained using Chi-square or Fisher’s Exact Test (when cell counts were less than 5) when assessing differences in proportions between “Africa” compared to other WHO regions.

Abbreviations: R&D, Research & Development

| Characteristic               | Option             | Africa<br>(n=55) | Americas<br>(n=45) | P-value | Eastern<br>Mediterranean<br>(n=38) | P-value | Europe<br>(n=26) | P-value | Southeast Asia<br>(n=44) | P-value | Western Pacific<br>(n=65) | P-value | Total<br>(n=273) |
|------------------------------|--------------------|------------------|--------------------|---------|------------------------------------|---------|------------------|---------|--------------------------|---------|---------------------------|---------|------------------|
|                              |                    | n (%)            | n (%)              |         | n (%)                              |         | n (%)            |         | n (%)                    |         | n (%)                     |         | n (%)            |
| <b>Years of Experience</b>   |                    |                  |                    |         |                                    |         |                  |         |                          |         |                           |         |                  |
|                              | Up to 10 years     | 8 (15)           | 5 (11)             | 0.03    | 3 (8)                              | 0.31    | 3 (12)           | 0.04    | 6 (14)                   | 0.20    | 7 (11)                    | 0.08    | 32(12)           |
|                              | 11-20 years        | 27 (49)          | 11 (24)            |         | 14 (37)                            |         | 5 (19)           |         | 13 (30)                  |         | 19 (29)                   |         | 89 (33)          |
|                              | 21-30 years        | 10 (18)          | 11 (24)            |         | 12 (32)                            |         | 9 (35)           |         | 12 (27)                  |         | 19 (29)                   |         | 73 (27)          |
|                              | More than 30 years | 10 (18)          | 18 (40)            |         | 9 (24)                             |         | 9 (35)           |         | 13 (30)                  |         | 20 (31)                   |         | 79 (29)          |
| <b>Expertise</b>             |                    |                  |                    |         |                                    |         |                  |         |                          |         |                           |         |                  |
| Disease Epidemiology         | No                 | 24 (44)          | 18 (40)            | 0.84    | 15 (40)                            | 0.83    | 14 (54)          | 0.48    | 23 (52)                  | 0.42    | 36 (55)                   | 0.27    | 130 (48)         |
|                              | Yes                | 31(56)           | 27 (60)            |         | 23 (60)                            |         | 12 (46)          |         | 21(48)                   |         | 29 (45)                   |         | 143 (52)         |
| Economics & Health Financing | No                 | 51 (93)          | 42 (93)            | 1.00    | 34 (90)                            | 0.71    | 25 (96)          | 1.00    | 39 (89)                  | 0.50    | 63 (97)                   | 0.41    | 254 (93)         |
|                              | Yes                | 4 (7)            | 3 (7)              |         | 4 (10)                             |         | 1 (4)            |         | 5 (11)                   |         | 2 (3)                     |         | 19 (7)           |
| Healthcare                   | No                 | 35 (64)          | 17 (38)            | 0.02    | 18 (47)                            | 0.14    | 17 (65)          | 1.00    | 26 (59)                  | 0.68    | 50 (77)                   | 0.16    | 163 (60)         |
|                              | Yes                | 20 (36)          | 28 (62)            |         | 20 (53)                            |         | 9 (35)           |         | 18 (41)                  |         | 15 (23)                   |         | 110 (40)         |
| Health policy                | No                 | 38 (69)          | 34 (76)            | 0.51    | 24 (63)                            | 0.66    | 15 (58)          | 0.33    | 30 (68)                  | 1.00    | 52 (80)                   | 0.21    | 193 (71)         |
|                              | Yes                | 17 (31)          | 11 (24)            |         | 14 (37)                            |         | 11 (42)          |         | 14 (32)                  |         | 13 (20)                   |         | 80 (29)          |
| Regulatory affairs           | No                 | 50 (91)          | 44 (98)            | 0.22    | 36 (95)                            | 0.70    | 25 (96)          | 0.66    | 39 (89)                  | 0.75    | 59 (91)                   | 1.00    | 253 (93)         |
|                              | Yes                | 5 (9)            | 1 (2)              |         | 2 (5)                              |         | 1 (4)            |         | 5 (11)                   |         | 6 (9)                     |         | 20 (7)           |
| Vaccine R&D                  | No                 | 34 (62)          | 26 (58)            | 0.22    | 27 (71)                            | 0.38    | 7 (27)           | 0.004   | 27 (61)                  | 1.00    | 29 (45)                   | 0.07    | 150 (55)         |
|                              | Yes                | 21 (38)          | 19 (42)            |         | 11 (29)                            |         | 19 (73)          |         | 17 (39)                  |         | 36 (55)                   |         | 123 (45)         |
| Other Expertise              | No                 | 45 (82)          | 42 (93)            | 0.14    | 34 (90)                            | 0.38    | 22 (85)          | 1.00    | 41 (93)                  | 0.14    | 58 (89)                   | 0.30    | 242 (89)         |
|                              | Yes                | 10 (18)          | 3 (7)              |         | 4 (10)                             |         | 4 (15)           |         | 3 (7)                    |         | 7 (11)                    |         | 31 (11)          |

| Characteristic                | Option | Africa<br>(n=55) | Americas<br>(n=45) | P-value | Eastern<br>Mediterranean<br>(n=38) | P-value | Europe<br>(n=26) | P-value | Southeast Asia<br>(n=44) | P-value | Western Pacific<br>(n=65) | P-value | Total<br>(n=273) |
|-------------------------------|--------|------------------|--------------------|---------|------------------------------------|---------|------------------|---------|--------------------------|---------|---------------------------|---------|------------------|
|                               |        | n (%)            | n (%)              |         | n (%)                              |         | n (%)            |         | n (%)                    |         | n (%)                     |         | n (%)            |
| <b>Organisation Type</b>      |        |                  |                    |         |                                    |         |                  |         |                          |         |                           |         |                  |
| Academic Institution          | No     | 38 (69)          | 18 (40)            | 0.01    | 29 (76)                            | 0.49    | 16 (62)          | 0.62    | 29 (66)                  | 0.83    | 36 (55)                   | 0.14    | 166 (61)         |
|                               | Yes    | 17 (31)          | 27 (60)            |         | 9 (24)                             |         | 10 (38)          |         | 15 (34)                  |         | 29 (45)                   |         | 107 (39)         |
| Funding Agency                | No     | 54 (98)          | 45 (100)           | 1.00    | 37 (97)                            | 1.00    | 24 (92)          | 0.24    | 44 (100)                 | 1.00    | 60 (92)                   | 0.22    | 264 (97)         |
|                               | Yes    | 1 (2)            | 0 (0)              |         | 1 (3)                              |         | 2 (8)            |         | 0 (0)                    |         | 5 (8)                     |         | 9 (3)            |
| Government                    | No     | 36 (66)          | 34 (76)            | 0.38    | 24 (63)                            | 0.83    | 15 (58)          | 0.62    | 21 (48)                  | 0.10    | 53 (82)                   | 0.06    | 183 (67)         |
|                               | Yes    | 19 (34)          | 11 (24)            |         | 14 (37)                            |         | 11 (42)          |         | 23 (52)                  |         | 12 (18)                   |         | 90 (33)          |
| Healthcare Provider           | No     | 48 (87)          | 26 (58)            | 0.001   | 31 (82)                            | 0.56    | 22 (85)          | 0.74    | 41 (93)                  | 0.51    | 55 (85)                   | 0.80    | 223 (82)         |
|                               | Yes    | 7 (13)           | 19 (42)            |         | 7 (18)                             |         | 4 (15)           |         | 3 (7)                    |         | 10 (15)                   |         | 50 (18)          |
| Non-governmental organisation | No     | 49 (89)          | 44 (98)            | 0.12    | 31 (82)                            | 0.37    | 25 (96)          | 0.42    | 41 (93)                  | 0.73    | 58 (89)                   | 1.00    | 248 (91)         |
|                               | Yes    | 6 (11)           | 1 (2)              |         | 7 (18)                             |         | 1 (4)            |         | 3 (7)                    |         | 7 (11)                    |         | 25 (9)           |
| Pharmaceutical Industry       | No     | 55 (100)         | 41 (91)            | 0.04    | 36 (95)                            | 0.16    | 23 (88)          | 0.03    | 44 (100)                 | 1.00    | 52 (80)                   | 0.0002  | 251 (92)         |
|                               | Yes    | 0 (0)            | 4 (9)              |         | 2 (5)                              |         | 3 (12)           |         | 0 (0)                    |         | 13 (20)                   |         | 22 (8)           |
| Regulatory Agency             | No     | 50 (91)          | 44 (98)            | 0.22    | 36 (95)                            | 0.22    | 26 (100)         | 0.17    | 42 (96)                  | 0.46    | 63 (97)                   | 0.24    | 261 (96)         |
|                               | Yes    | 5 (9)            | 1 (2)              |         | 2 (5)                              |         | 0 (0)            |         | 2 (4)                    |         | 2 (3)                     |         | 12 (4)           |
| UN agency                     | No     | 41 (75)          | 44 (98)            | 0.001   | 31 (82)                            | 0.003   | 23 (88)          | 0.24    | 39 (89)                  | 0.12    | 61 (94)                   | 0.004   | 239 (88)         |
|                               | Yes    | 14 (25)          | 1 (2)              |         | 7 (18)                             |         | 3 (12)           |         | 5 (11)                   |         | 4 (6)                     |         | 34 (12)          |
| Other                         | No     | 51 (93)          | 41 (91)            | 0.81    | 37 (97)                            | 0.71    | 25 (96)          | 1.00    | 39 (89)                  | 0.50    | 62 (95)                   | 0.70    | 255 (93)         |
|                               | Yes    | 4 (7)            | 4 (9)              |         | 1 (3)                              |         | 1 (4)            |         | 5 (11)                   |         | 3 (5)                     |         | 18 (7)           |

## Survey results

### Criteria weights

**sTable 12 Raw mean criteria weights**

P-values were obtained using t-tests to assess differences in means between “Africa” compared to other WHO regions.

Abbreviation: SD, Standard Deviation

| Criteria                                 | African<br>(n=55) | Americas<br>(n=45) |             | Eastern<br>Mediterranean<br>(n=38) |      | European(n=26)    |               | Southeast Asian<br>(n=44) |      | Western Pacific<br>(n=65) |             |
|------------------------------------------|-------------------|--------------------|-------------|------------------------------------|------|-------------------|---------------|---------------------------|------|---------------------------|-------------|
|                                          | Mean %<br>(SD)    | Mean %<br>(SD)     | P           | Mean %<br>(SD)                     | P    | Mean %<br>(SD)    | P             | Mean %<br>(SD)            | P    | Mean %<br>(SD)            | P           |
| Annual deaths in children under 5 years  | 14.2 (7.9)        | 16.4 (7.8)         | 0.18        | 15.0 (11)                          | 0.73 | <b>18.6 (7.8)</b> | <b>0.02</b>   | 14.0 (8.2)                | 0.88 | 14.3 (8.0)                | 0.96        |
| Annual deaths in people 5 years & older  | 11.5 (6.2)        | 13.4 (6.0)         | 0.14        | 11.9 (6.2)                         | 0.79 | 14.5 (7.3)        | 0.08          | 13.3 (5.2)                | 0.14 | <b>14.9 (8.4)</b>         | <b>0.01</b> |
| Years lived with disability              | 11.6 (5.3)        | 13.0 (6.5)         | 0.26        | 12.8 (5.2)                         | 0.29 | 13.9 (6.8)        | 0.13          | 11.0 (5.1)                | 0.56 | 12.7 (5.7)                | 0.29        |
| Social and economic burden per case      | 11.6 (5.9)        | <b>9.0 (4.9)</b>   | <b>0.02</b> | 10.6 (5.6)                         | 0.40 | 9.6 (5.1)         | 0.12          | 11.9 (4.8)                | 0.79 | 9.9 (5.5)                 | 0.10        |
| Disruption due to outbreaks              | 13.3 (6.5)        | 11.8 (5.9)         | 0.19        | 13.2 (6.8)                         | 0.88 | <b>7.4 (4.6)</b>  | <b>0.0001</b> | 12.6 (6.2)                | 0.56 | 12.4 (7.3)                | 0.44        |
| Contribution to inequity                 | 11.5 (6.4)        | 10.7 (6.0)         | 0.48        | 11.7 (7.3)                         | 0.90 | 8.4 (8.2)         | 0.09          | 12.0 (7.5)                | 0.12 | 11.7 (7.2)                | 0.90        |
| Contribution to antimicrobial resistance | 13.8 (6.6)        | 14.9 (7.1)         | 0.44        | 14.4 (8.2)                         | 0.74 | 15.5 (7.8)        | 0.36          | 13.6 (6.5)                | 0.85 | 11.8 (6.7)                | 0.10        |
| Unmet needs for prevention & treatment   | 12.3 (7.3)        | 10.9 (5.8)         | 0.31        | 10.5 (6.9)                         | 0.25 | 12.2 (7.8)        | 0.96          | 11.6 (5.3)                | 0.62 | 12.4 (6.7)                | 0.92        |

### Pathogen ranks by region

These lists are survey results intended to inform deliberations on regional and global priorities and should not be read as regional priorities in themselves.

sTable 13 Pathogen total weights and ranks by region

| Rank | African                                           |              | Americas                        |              | E. Med.                                                         |              |
|------|---------------------------------------------------|--------------|---------------------------------|--------------|-----------------------------------------------------------------|--------------|
|      | Pathogen                                          | Total weight | Pathogen                        | Total weight | Pathogen                                                        | Total weight |
| 1    | <i>Mycobacterium tuberculosis</i> (TB)            | 86.1%        | HIV-1                           | 71.8%        | TB                                                              | 82.4%        |
| 2    | <i>Plasmodium falciparum</i> (malaria)            | 86.0%        | <i>S aureus</i>                 | 67.8%        | <i>S aureus</i>                                                 | 59.4%        |
| 3    | Human immunodeficiency virus 1 (HIV-1)            | 82.7%        | <i>K pneumoniae</i>             | 58.2%        | <i>K pneumoniae</i>                                             | 57.4%        |
| 4    | <i>Klebsiella pneumoniae</i>                      | 63.4%        | ExPEC                           | 55.6%        | HIV-1                                                           | 57.2%        |
| 5    | <i>Staphylococcus aureus</i>                      | 62.9%        | TB                              | 54.7%        | <i>Leishmania</i>                                               | 56.2%        |
| 6    | <i>Shigella</i> species                           | 59.6%        | Group A streptococcus           | 46.7%        | ExPEC                                                           | 54.2%        |
| 7    | Non-typhoidal <i>Salmonella</i>                   | 59.2%        | <i>Shigella</i> species         | 42.5%        | <i>Shigella</i> species                                         | 48.8%        |
| 8    | Respiratory syncytial virus                       | 51.1%        | Respiratory syncytial virus     | 42.4%        | Hepatitis C virus                                               | 48.2%        |
| 9    | Extra-intestinal pathogenic <i>E coli</i> (ExPEC) | 50.7%        | Influenza                       | 42.0%        | Group A streptococcus                                           | 45.9%        |
| 10   | Group B streptococcus                             | 47.3%        | Hepatitis C virus               | 39.8%        | Norovirus                                                       | 39.1%        |
| 11   | Group A streptococcus                             | 45.1%        | Cytomegalovirus                 | 38.5%        | InPEC                                                           | 36.7%        |
| 12   | <i>Leishmania</i>                                 | 44.9%        | <i>P falciparum</i>             | 38.4%        | <i>N gonorrhoeae</i>                                            | 36.5%        |
| 13   | Hepatitis C virus                                 | 44.2%        | <i>Leishmania</i>               | 36.6%        | Influenza                                                       | 36.2%        |
| 14   | Schistosomes                                      | 44.0%        | Dengue virus                    | 36.3%        | Group B streptococcus                                           | 35.9%        |
| 15   | Norovirus                                         | 40.6%        | InPEC                           | 35.9%        | <i>P falciparum</i>                                             | 35.0%        |
| 16   | Influenza                                         | 40.5%        | <i>N gonorrhoeae</i>            | 35.6%        | Cytomegalovirus                                                 | 34.6%        |
| 17   | Intestinal pathogenic <i>E coli</i> (InPEC)       | 37.8%        | Group B streptococcus           | 35.1%        | <i>M leprae</i>                                                 | 33.3%        |
| 18   | <i>Neisseria gonorrhoeae</i>                      | 37.2%        | <i>M leprae</i>                 | 33.9%        | Respiratory syncytial virus                                     | 32.9%        |
| 19   | Cytomegalovirus                                   | 36.1%        | Chikungunya virus               | 33.6%        | Dengue virus                                                    | 31.5%        |
| 20   | Herpes simplex types 1 and 2 and                  | 34.9%        | Norovirus                       | 33.5%        | <i>C trachomatis</i>                                            | 30.5%        |
| 21   | <i>Mycobacterium leprae</i> (leprosy)             | (tied)       | Herpes simplex types 1 and 2    | 30.6%        | Non-typhoidal <i>Salmonella</i> and <i>Salmonella</i> Paratyphi | 29.9% (tied) |
| 22   | Dengue virus                                      | 33.5%        | Non-typhoidal <i>Salmonella</i> | 28.8%        |                                                                 |              |
| 23   | <i>Chlamydia trachomatis</i>                      | 32.2%        | <i>C trachomatis</i>            | 28.1%        | Schistosomes                                                    | 26.5%        |
| 24   | Chikungunya virus                                 | 30.8%        | Schistosomes                    | 25.2%        | Chikungunya virus                                               | 24.6%        |
| 25   | Hookworm                                          | 26.5%        | <i>Salmonella</i> Paratyphi     | 18.9%        | Hookworm                                                        | 23.8%        |
| 26   | <i>Salmonella</i> Paratyphi                       | 23.8%        | Hookworm                        | 18.6%        | Herpes simplex types 1 and 2                                    | 22.2%        |

| Rank | European                        |              | SE Asian                        |              | W. Pacific                      |              |
|------|---------------------------------|--------------|---------------------------------|--------------|---------------------------------|--------------|
|      | Pathogen                        | Total weight | Pathogen                        | Total weight | Pathogen                        | Total weight |
| 1    | <i>S aureus</i>                 | 69.0%        | TB                              | 96.6%        | TB                              | 85.5%        |
| 2    | TB                              | 65.2%        | HIV-1                           | 67.7%        | <i>S aureus</i>                 | 69.0%        |
| 3    | HIV-1                           | 60.6%        | <i>K pneumoniae</i>             | 64.9%        | HIV-1                           | 61.9%        |
| 4    | ExPEC                           | 58.3%        | <i>S aureus</i>                 | 61.8%        | Group A streptococcus           | 56.5%        |
| 5    | <i>K pneumoniae</i>             | 56.5%        | Group A streptococcus           | 60.8%        | <i>K pneumoniae</i>             | 55.5%        |
| 6    | Group A streptococcus           | 47.4%        | ExPEC                           | 59.2%        | ExPEC                           | 49.0%        |
| 7    | Cytomegalovirus                 | 44.9%        | Respiratory syncytial virus     | 52.5%        | Influenza                       | 48.5%        |
| 8    | Respiratory syncytial virus     | 43.4%        | <i>Shigella</i> species         | 49.5%        | Respiratory syncytial virus     | 48.3%        |
| 9    | Hepatitis C virus               | 38.2%        | Hepatitis C virus               | 49.2%        | Hepatitis C virus               | 43.3%        |
| 10   | <i>Shigella</i> species         | 36.3%        | Dengue virus                    | 45.9%        | Cytomegalovirus                 | 43.1%        |
| 11   | Norovirus                       | 33.6%        | Group B streptococcus           | 45.7%        | Dengue virus                    | 41.1%        |
| 12   | Influenza                       | 33.1%        | <i>Leishmania</i> and Influenza | 44.9% (tied) | <i>Shigella</i> species         | 39.3%        |
| 13   | <i>N gonorrhoeae</i>            | 32.4%        |                                 |              | Group B streptococcus           | 38.3%        |
| 14   | InPEC                           | 31.7%        | <i>P falciparum</i>             | 39.8%        | <i>M leprae</i>                 | 35.8%        |
| 15   | Group B streptococcus           | 28.2%        | <i>M leprae</i>                 | 38.5%        | Norovirus                       | 35.2%        |
| 16   | <i>C trachomatis</i>            | 27.2%        | Norovirus and InPEC             | 38.1% (tied) | InPEC                           | 34.4%        |
| 17   | <i>M leprae</i>                 | 26.4%        |                                 |              | <i>N gonorrhoeae</i>            | 34.2%        |
| 18   | Non-typhoidal <i>Salmonella</i> | 25.2%        | <i>N gonorrhoeae</i>            | 37.7%        | Herpes simplex types 1 and 2    | 31.0%        |
| 19   | Herpes simplex types 1 and 2    | 24.1%        | Cytomegalovirus                 | 37.4%        | <i>P falciparum</i>             | 30.2%        |
| 20   | Chikungunya virus               | 23.2%        | Chikungunya virus               | 33.9%        | Chikungunya virus               | 28.8%        |
| 21   | <i>Leishmania</i>               | 20.9%        | <i>C trachomatis</i>            | 32.9%        | Non-typhoidal <i>Salmonella</i> | 28.4%        |
| 22   | Hookworm                        | 16.2%        | <i>Salmonella</i> Paratyphi     | 30.9%        | <i>Leishmania</i>               | 24.5%        |
| 23   | <i>Salmonella</i> Paratyphi     | 15.1%        | Herpes simplex types 1 and 2    | 30.1%        | Hookworm                        | 23.4%        |
| 24   | Dengue virus                    | 10.4%        | Non-typhoidal <i>Salmonella</i> | 27.7%        | Schistosomes                    | 22.8%        |
| 25   | <i>P falciparum</i>             | 2.2%         | Schistosomes                    | 24.4%        | <i>Salmonella</i> Paratyphi     | 22.6%        |
| 26   | Schistosomes                    | 1.1%         | Hookworm                        | 24.1%        | <i>C trachomatis</i>            | 22.3%        |



**sTable 14 Robustness testing results**

See sTable 1 for abbreviations. ✓: retained in Global list, ✗: drops from Global List

| Global list           | Testing conditions       |                          |                                        |                                          |                                                    |                                                           |                                  |                               |                                               |                                             |
|-----------------------|--------------------------|--------------------------|----------------------------------------|------------------------------------------|----------------------------------------------------|-----------------------------------------------------------|----------------------------------|-------------------------------|-----------------------------------------------|---------------------------------------------|
|                       | Cluster 1 responses only | Cluster 2 responses only | Omit Annual deaths in children under 5 | Omit Annual deaths in people 5 and older | Omit Annual years lived with disability (all ages) | Omit Social and economic burden due to outbreaks per case | Omit Disruption due to outbreaks | Omit Contribution to inequity | Omit Contribution to antimicrobial resistance | Omit Unmet needs for prevention & treatment |
| Cytomegalovirus       | ✓                        | ✓                        | ✓                                      | ✓                                        | ✓                                                  | ✓                                                         | ✓                                | ✓                             | ✓                                             | ✓                                           |
| Dengue virus          | ✓                        | ✗                        | ✓                                      | ✗                                        | ✓                                                  | ✓                                                         | ✗                                | ✓                             | ✗                                             | ✓                                           |
| ExPEC                 | ✓                        | ✓                        | ✓                                      | ✓                                        | ✓                                                  | ✓                                                         | ✓                                | ✓                             | ✓                                             | ✓                                           |
| GAS                   | ✓                        | ✓                        | ✓                                      | ✓                                        | ✓                                                  | ✓                                                         | ✓                                | ✓                             | ✓                                             | ✓                                           |
| GBS                   | ✗                        | ✓                        | ✗                                      | ✓                                        | ✓                                                  | ✓                                                         | ✓                                | ✓                             | ✓                                             | ✗                                           |
| Hepatitis C virus     | ✓                        | ✓                        | ✓                                      | ✓                                        | ✓                                                  | ✓                                                         | ✓                                | ✓                             | ✓                                             | ✓                                           |
| HIV-1                 | ✓                        | ✓                        | ✓                                      | ✓                                        | ✓                                                  | ✓                                                         | ✓                                | ✓                             | ✓                                             | ✓                                           |
| Influenza             | ✓                        | ✓                        | ✓                                      | ✓                                        | ✓                                                  | ✓                                                         | ✓                                | ✓                             | ✓                                             | ✓                                           |
| <i>K pneumoniae</i>   | ✓                        | ✓                        | ✓                                      | ✓                                        | ✓                                                  | ✓                                                         | ✓                                | ✓                             | ✓                                             | ✓                                           |
| <i>Leishmania</i>     | ✓                        | ✓                        | ✓                                      | ✓                                        | ✓                                                  | ✓                                                         | ✓                                | ✓                             | ✓                                             | ✓                                           |
| <i>M tuberculosis</i> | ✓                        | ✓                        | ✓                                      | ✓                                        | ✓                                                  | ✓                                                         | ✓                                | ✓                             | ✓                                             | ✓                                           |
| NTS                   | ✓                        | ✓                        | ✓                                      | ✓                                        | ✓                                                  | ✓                                                         | ✓                                | ✓                             | ✓                                             | ✓                                           |
| Norovirus             | ✓                        | ✗                        | ✓                                      | ✗                                        | ✓                                                  | ✓                                                         | ✗                                | ✓                             | ✓                                             | ✓                                           |
| <i>P falciparum</i>   | ✓                        | ✓                        | ✓                                      | ✓                                        | ✓                                                  | ✓                                                         | ✓                                | ✓                             | ✓                                             | ✓                                           |
| RSV                   | ✓                        | ✓                        | ✗                                      | ✓                                        | ✓                                                  | ✓                                                         | ✓                                | ✓                             | ✓                                             | ✓                                           |
| <i>Shigella</i>       | ✓                        | ✓                        | ✓                                      | ✓                                        | ✓                                                  | ✓                                                         | ✓                                | ✓                             | ✓                                             | ✓                                           |
| <i>S aureus</i>       | ✓                        | ✓                        | ✓                                      | ✓                                        | ✓                                                  | ✓                                                         | ✓                                | ✓                             | ✓                                             | ✓                                           |
| Added pathogens       | none                     | none                     | InPEC                                  | InPEC                                    | InPEC<br><i>N gonorrhoeae</i>                      | none                                                      | <i>M leprae</i>                  | none                          | none                                          | InPEC                                       |

## Use Cases and Action Categories

Use cases and category assignments were reviewed and endorsed by PDVAC in December 2023. For full supporting data, see the report to PDVAC at [www.technet-21.org/en/resources/report/vaccine-r-d-priorities-vaccine-use-cases-and-action-categories-for-pdvac-input-december-2024](http://www.technet-21.org/en/resources/report/vaccine-r-d-priorities-vaccine-use-cases-and-action-categories-for-pdvac-input-december-2024). Any references to commercial products or trademarks are for tracking purposes only and not intended to reflect WHO product recommendations.

**sTable 15 Use cases and Action Categories for pathogens on the Global list**

| Pathogen                                          | Use Case                                                                                                                                                                                                          | Action Category (as of December 2023) |                                      |                                    |
|---------------------------------------------------|-------------------------------------------------------------------------------------------------------------------------------------------------------------------------------------------------------------------|---------------------------------------|--------------------------------------|------------------------------------|
|                                                   |                                                                                                                                                                                                                   | Research                              | Advance Product Development          | Prepare to Implement               |
| <i>Totals</i>                                     |                                                                                                                                                                                                                   | <i>10 use cases<br/>6 pathogens</i>   | <i>17 use cases<br/>10 pathogens</i> | <i>7 use cases<br/>5 pathogens</i> |
| Cytomegalovirus                                   | Prevention and/or modification of sequelae associated with congenital CMV, by vaccinating women and girls prior to pregnancy <sup>1</sup>                                                                         |                                       | X                                    |                                    |
| Dengue virus                                      | Vaccine for dengue naïve and seropositive individuals, to prevent dengue febrile illness induced by any dengue serotype <sup>2</sup>                                                                              |                                       |                                      | X                                  |
| Extra-intestinal pathogenic <i>E coli</i> (ExPEC) | Prevention of invasive <i>E coli</i> disease, including urinary tract infections or bacteraemia, in high-risk populations <sup>3</sup>                                                                            |                                       |                                      | X                                  |
|                                                   | Maternal immunisation during pregnancy to prevent invasive <i>E coli</i> disease, such as neonatal sepsis and meningitis, in neonates and young infants ( <i>informed by PDVAC deliberations</i> )                | X                                     |                                      |                                    |
| Group A strep (GAS)                               | Prevention of GAS disease: pharyngitis, impetigo and invasive disease in young children. Potential for prevention of GAS immune-mediated sequelae: acute rheumatic fever and rheumatic heart disease <sup>4</sup> | X                                     |                                      |                                    |
| Group B strep (GBS)                               | Maternal immunisation during pregnancy to prevent GBS-related stillbirth and invasive GBS disease in neonates and young infants <sup>5</sup>                                                                      |                                       |                                      | X                                  |
|                                                   | Prevention of Group B streptococcal infections in older adults <sup>6</sup>                                                                                                                                       | X                                     |                                      |                                    |
| Hepatitis C virus                                 | Prevention of chronic hepatitis C infection for persons at risk <sup>7</sup>                                                                                                                                      | X                                     |                                      |                                    |
|                                                   | Therapeutic vaccines to improve treatment outcomes for chronic HCV infections <sup>8</sup>                                                                                                                        | X                                     |                                      |                                    |
| HIV-1                                             | Prevention of HIV in high-risk populations ( <i>informed by clinical trials</i> )                                                                                                                                 | X                                     |                                      |                                    |
|                                                   | Treatment and/or cure of HIV infection in HIV-1 positive individuals (includes vaccines, mAbs, and combined approaches) ( <i>informed by clinical trials</i> )                                                    | X                                     |                                      |                                    |

| Pathogen                                                                                                                                                          | Use Case                                                                                                                                                                                                                                                                                                                                                                                                                                     | Action Category (as of December 2023) |                             |                      |
|-------------------------------------------------------------------------------------------------------------------------------------------------------------------|----------------------------------------------------------------------------------------------------------------------------------------------------------------------------------------------------------------------------------------------------------------------------------------------------------------------------------------------------------------------------------------------------------------------------------------------|---------------------------------------|-----------------------------|----------------------|
|                                                                                                                                                                   |                                                                                                                                                                                                                                                                                                                                                                                                                                              | Research                              | Advance Product Development | Prepare to Implement |
|                                                                                                                                                                   | Preventive mAbs for HIV-1 infection in confirmed HIV-negative individuals at substantial risk of HIV infection and their sexual partners and/or prevention of HIV-1 infection in neonates and infants with HIV exposure <sup>9</sup>                                                                                                                                                                                                         | X                                     |                             |                      |
| Influenza<br>Note: Preferred product characteristics for influenza vaccines are currently being revised. Once they are available these use cases will be updated. | Universal-type (“broadly protective”) influenza A vaccines for prevention of severe influenza illness caused by human influenza A virus infection in persons aged 6 weeks and older belonging to a group at high risk for severe influenza illness (children aged 6 weeks through 59 months, elderly adults, persons with chronic medical conditions, and pregnant women). Duration of efficacy should be a minimum of 5 years <sup>10</sup> |                                       | X                           |                      |
|                                                                                                                                                                   | Improved seasonal influenza vaccines, with a duration of protection of at least one year <sup>10</sup>                                                                                                                                                                                                                                                                                                                                       |                                       | X                           |                      |
| <i>K pneumoniae</i>                                                                                                                                               | Vaccine administered during pregnancy to prevent neonatal sepsis caused by the major disease-causing serotypes of <i>K pneumoniae</i> <sup>11,12</sup>                                                                                                                                                                                                                                                                                       | X                                     |                             |                      |
|                                                                                                                                                                   | Preventing <i>K pneumoniae</i> -attributable disease, including pneumonia, bloodstream infections, and/or urinary tract infections in high-risk populations such as older adults, the immunocompromised, and those with anticipated prolonged hospital stay or planned surgeries <sup>12,13</sup>                                                                                                                                            | X                                     |                             |                      |
| <i>Leishmania</i> species                                                                                                                                         | Prevention of visceral leishmaniasis and/or cutaneous leishmaniasis in all age groups in endemic regions starting from 6 months of age, and/or prevention or treatment of post-kala azar dermal leishmaniasis <sup>14</sup>                                                                                                                                                                                                                  |                                       | X                           |                      |
| <i>M tuberculosis</i>                                                                                                                                             | Prevention of active pulmonary TB disease (with or without evidence of latent infection), including in those with HIV infection <sup>15</sup>                                                                                                                                                                                                                                                                                                |                                       |                             | X                    |
|                                                                                                                                                                   | Prevention of TB disease in infants and young children, including in infants with HIV infection <sup>15</sup>                                                                                                                                                                                                                                                                                                                                |                                       |                             | X                    |
|                                                                                                                                                                   | Adjunctive treatment of TB, or to prevent relapse following cure in patients being treated for active TB, both drug sensitive and drug resistant strains <sup>16</sup>                                                                                                                                                                                                                                                                       |                                       | X                           |                      |
| Non-typhoidal <i>Salmonella</i>                                                                                                                                   | Paediatric vaccines for prevention of invasive disease caused by non-typhoidal <i>Salmonella</i> in children aged 6 – 36 months <sup>17</sup>                                                                                                                                                                                                                                                                                                |                                       | X                           |                      |
|                                                                                                                                                                   | Prevention of invasive disease caused by non-typhoidal <i>Salmonella</i> in other individuals at high risk, including immunocompromised individuals, children over 36 months, the elderly, immunocompromised individuals, and persons living or traveling in settings with poor sanitation and hygiene <sup>17</sup>                                                                                                                         |                                       | X                           |                      |
| Norovirus                                                                                                                                                         | Prevention of norovirus acute gastroenteritis for children in all countries from 6 weeks of age <sup>18</sup>                                                                                                                                                                                                                                                                                                                                |                                       | X                           |                      |

| Pathogen                | Use Case                                                                                                                                                                                                                                                                                                                                                                                                                     | Action Category (as of December 2023) |                             |                      |
|-------------------------|------------------------------------------------------------------------------------------------------------------------------------------------------------------------------------------------------------------------------------------------------------------------------------------------------------------------------------------------------------------------------------------------------------------------------|---------------------------------------|-----------------------------|----------------------|
|                         |                                                                                                                                                                                                                                                                                                                                                                                                                              | Research                              | Advance Product Development | Prepare to Implement |
|                         | Prevention of norovirus acute gastroenteritis for adolescents, adults, and/or older persons in all countries (including travellers) <sup>18</sup>                                                                                                                                                                                                                                                                            |                                       | X                           |                      |
| <i>P. falciparum</i>    | Prevention of blood-stage infection due to <i>P. falciparum</i> malaria at the individual level, for populations or age groups who experience high incidence of infection <sup>19</sup>                                                                                                                                                                                                                                      |                                       | X                           |                      |
|                         | Prevention of malaria transmission at the community level for children and adults, including women of childbearing age, who represent the infectious reservoir and will need to be targeted to maximize the vaccine's impact on transmission <sup>19</sup>                                                                                                                                                                   |                                       | X                           |                      |
|                         | mAbs for prevention of blood-stage infection due to <i>P. falciparum</i> at the individual level, and/or reduction of clinical malaria, including severe malaria and death due to <i>P. falciparum</i> <sup>19</sup>                                                                                                                                                                                                         |                                       | X                           |                      |
| RSV                     | Active immunisation of women during pregnancy, for prevention of severe RSV disease in offspring during the neonatal period and early infancy <sup>20</sup>                                                                                                                                                                                                                                                                  |                                       |                             | X                    |
|                         | Active immunisation of infants, for prevention of RSV disease in infants and young children <sup>20</sup>                                                                                                                                                                                                                                                                                                                    |                                       | X                           |                      |
|                         | mAbs for prevention of severe RSV disease for all infants in the first 6 months of life and for high-risk young children entering their second RSV season (e.g with chronic heart or chronic lung disease) <sup>21</sup>                                                                                                                                                                                                     |                                       |                             | X                    |
| <i>Shigella</i> species | Prevention of moderate to severe diarrhoea due to <i>Shigella</i> in infants from 6 months and children up to 36 months of age <sup>22,23</sup>                                                                                                                                                                                                                                                                              |                                       | X                           |                      |
|                         | Prevention of <i>Shigella</i> -attributable dysentery and diarrhoea for high-risk populations such as travellers and the military, communities with high incidence, elderly and institutionalized individuals, and/or pregnant women <sup>22,23</sup>                                                                                                                                                                        |                                       | X                           |                      |
| <i>S. aureus</i>        | Prevention of severe infection in populations at risk, such as children, those over 60 years of age, and/or those in all age groups who are immunocompromised, experiencing recurrent skin and soft tissue infections, suffering from relevant comorbidities, exposed to epidemic strains, diabetics, or undergoing elective surgery or other invasive procedures with high risk of <i>S. aureus</i> infection <sup>24</sup> |                                       | X                           |                      |
|                         | mAbs for prevention or treatment of disease caused by <i>S. aureus</i> , such as severe pneumonia and/or superinfection in conjunction with viral pneumonia <sup>25,26</sup>                                                                                                                                                                                                                                                 |                                       | X                           |                      |

## Detailed methods for assessing predictors and cluster patterns in MCDA-generated criteria weights

### Overview

The primary goals of this portion of the study analysis included determining: (1) whether participant characteristics were associated with their reported weights for each of the eight areas of prioritization, (2) if groups of respondents shared similar overall patterns in criteria weights, and (3) if groups of respondents sharing similar patterns in criteria weights also shared similar biographical backgrounds or impressions of the survey.

Data from 577 survey responses submitted from November 15, 2022 to May 1, 2023 were extracted from the 1000Minds website (<https://www.1000minds.com>, Last Accessed: August 29, 2023). Data was anonymized prior to use. Analysis was limited to the first regional survey submission by a participant in which all trade-off questions and the post-survey had been completed. Biographical information was self-reported by participants and was not verified for this analysis.

### Outcomes

The first set of outcomes (used to identify participant characteristics associated with MCDA-generated weights) included **criteria weights calculated by the 1000minds tool across the “Very high” level for the eight criteria for prioritization**, namely *Annual deaths in children under five years*, *Annual deaths in people five years and older*, *Years lived with disability for all ages*, *Social and economic burden per case*, *Disruption due to outbreaks*, *Contribution to inequity*, *Contribution to antimicrobial resistance*, and *Unmet needs for prevention and treatment*.

The second set of outcomes (used to identify cluster patterns in criteria weights) was a **composite indicator of Medium and Very high levels for each of the eight criteria**. We generated the indicator using Principal Components Analysis (PCA) on weights generated by MCDA to allow both levels of criteria weights to be integrated into the same cluster model while avoiding issues of collinearity between measured scores. The composite indicator of MCDA criteria weights included the first set of eigenvectors accounting for at least 80 percent of the explained variance in the PCA model. Construction of the composite indicator was performed using the R packages ‘stats’ (version 4.3.1) and ‘factoextra’ (version 1.0.7), and ‘FactoMineR’ (version 2.11).<sup>27,28</sup>

The third set of outcomes (used to characterize potential predictors of cluster patterns) was a **participant’s membership in a specific cluster of survey respondents**, determined based on groups identified through k-means clustering (goal 2) of the composite indicator of criteria weights.

### Potential predictors of criteria weights and their cluster patterns

**Participant’s Background:** Participant characteristics considered in the analysis included: language of survey (English, Arabic, Chinese, French, Portuguese, Russian, Spanish), WHO region of survey (Africa, Americas, Eastern Mediterranean, Europe, South-East Asia, Western Pacific), a participant’s years of experience (up to 10 years, 11 to 20 years, 21 to 30 years, more than 30 years), their expertise (or not) in the fields of disease epidemiology, economics and health financing, health care, health policy, regulatory affairs, vaccine research and development, or another field; type of organisations that a participant works for (or not) including an academic institution, funding agency, government, health care provider, non-governmental organisation, pharmaceutical industry, regulatory agency, United Nations agency, or other entity; as well as eligibility status for Gavi support in 2023 (initial self-financing, preparatory transition, accelerated transition, not eligible) and World Bank group classification by income level in 2023 (low income, lower middle income, upper middle income, high income) for the participant’s country of work. Participants who selected “Other” for expertise or type of organisation were provided the opportunity to give additional information in a comment field. When descriptions in these fields corresponded to existing categories for expertise or type of organisation, these responses were reassigned to those categories. Gavi eligibility and World Bank income group classifications were inferred based on the participant’s self-reported country of work.

**Face Validity of Survey:** Factors linked to a participant’s face-validity assessment of the MCDA survey were also assessed based on responses to the following questions in the post-survey: “Was the survey easy or difficult to understand?” (very difficult, difficult, neutral, easy, very easy); “Does the order of criteria in the bar chart seem correct to you?” (no, not sure, yes); and “Does the order of pathogens listed seem reasonable to you?” (no, not sure, yes).

### ***Statistical analysis***

Categorical data were presented as numbers and percentages. Continuous data were summarized as means with standard deviation. Differences in proportions and means were assessed using Chi-square/Fisher's Exact Test and t-test, respectively. To assess for potential selection bias due to incomplete surveys, a generalized estimating equation (GEE) with a binomial distribution and logit function was used to assess associations between participant characteristics and completion of trade-off questions after accounting for multiple responses per person. GEE was performed using the R package 'gee' (version 4.13-25).<sup>29</sup>

To **determine if participant characteristics were associated with their reported weights** for each of the eight criteria, multivariate linear regression was used to model mean differences in weights by a participant's years of experience (reference: up to 10 years); expertise in each of six areas (reference: not in the listed area); employment in each of nine types of organisations (reference: does not work for specified type of organisation); 2023 eligibility for Gavi support (reference: not eligible) and World Bank group classification (reference: high income) for the participant's country of work; language of survey (reference: English); WHO region of survey (reference: Africa); whether the survey was easy or difficult to understand (reference: neutral); if the order of criteria weights were correct (reference: yes); and, if pathogen rankings were reasonable (reference: yes). Multivariate linear regression was performed using the R package 'stats' (version 4.3.1).<sup>27</sup>

To **characterize group patterns in criteria weights**, K-means algorithm (an unsupervised machine learning method) was used to identify groups of survey respondents sharing similar sets of criteria weights. Optimal number of clusters was determined based on consensus of cut-off values using the elbow method, silhouette coefficient, Gap statistic and NbClust with centroid values ranging from 0 to 25.<sup>30-33</sup> Cluster analysis was performed using the R packages 'stats' (version 4.3.1), 'factoextra' (version 1.0.7), and "NbClust" (version 3.0.1).<sup>27,28,33</sup>

To **assess whether groups of respondents sharing similar patterns in criteria weights also shared similar biographical backgrounds or impressions of the survey**, a generalized linear model (GLM) with a binomial distribution and logit link function (based on the two-cluster model) was used to compare odds of membership in a specific cluster by years of experience, language and WHO region of survey, field of expertise, eligibility for Gavi support and World Bank income group classifications for country of work, type of work organisation, and face-validity assessment. GLM was performed using the R package 'stats' (version 4.3.1).<sup>27</sup>

Statistical power calculations for this analysis suggest that the minimum detectable odds ratio for membership in a specific cluster (based on two-cluster model) for the GLM analysis is between 0.213 and 2.475. The estimate is based on a sample size of 95 subjects in one cluster, 178 subjects in a reference cluster, a 15% likelihood of presenting a specific background characteristic, 80% statistical power and a two-sided significance level of 0.05.

Analysis was completed using R version 4.2.2 (R Foundation for Statistical Computing, Vienna, Austria).

## Detailed results from assessing predictors and cluster patterns in MCDA-generated criteria weights

### Determining if participant characteristics were associated with their reported weights

**sFigure 10 Adjusted mean difference in criteria weights by region, Criteria 1-4 (n=273)**

Multivariate linear regression was used to compare mean differences in criteria weights by participant characteristics. Analysis was based on first survey submission per survey type by a participant in which all trade-off questions and post-survey were complete. Models were adjusted for years of experience, language and WHO region of survey, field of expertise, eligibility for Gavi support and World Bank group classifications for country of work, type of work organisation, and participant's assessment regarding ease or difficulty to understand survey. Criteria weights are expressed as a percentage. Bars on plot indicate 95% confidence interval.

Abbreviations: MD, Mean Difference; CI, Confidence Interval; SD, Standard Deviation; No., Number of Participants; E. Med., Eastern Mediterranean; SE Asian, South East Asian; W. Pacific, Western Pacific

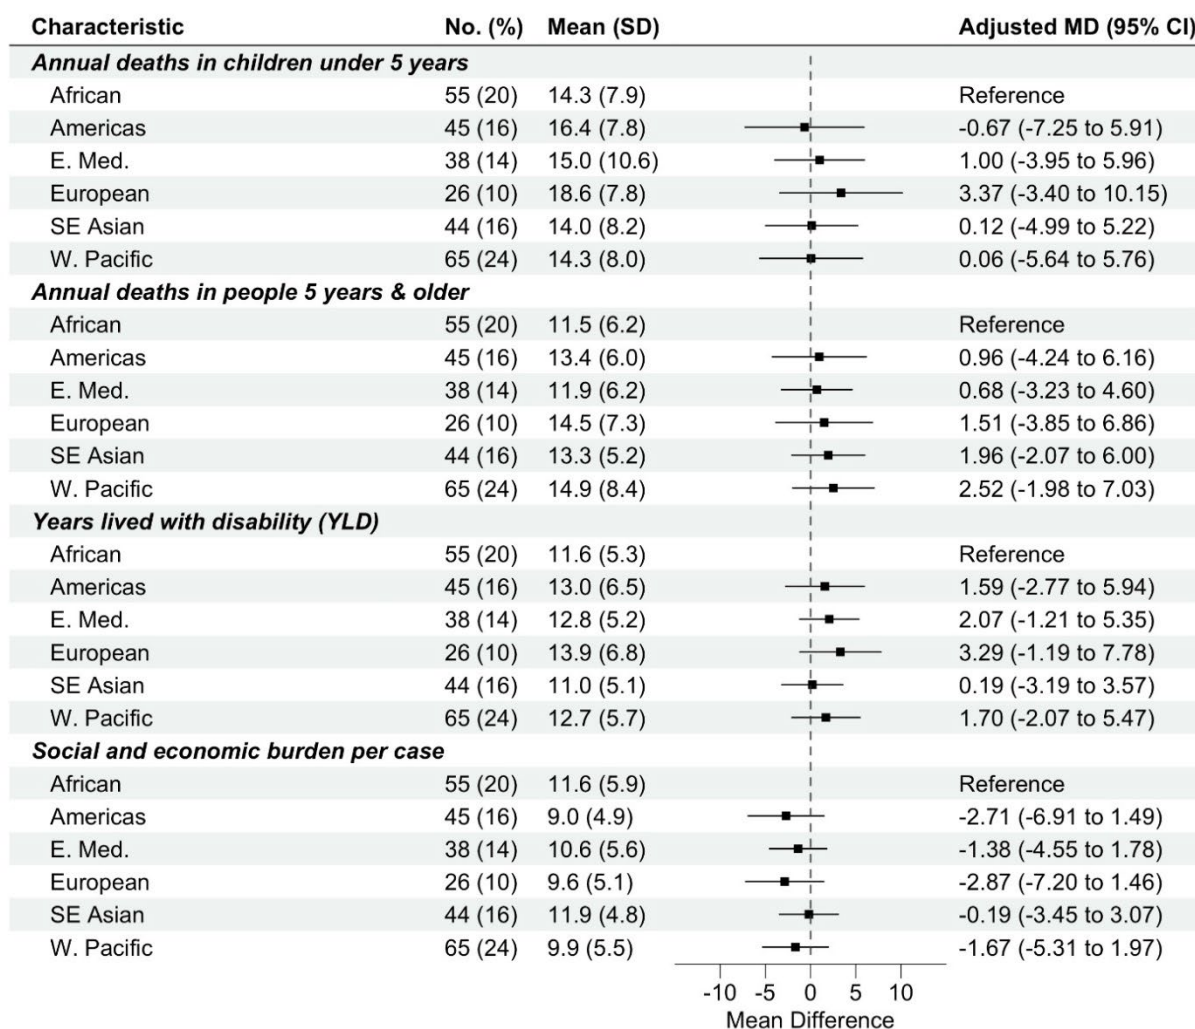

**sFigure 11 Adjusted mean difference in criteria weights by region, Criteria 5-8 (n=273)**

Multivariate linear regression was used to compare mean differences in criteria weights by participant characteristics. Analysis was based on first survey submission per survey type by a participant in which all trade-off questions and post-survey were complete. Models were adjusted for years of experience, language and WHO region of survey, field of expertise, eligibility for Gavi support and World Bank group classifications for country of work, type of work organisation, and participant's assessment regarding ease or difficulty to understand survey. Criteria weights are expressed as a percentage. Bars on plot indicate 95% confidence interval.

Abbreviations: MD, Mean Difference; CI, Confidence Interval; SD, Standard Deviation; No., Number of Participants; E. Med., Eastern Mediterranean; SE Asian, South East Asian; W. Pacific, Western Pacific

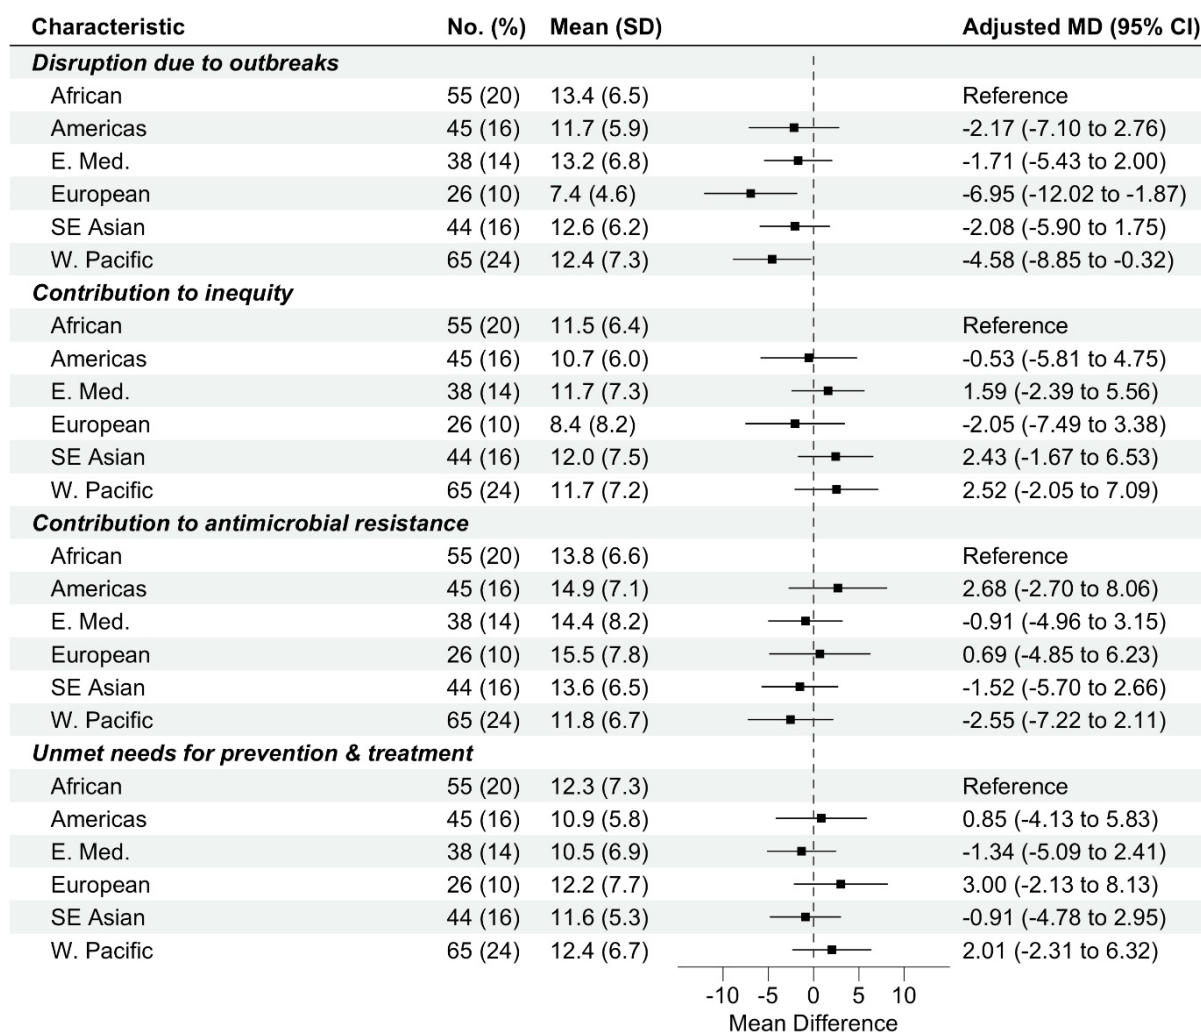



**sFigure 12 Adjusted mean difference in criteria weights by language of survey, Criteria 1-4 (n=273)**

Multivariate linear regression was used to compare mean differences in criteria weights by participant characteristics. Analysis was based on first survey submission per survey type by a participant in which all trade-off questions and post-survey were complete. Models were adjusted for years of experience, language and WHO region of survey, field of expertise, eligibility for Gavi support and World Bank group classifications for country of work, type of work organisation, and participant's assessment regarding ease or difficulty to understand survey. Criteria weights are expressed as a percentage. Bars on plot indicate 95% confidence interval.

Abbreviations: MD, Mean Difference; CI, Confidence Interval; SD, Standard Deviation; No., Number of Participants

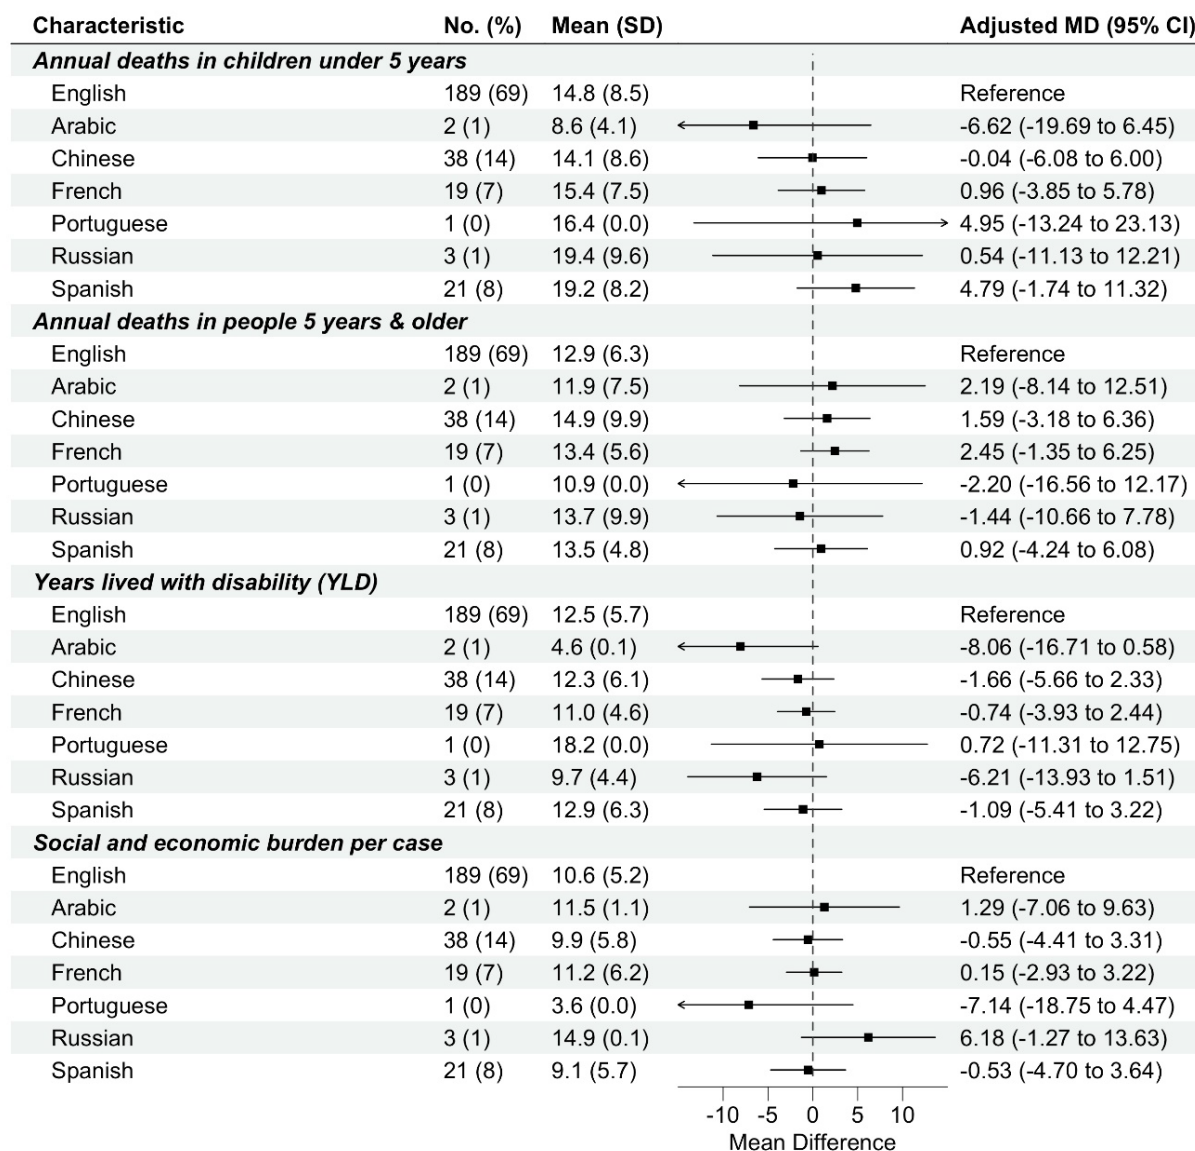

**sFigure 13 Adjusted mean difference in criteria weights by language of survey, Criteria 5-8 (n=273)**

Multivariate linear regression was used to compare mean differences in criteria weights by participant characteristics. Analysis was based on first survey submission per survey type by a participant in which all trade-off questions and post-survey were complete. Models were adjusted for years of experience, language and WHO region of survey, field of expertise, eligibility for Gavi support and World Bank group classifications for country of work, type of work organisation, and participant's assessment regarding ease or difficulty to understand survey. Criteria weights are expressed as a percentage. Bars on plot indicate 95% confidence interval.

Abbreviations: MD, Mean Difference; CI, Confidence Interval; SD, Standard Deviation; No., Number of Participants

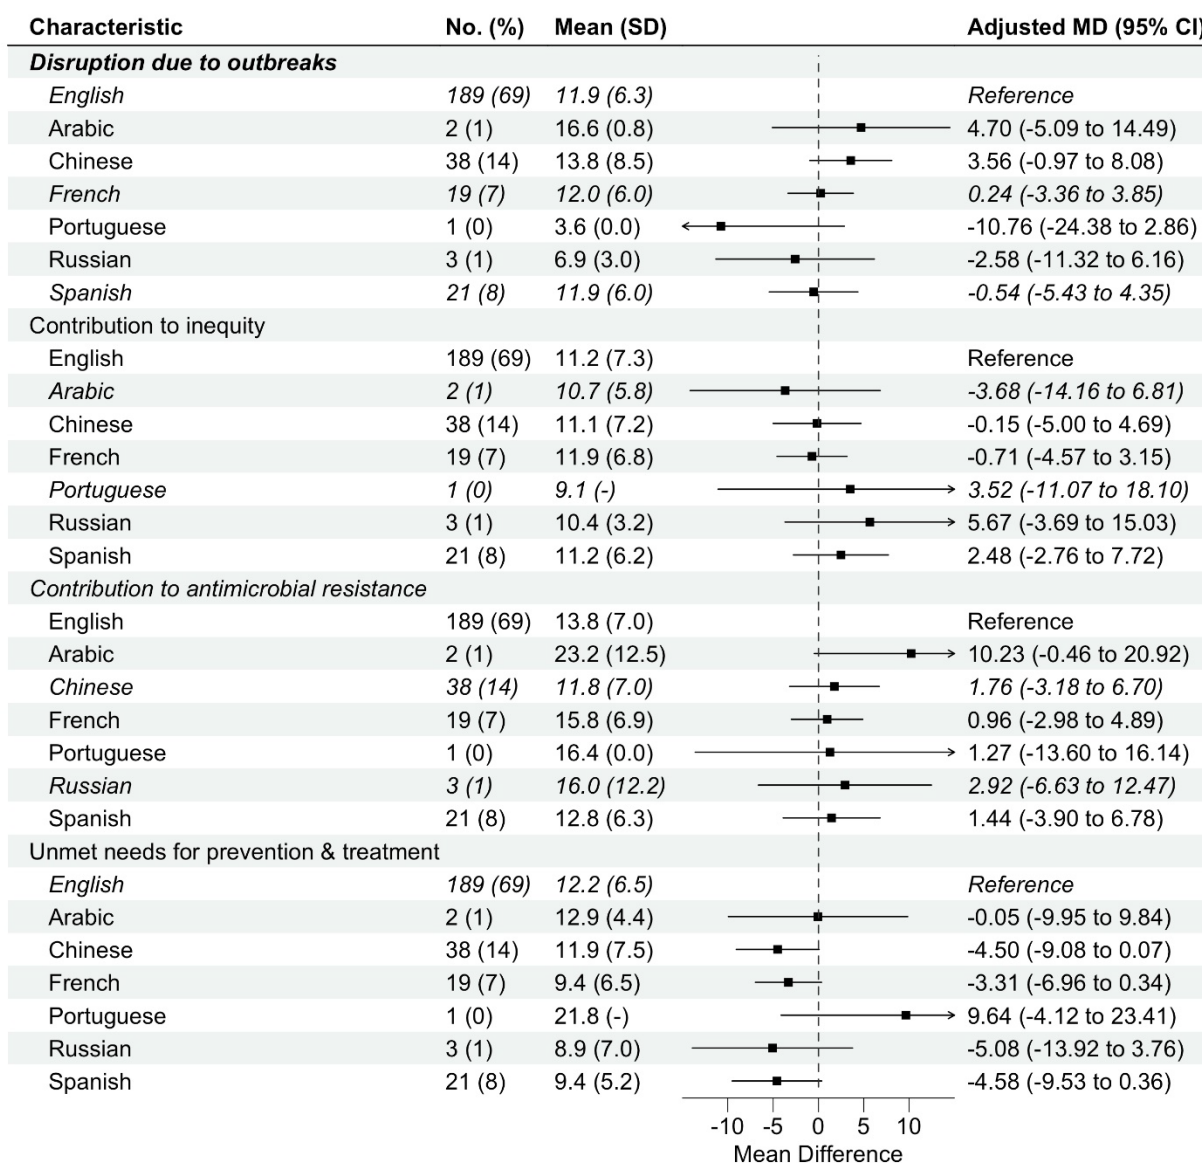

**sFigure 14 Adjusted mean difference in criteria weights by participant characteristics: Years of experience (n=273)**

Multivariate linear regression was used to compare mean differences in criteria weights by participant characteristics. Analysis was based on first survey submission per survey type by a participant in which all trade-off questions and post-survey were complete. Models were adjusted for years of experience, language and WHO region of survey, field of expertise, eligibility for Gavi support and World Bank group classifications for country of work, type of work organisation, and participant's assessment regarding ease or difficulty to understand survey. Criteria weights are expressed as a percentage. Bars on plot indicate 95% confidence interval.

Abbreviations: MD, Mean Difference; CI, Confidence Interval; SD, Standard Deviation; No., Number of Participants

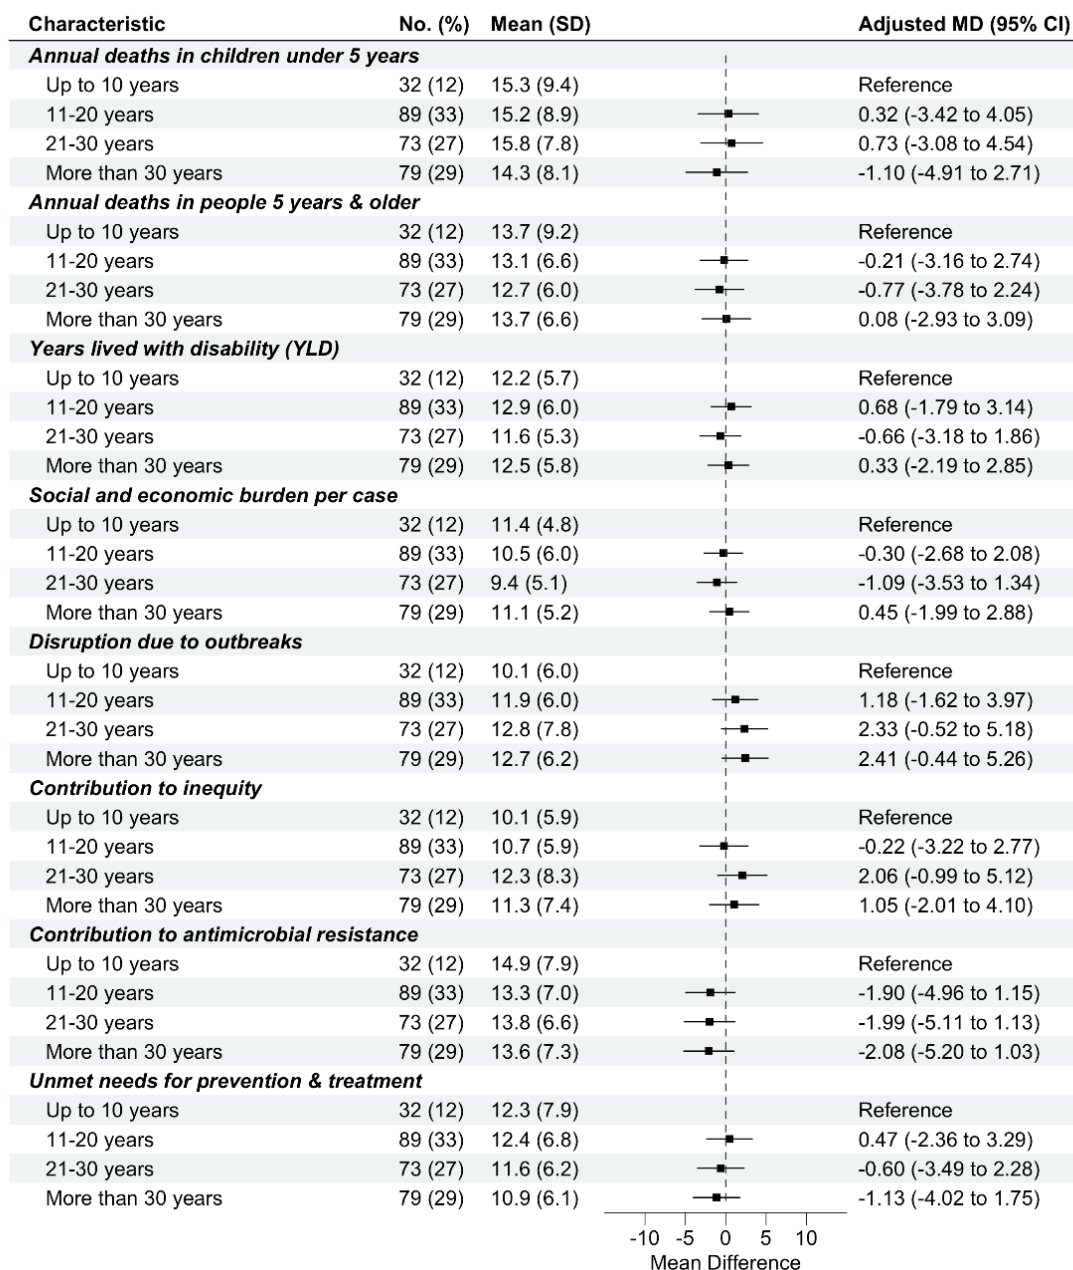

**sFigure 15 Adjusted mean difference in criteria weights by participant characteristics: Areas of expertise and Annual deaths in children under 5 years (n=273)**

Multivariate linear regression was used to compare mean differences in criteria weights by participant characteristics. Analysis was based on first survey submission per survey type by a participant in which all trade-off questions and post-survey were complete. Models were adjusted for years of experience, language and WHO region of survey, field of expertise, eligibility for Gavi support and World Bank group classifications for country of work, type of work organisation, and participant’s assessment regarding ease or difficulty to understand survey. Criteria weights are expressed as a percentage. Bars on plot indicate 95% confidence interval.

Abbreviations: MD, Mean Difference; CI, Confidence Interval; SD, Standard Deviation; No., Number of Participants; Econ, Economics; R&D, Research and Development

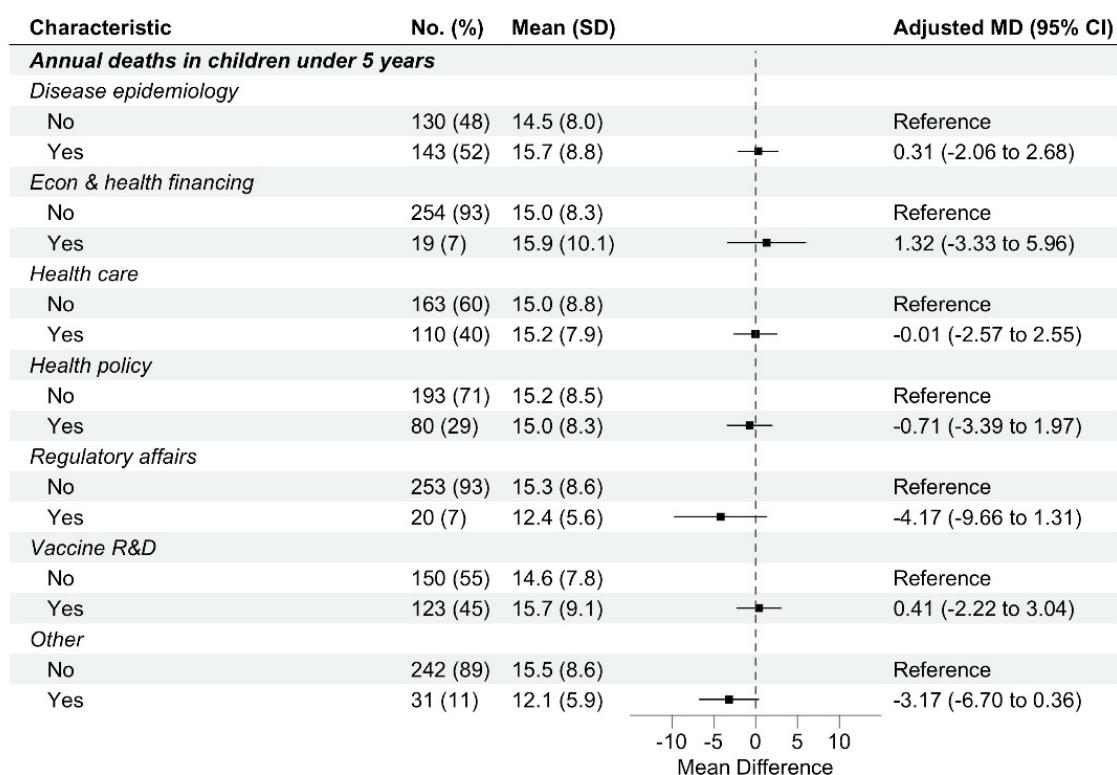

**sFigure 16 Adjusted mean difference in criteria weights by participant characteristics: Areas of expertise and Annual deaths in people 5 years and older (n=273)**

Multivariate linear regression was used to compare mean differences in criteria weights by participant characteristics. Analysis was based on first survey submission per survey type by a participant in which all trade-off questions and post-survey were complete. Models were adjusted for years of experience, language and WHO region of survey, field of expertise, eligibility for Gavi support and World Bank group classifications for country of work, type of work organisation, and participant’s assessment regarding ease or difficulty to understand survey. Criteria weights are expressed as a percentage. Bars on plot indicate 95% confidence interval.

Abbreviations: MD, Mean Difference; CI, Confidence Interval; SD, Standard Deviation; No., Number of Participants; Econ, Economics; R&D, Research and Development

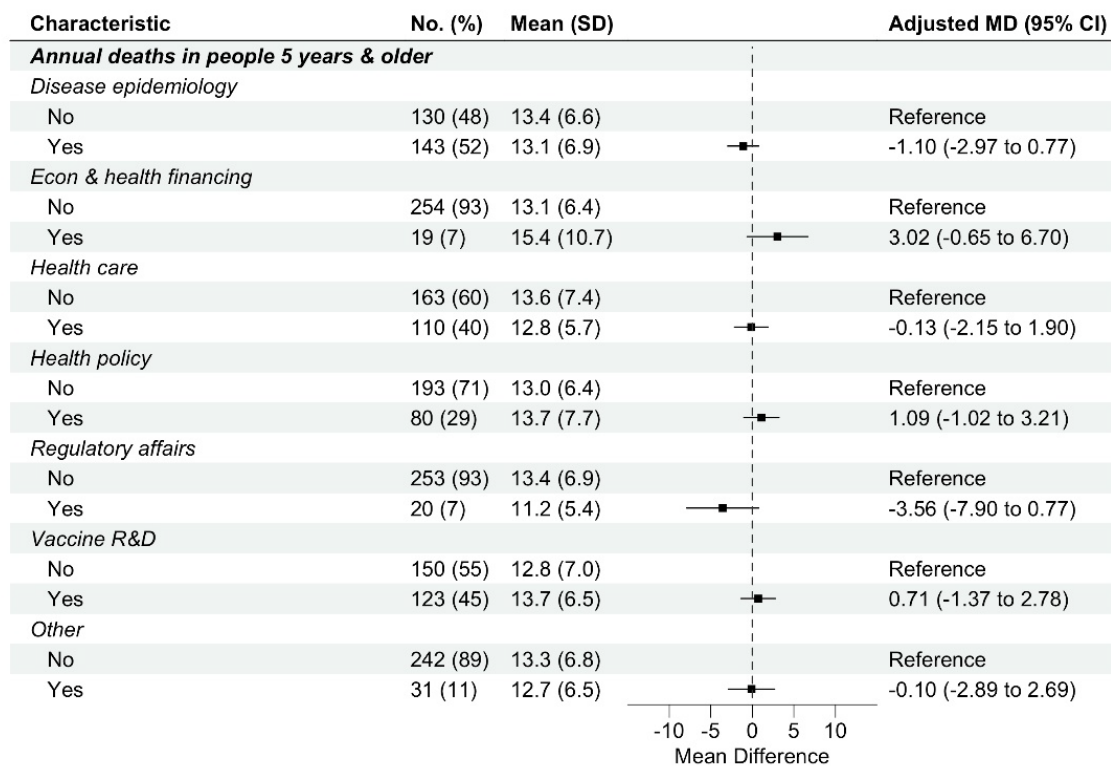

**sFigure 17 Adjusted mean difference in criteria weights by participant characteristics: Areas of expertise and Years lived with disability (n=273)**

Multivariate linear regression was used to compare mean differences in criteria weights by participant characteristics. Analysis was based on first survey submission per survey type by a participant in which all trade-off questions and post-survey were complete. Models were adjusted for years of experience, language and WHO region of survey, field of expertise, eligibility for Gavi support and World Bank group classifications for country of work, type of work organisation, and participant’s assessment regarding ease or difficulty to understand survey. Criteria weights are expressed as a percentage. Bars on plot indicate 95% confidence interval.

Abbreviations: MD, Mean Difference; CI, Confidence Interval; SD, Standard Deviation; No., Number of Participants; Econ, Economics; R&D, Research and Development

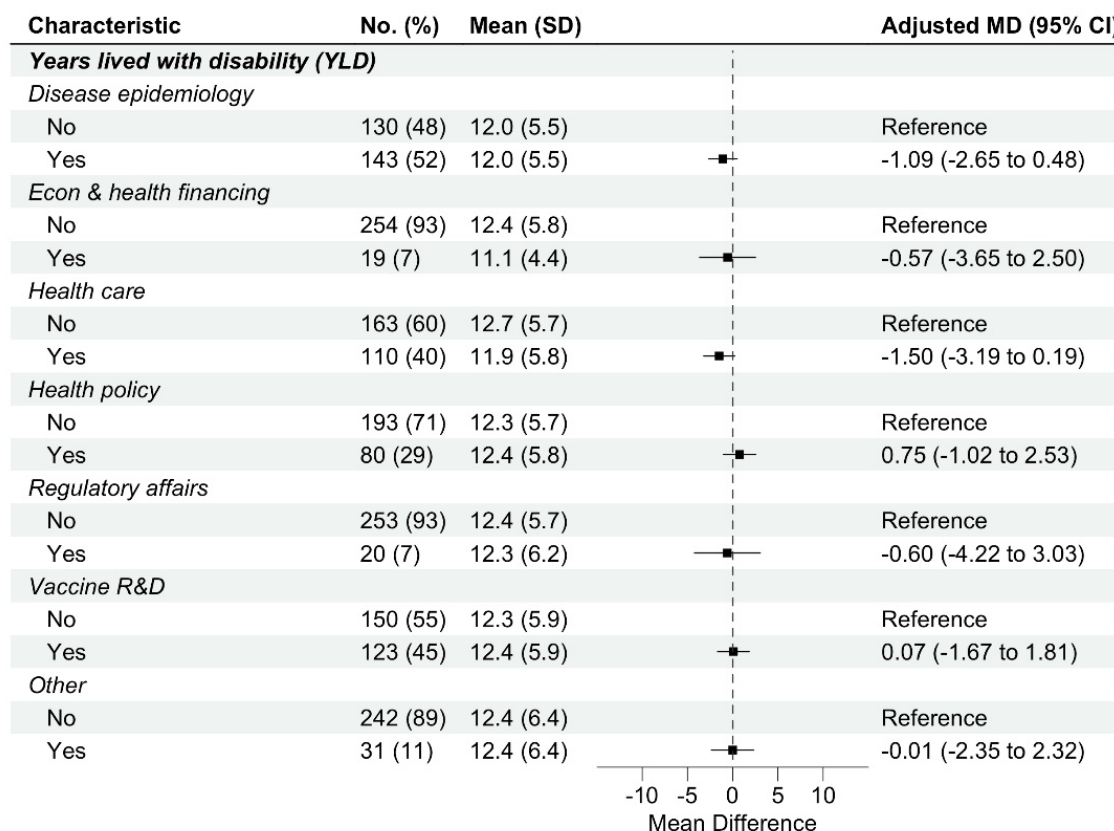



**sFigure 18 Adjusted mean difference in criteria weights by participant characteristics: Areas of expertise and Social and economic burden per case (n=273)**

Multivariate linear regression was used to compare mean differences in criteria weights by participant characteristics. Analysis was based on first survey submission per survey type by a participant in which all trade-off questions and post-survey were complete. Models were adjusted for years of experience, language and WHO region of survey, field of expertise, eligibility for Gavi support and World Bank group classifications for country of work, type of work organisation, and participant’s assessment regarding ease or difficulty to understand survey. Criteria weights are expressed as a percentage. Bars on plot indicate 95% confidence interval.

Abbreviations: MD, Mean Difference; CI, Confidence Interval; SD, Standard Deviation; No., Number of Participants; Econ, Economics; R&D, Research and Development

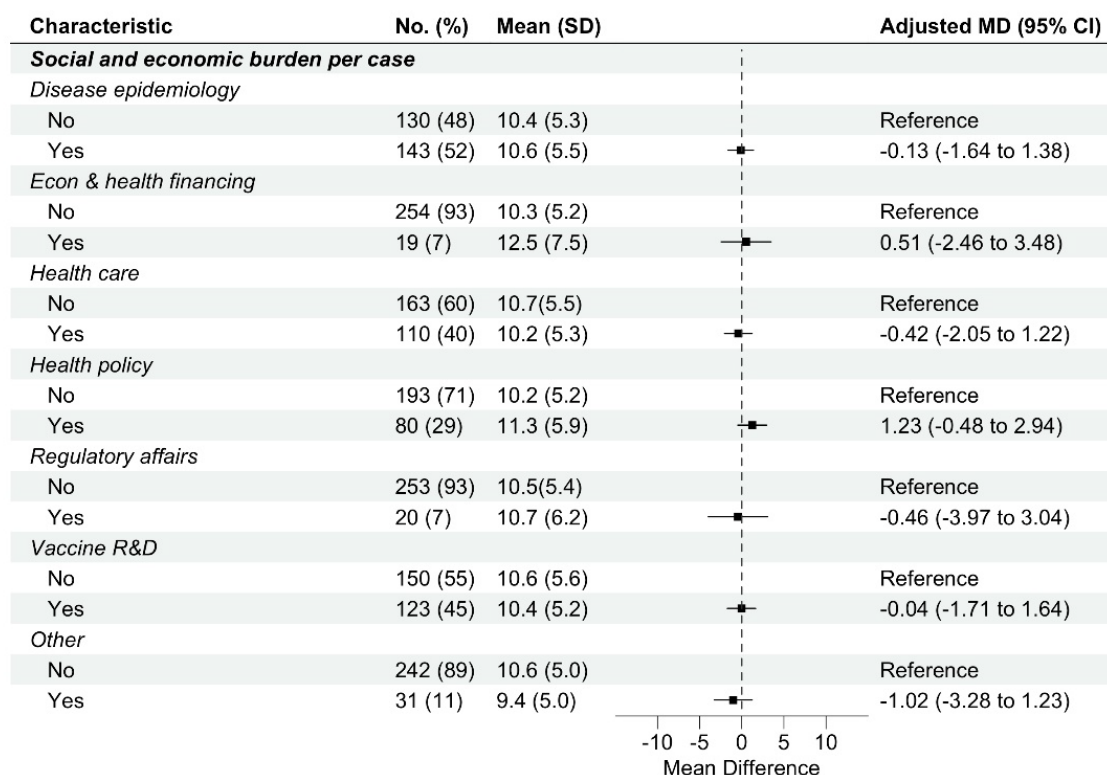

**sFigure 19 Adjusted mean difference in criteria weights by participant characteristics: Areas of expertise and Disruption due to outbreaks (n=273)**

Multivariate linear regression was used to compare mean differences in criteria weights by participant characteristics. Analysis was based on first survey submission per survey type by a participant in which all trade-off questions and post-survey were complete. Models were adjusted for years of experience, language and WHO region of survey, field of expertise, eligibility for Gavi support and World Bank group classifications for country of work, type of work organisation, and participant’s assessment regarding ease or difficulty to understand survey. Criteria weights are expressed as a percentage. Bars on plot indicate 95% confidence interval.

Abbreviations: MD, Mean Difference; CI, Confidence Interval; SD, Standard Deviation; No., Number of Participants; Econ, Economics; R&D, Research and Development

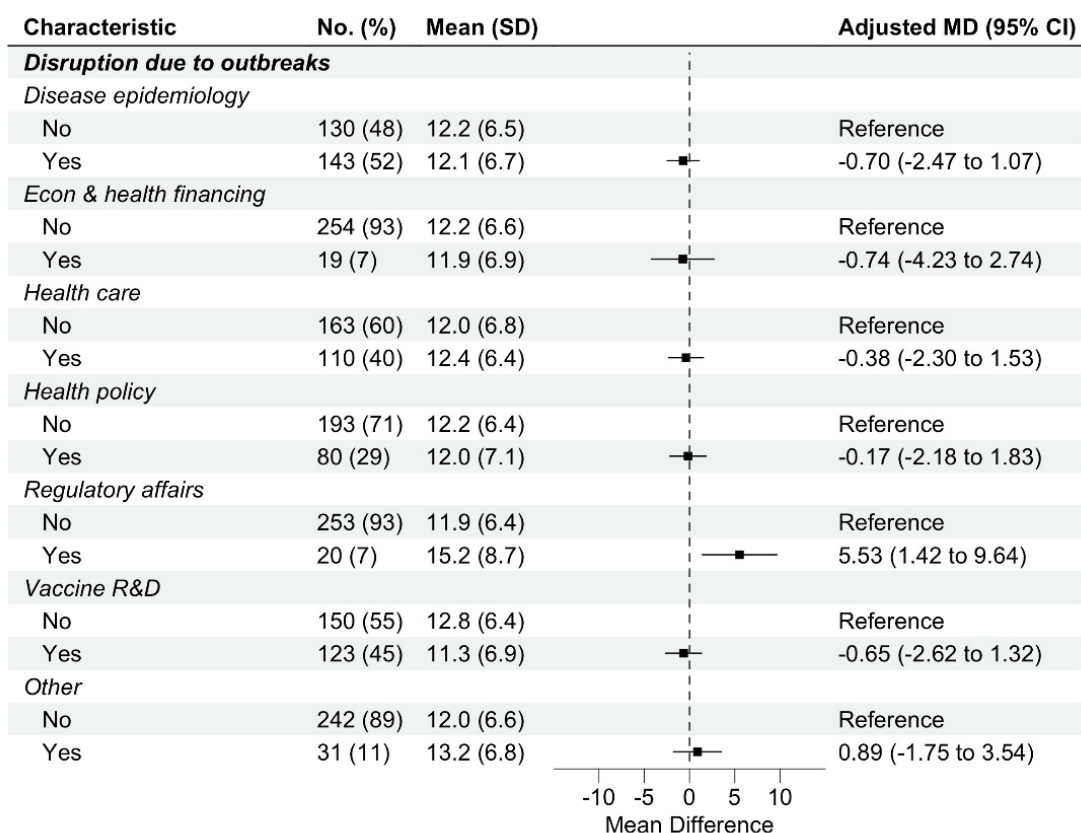



**sFigure 20 Adjusted mean difference in criteria weights by participant characteristics: Areas of expertise and Contribution to inequity (n=273)**

Multivariate linear regression was used to compare mean differences in criteria weights by participant characteristics. Analysis was based on first survey submission per survey type by a participant in which all trade-off questions and post-survey were complete. Models were adjusted for years of experience, language and WHO region of survey, field of expertise, eligibility for Gavi support and World Bank group classifications for country of work, type of work organisation, and participant’s assessment regarding ease or difficulty to understand survey. Criteria weights are expressed as a percentage. Bars on plot indicate 95% confidence interval.

Abbreviations: MD, Mean Difference; CI, Confidence Interval; SD, Standard Deviation; No., Number of Participants; Econ, Economics; R&D, Research and Development

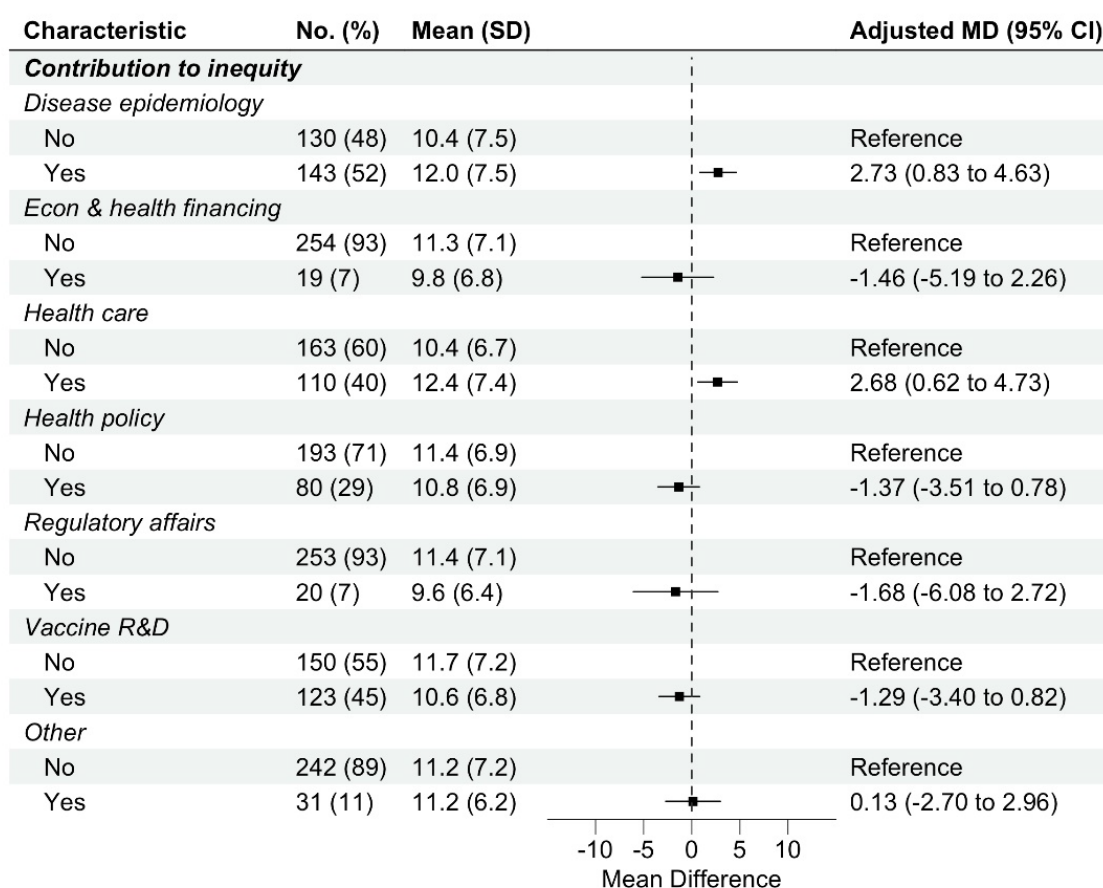

**sFigure 21 Adjusted mean difference in criteria weights by participant characteristics: Areas of expertise and Contribution to antimicrobial resistance (n=273)**

Multivariate linear regression was used to compare mean differences in criteria weights by participant characteristics. Analysis was based on first survey submission per survey type by a participant in which all trade-off questions and post-survey were complete. Models were adjusted for years of experience, language and WHO region of survey, field of expertise, eligibility for Gavi support and World Bank group classifications for country of work, type of work organisation, and participant’s assessment regarding ease or difficulty to understand survey. Criteria weights are expressed as a percentage. Bars on plot indicate 95% confidence interval.

Abbreviations: MD, Mean Difference; CI, Confidence Interval; SD, Standard Deviation; No., Number of Participants; Econ, Economics; R&D, Research and Development

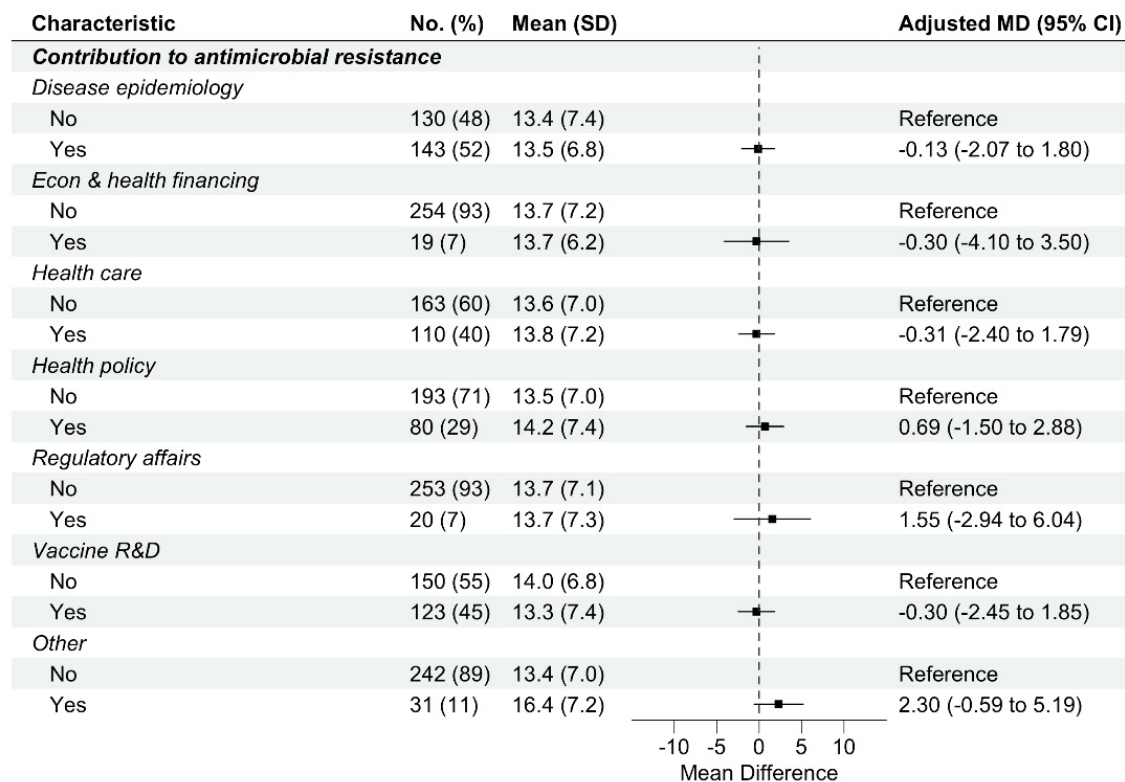

**sFigure 22 Adjusted mean difference in criteria weights by participant characteristics: Areas of expertise and Unmet needs for prevention and treatment (n=273)**

Multivariate linear regression was used to compare mean differences in criteria weights by participant characteristics. Analysis was based on first survey submission per survey type by a participant in which all trade-off questions and post-survey were complete. Models were adjusted for years of experience, language and WHO region of survey, field of expertise, eligibility for Gavi support and World Bank group classifications for country of work, type of work organisation, and participant’s assessment regarding ease or difficulty to understand survey. Criteria weights are expressed as a percentage. Bars on plot indicate 95% confidence interval.

Abbreviations: MD, Mean Difference; CI, Confidence Interval; SD, Standard Deviation; No., Number of Participants; Econ, Economics; R&D, Research and Development

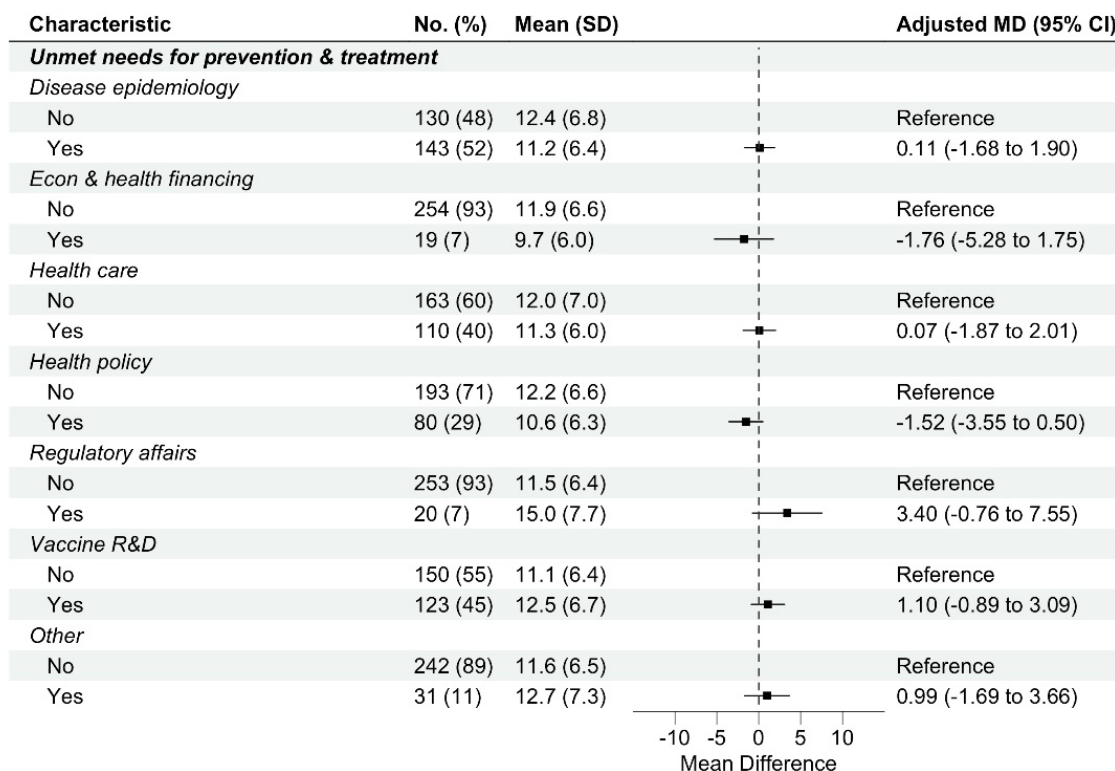

**sFigure 23 Adjusted mean difference in criteria weights by participant characteristics: Type of work organisation and Annual deaths in children under 5 years (n=273)**

Multivariate linear regression was used to compare mean differences in criteria weights by participant characteristics. Analysis was based on first survey submission per survey type by a participant in which all trade-off questions and post-survey were complete. Models were adjusted for years of experience, language and WHO region of survey, field of expertise, eligibility for Gavi support and World Bank group classifications for country of work, type of work organisation, and participant's assessment regarding ease or difficulty to understand survey. Criteria weights are expressed as a percentage. Bars on plot indicate 95% confidence interval.

Abbreviations: MD, Mean Difference; CI, Confidence Interval; SD, Standard Deviation; No., Number of Participants; NGO, Non-Governmental Organization

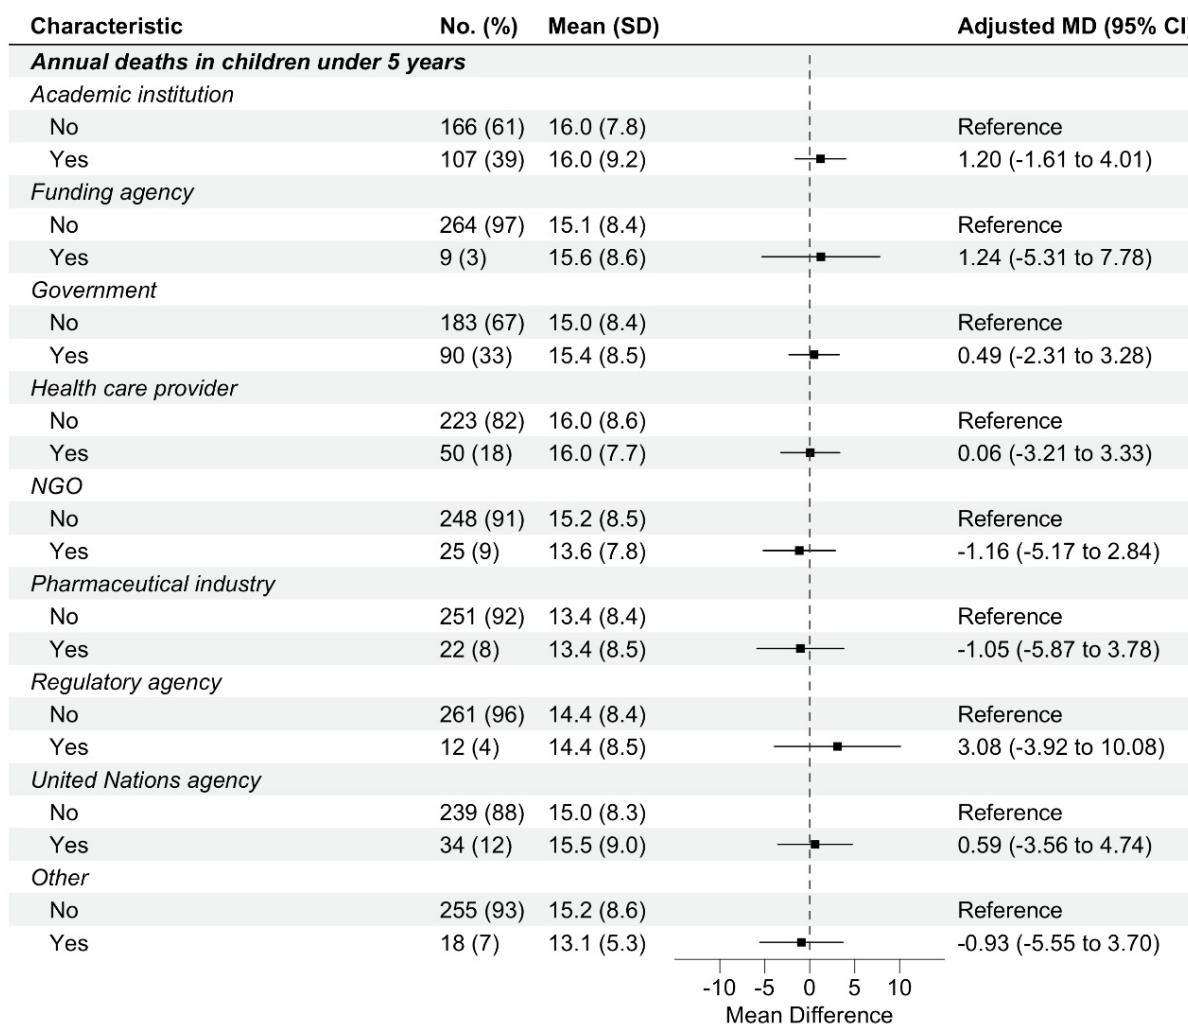

sFigure 24 Adjusted mean difference in criteria weights by participant characteristics: Type of work organisation and Annual deaths in people 5 years and older (n=273)

Multivariate linear regression was used to compare mean differences in criteria weights by participant characteristics. Analysis was based on first survey submission per survey type by a participant in which all trade-off questions and post-survey were complete. Models were adjusted for years of experience, language and WHO region of survey, field of expertise, eligibility for Gavi support and World Bank group classifications for country of work, type of work organisation, and participant’s assessment regarding ease or difficulty to understand survey. Criteria weights are expressed as a percentage. Bars on plot indicate 95% confidence interval.

Abbreviations: MD, Mean Difference; CI, Confidence Interval; SD, Standard Deviation; No., Number of Participants; NGO, Non-Governmental Organization

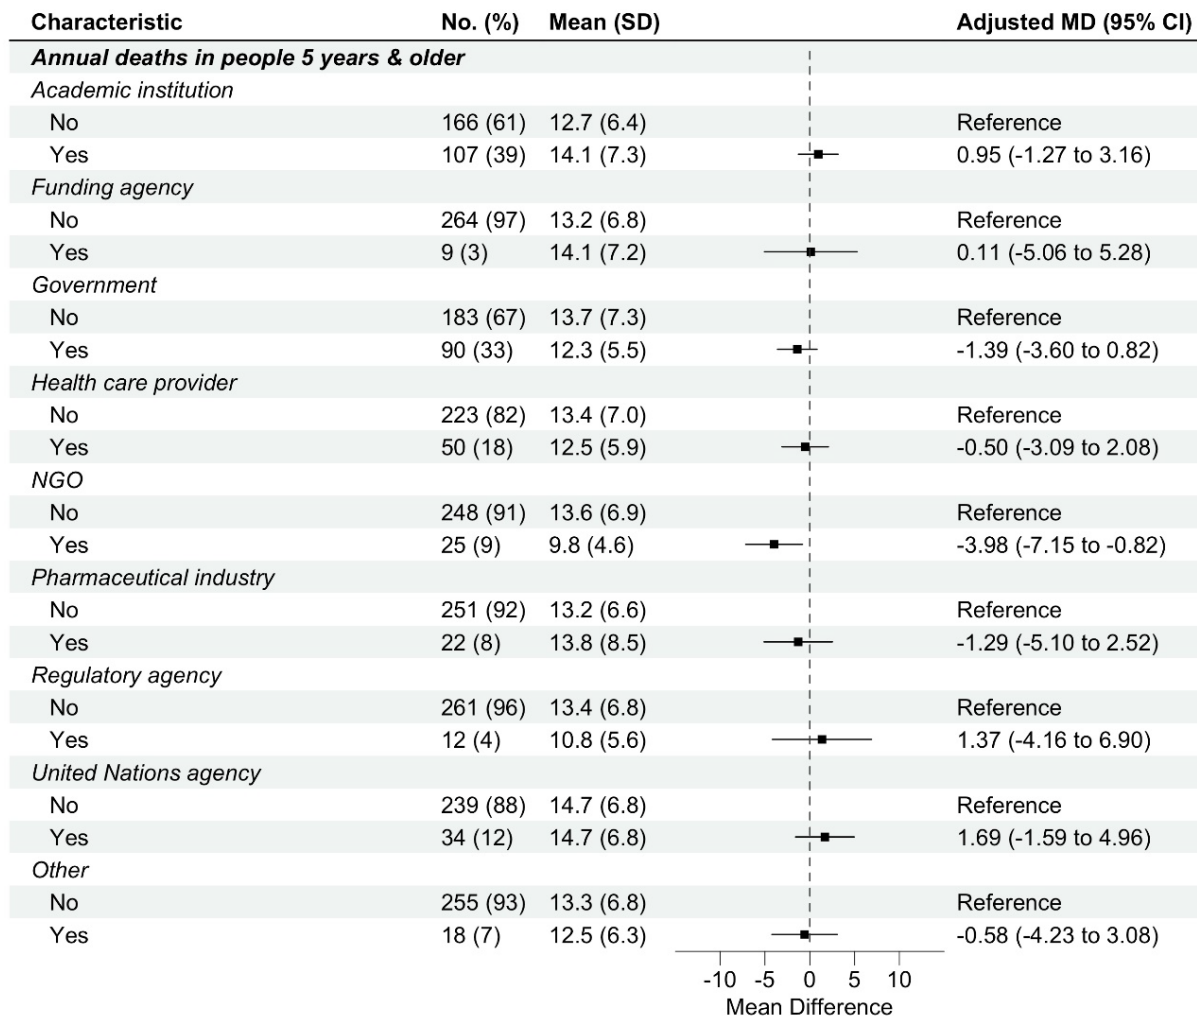

**sFigure 25 Adjusted mean difference in criteria weights by participant characteristics: Type of work organisation and Years lived with disability (n=273)**

Multivariate linear regression was used to compare mean differences in criteria weights by participant characteristics. Analysis was based on first survey submission per survey type by a participant in which all trade-off questions and post-survey were complete. Models were adjusted for years of experience, language and WHO region of survey, field of expertise, eligibility for Gavi support and World Bank group classifications for country of work, type of work organisation, and participant's assessment regarding ease or difficulty to understand survey. Criteria weights are expressed as a percentage. Bars on plot indicate 95% confidence interval.

Abbreviations: MD, Mean Difference; CI, Confidence Interval; SD, Standard Deviation; No., Number of Participants; NGO, Non-Governmental Organization

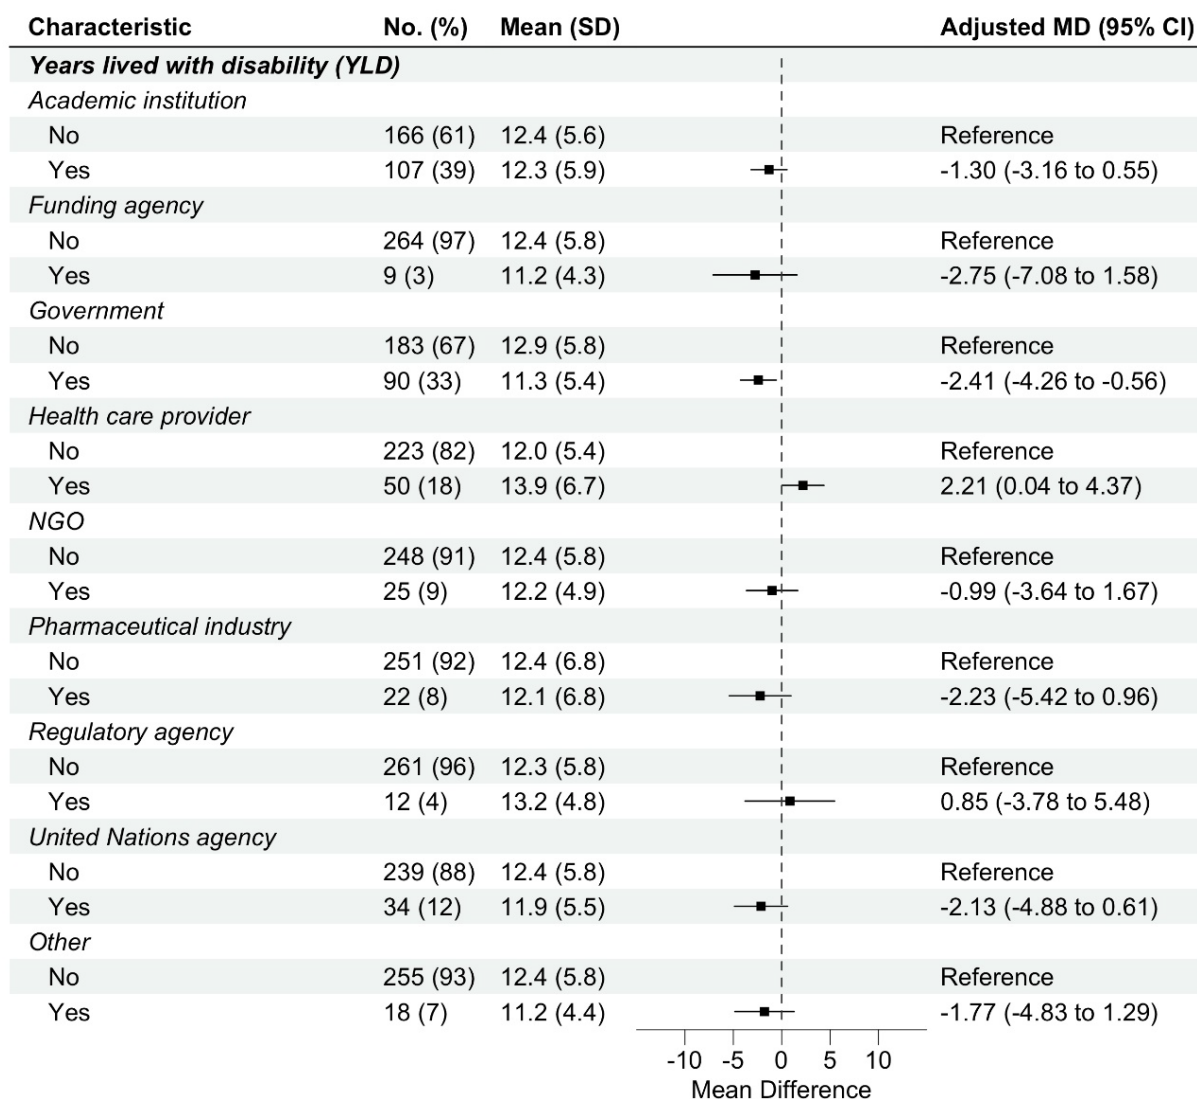

**sFigure 26 Adjusted mean difference in criteria weights by participant characteristics: Type of work organisation and Social and economic burden per case (n=273)**

Multivariate linear regression was used to compare mean differences in criteria weights by participant characteristics. Analysis was based on first survey submission per survey type by a participant in which all trade-off questions and post-survey were complete. Models were adjusted for years of experience, language and WHO region of survey, field of expertise, eligibility for Gavi support and World Bank group classifications for country of work, type of work organisation, and participant’s assessment regarding ease or difficulty to understand survey. Criteria weights are expressed as a percentage. Bars on plot indicate 95% confidence interval.

Abbreviations: MD, Mean Difference; CI, Confidence Interval; SD, Standard Deviation; No., Number of Participants; NGO, Non-Governmental Organization

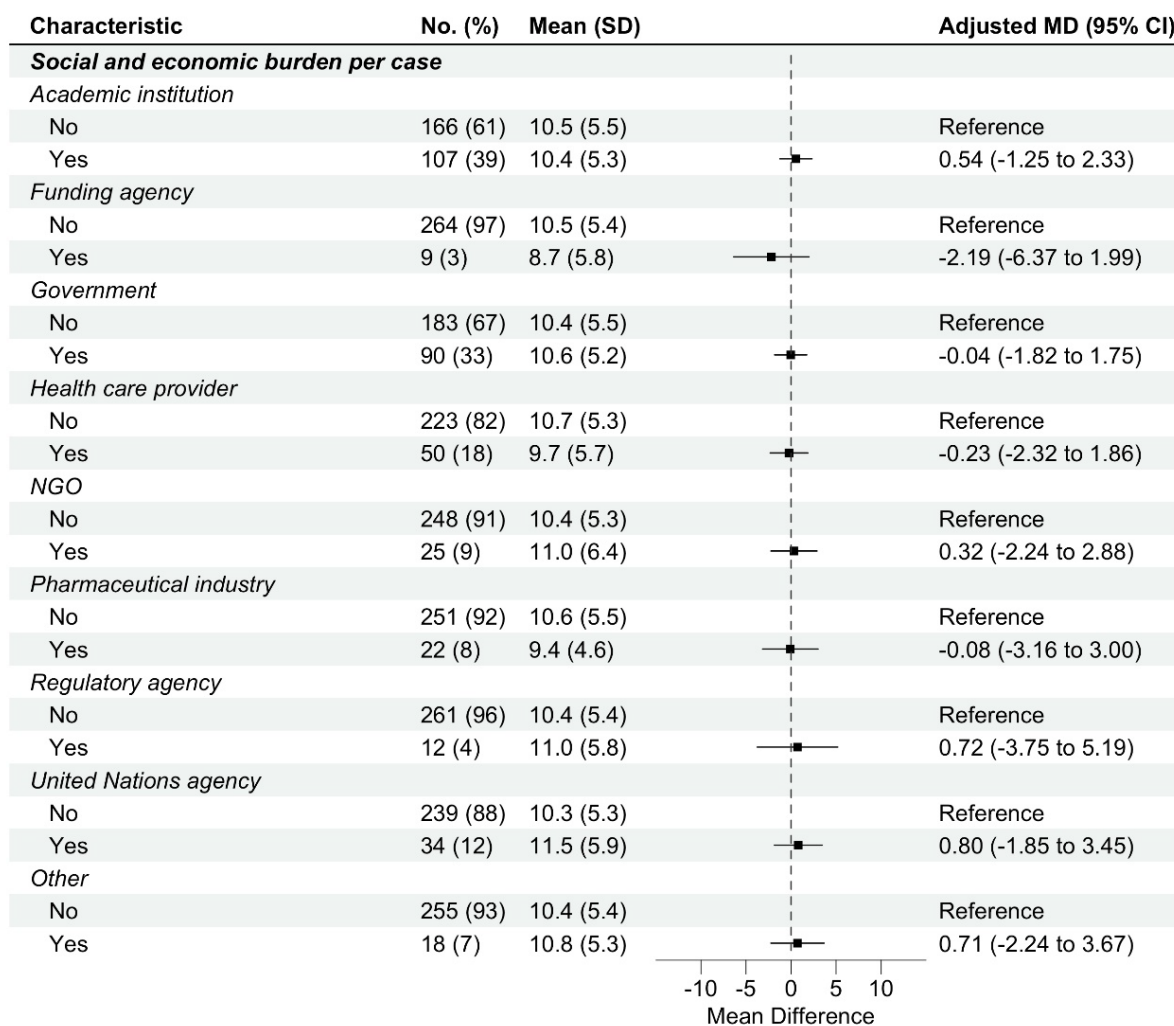



**sFigure 27 Adjusted mean difference in criteria weights by participant characteristics: Type of work organisation and Disruption due to outbreaks (n=273)**

Multivariate linear regression was used to compare mean differences in criteria weights by participant characteristics. Analysis was based on first survey submission per survey type by a participant in which all trade-off questions and post-survey were complete. Models were adjusted for years of experience, language and WHO region of survey, field of expertise, eligibility for Gavi support and World Bank group classifications for country of work, type of work organisation, and participant's assessment regarding ease or difficulty to understand survey. Criteria weights are expressed as a percentage. Bars on plot indicate 95% confidence interval.

Abbreviations: MD, Mean Difference; CI, Confidence Interval; SD, Standard Deviation; No., Number of Participants; NGO, Non-Governmental Organization

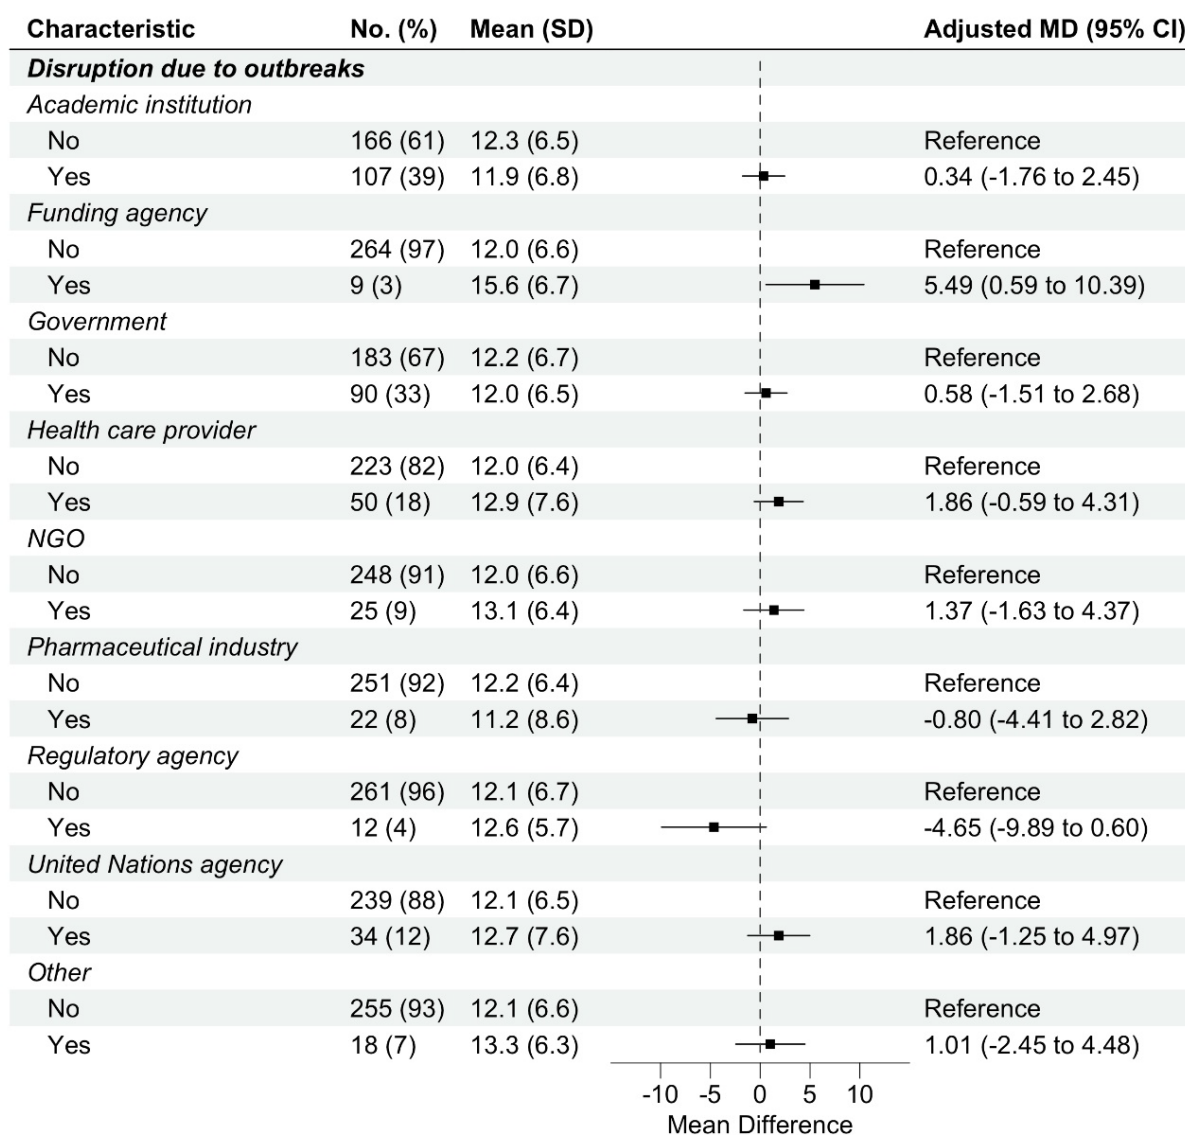



**sFigure 28 Adjusted mean difference in criteria weights by participant characteristics: Type of work organisation and Contribution to inequity (n=273)**

Multivariate linear regression was used to compare mean differences in criteria weights by participant characteristics. Analysis was based on first survey submission per survey type by a participant in which all trade-off questions and post-survey were complete. Models were adjusted for years of experience, language and WHO region of survey, field of expertise, eligibility for Gavi support and World Bank group classifications for country of work, type of work organisation, and participant’s assessment regarding ease or difficulty to understand survey. Criteria weights are expressed as a percentage. Bars on plot indicate 95% confidence interval.

Abbreviations: MD, Mean Difference; CI, Confidence Interval; SD, Standard Deviation; No., Number of Participants; NGO, Non-Governmental Organization

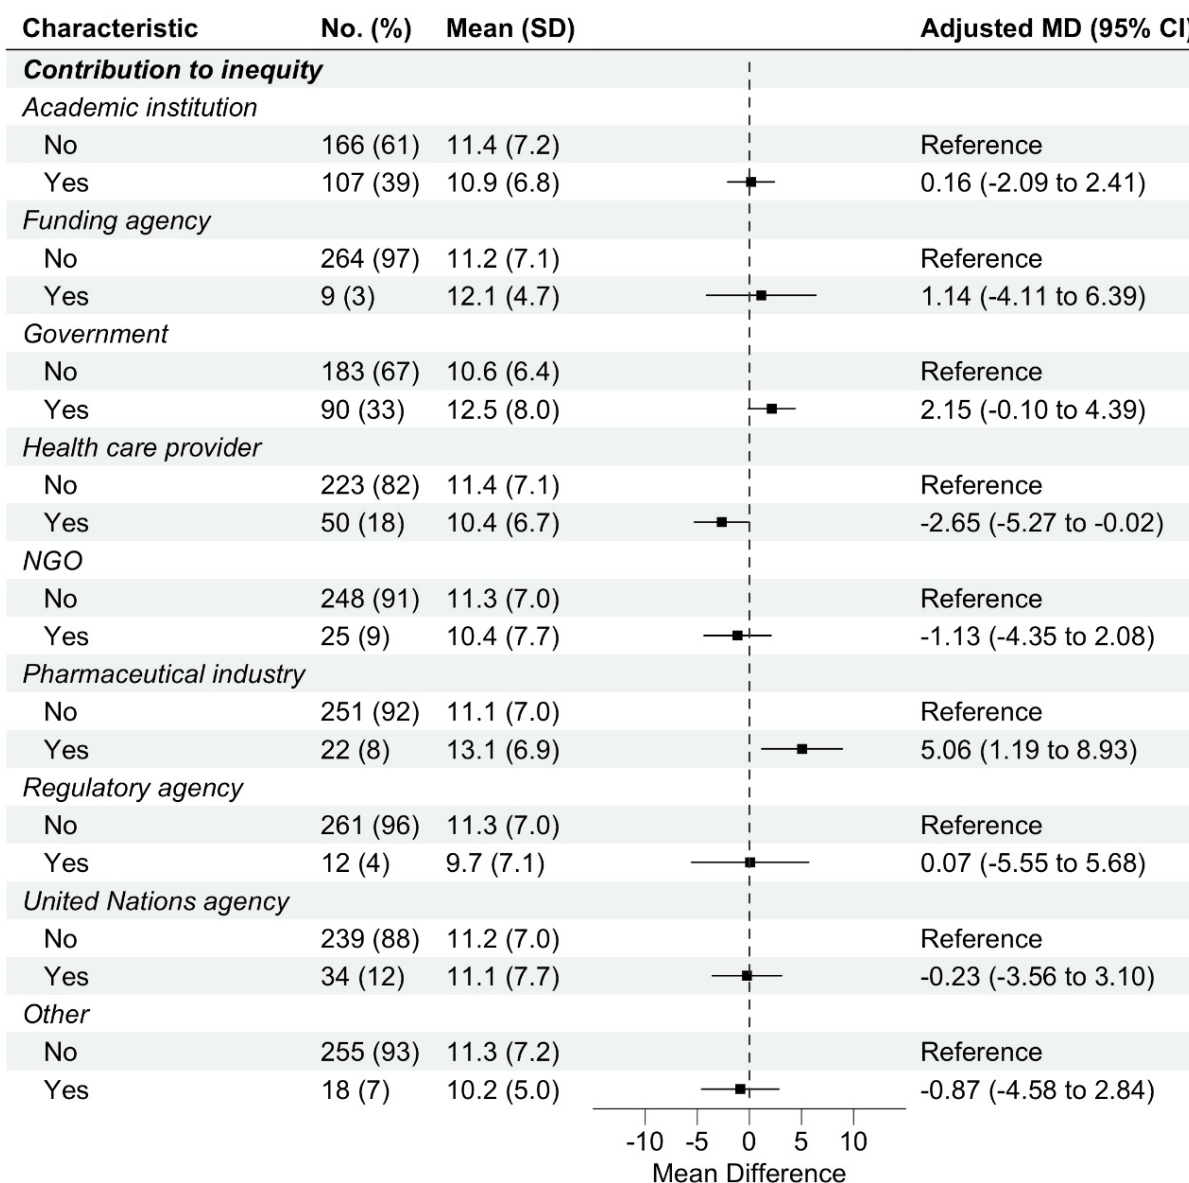

**sFigure 29 Adjusted mean difference in criteria weights by participant characteristics: Type of work organisation and Contribution to antimicrobial resistance (n=273)**

Multivariate linear regression was used to compare mean differences in criteria weights by participant characteristics. Analysis was based on first survey submission per survey type by a participant in which all trade-off questions and post-survey were complete. Models were adjusted for years of experience, language and WHO region of survey, field of expertise, eligibility for Gavi support and World Bank group classifications for country of work, type of work organisation, and participant's assessment regarding ease or difficulty to understand survey. Criteria weights are expressed as a percentage. Bars on plot indicate 95% confidence interval.

Abbreviations: MD, Mean Difference; CI, Confidence Interval; SD, Standard Deviation; No., Number of Participants; NGO, Non-Governmental Organization

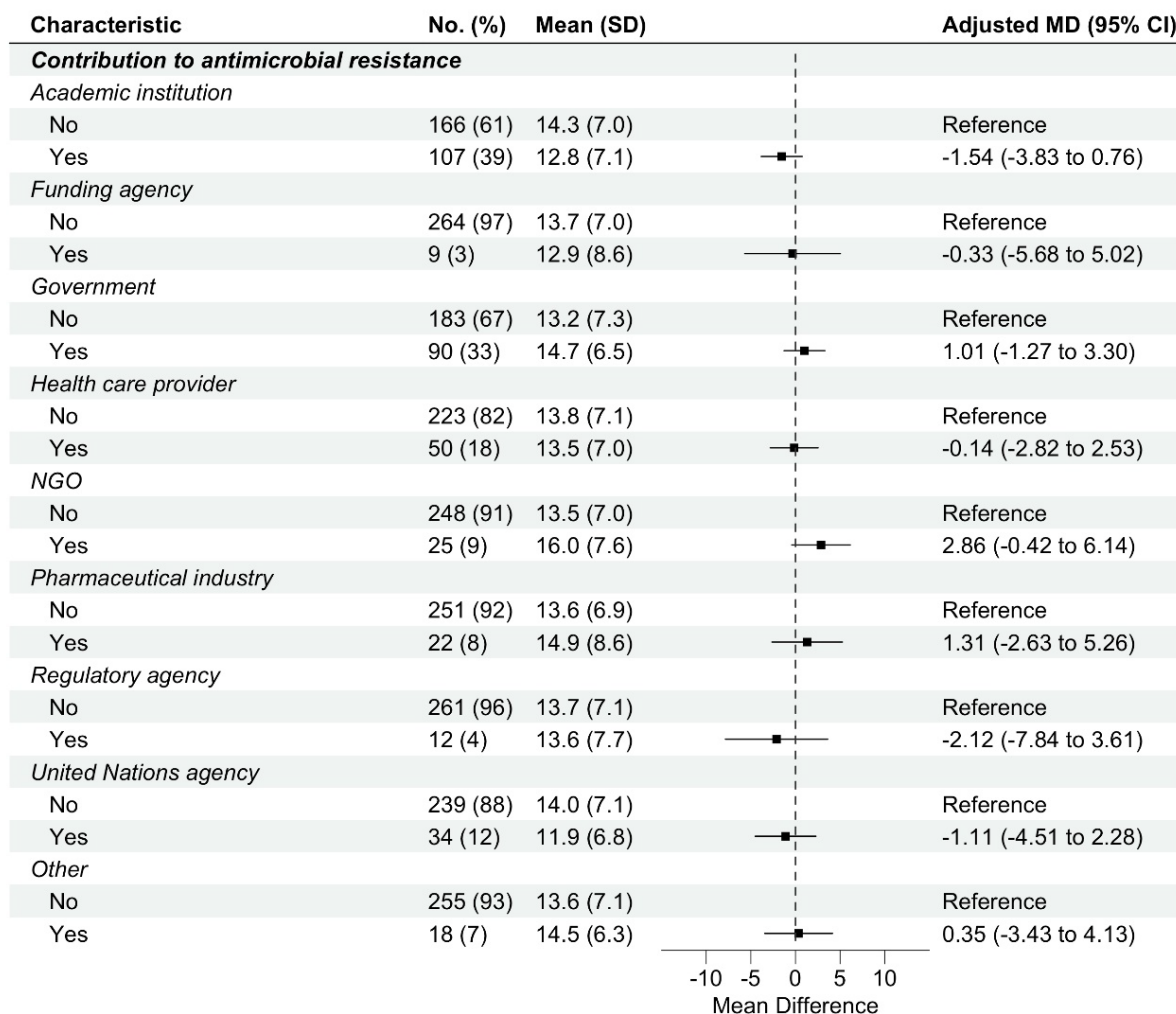

**sFigure 30 Adjusted mean difference in criteria weights by participant characteristics: Type of work organisation and Unmet needs for prevention and treatment (n=273)**

Multivariate linear regression was used to compare mean differences in criteria weights by participant characteristics. Analysis was based on first survey submission per survey type by a participant in which all trade-off questions and post-survey were complete. Models were adjusted for years of experience, language and WHO region of survey, field of expertise, eligibility for Gavi support and World Bank group classifications for country of work, type of work organisation, and participant’s assessment regarding ease or difficulty to understand survey. Criteria weights are expressed as a percentage. Bars on plot indicate 95% confidence interval.

Abbreviations: MD, Mean Difference; CI, Confidence Interval; SD, Standard Deviation; No., Number of Participants; NGO, Non-Governmental Organization

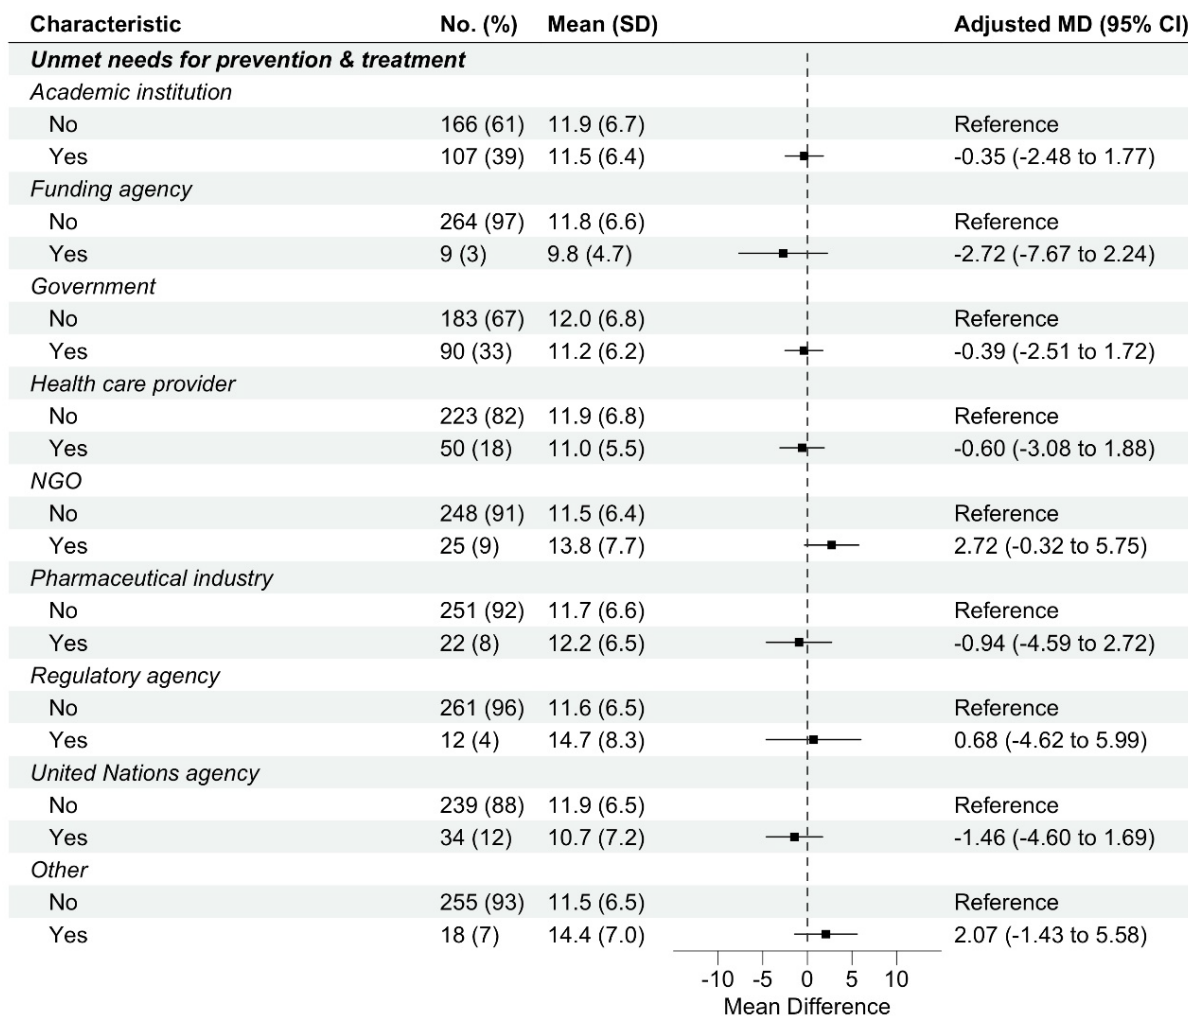

**sFigure 31 Adjusted mean difference in criteria weights by participant characteristics: Gavi eligibility of participants' country of work (n=273)**

Multivariate linear regression was used to compare mean differences in criteria weights by participant characteristics. Analysis was based on first survey submission per survey type by a participant in which all trade-off questions and post-survey were complete. Models were adjusted for years of experience, language and WHO region of survey, field of expertise, eligibility for Gavi support and World Bank group classifications for country of work, type of work organisation, and participant's assessment regarding ease or difficulty to understand survey. Criteria weights are expressed as a percentage. Bars on plot indicate 95% confidence interval.

Abbreviations: MD, Mean Difference; CI, Confidence Interval; SD, Standard Deviation; No., Number of Participants

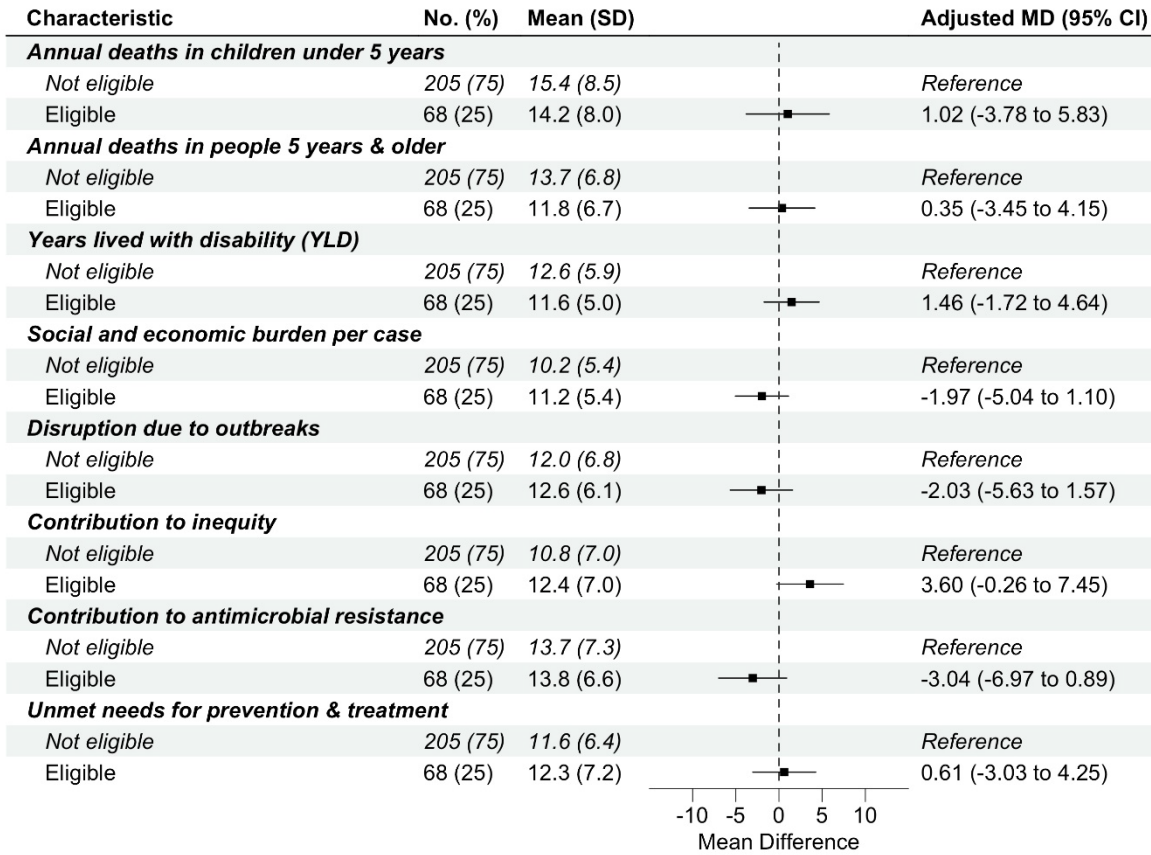

**sFigure 32 Adjusted mean difference in criteria weights by participant characteristics: World Bank classification of participants' country of work (n=273)**

Multivariate linear regression was used to compare mean differences in criteria weights by participant characteristics. Analysis was based on first survey submission per survey type by a participant in which all trade-off questions and post-survey were complete. Models were adjusted for years of experience, language and WHO region of survey, field of expertise, eligibility for Gavi support and World Bank group classifications for country of work, type of work organisation, and participant's assessment regarding ease or difficulty to understand survey. Criteria weights are expressed as a percentage. Bars on plot indicate 95% confidence interval.

Abbreviations: MD, Mean Difference; CI, Confidence Interval; SD, Standard Deviation; No., Number of Participants

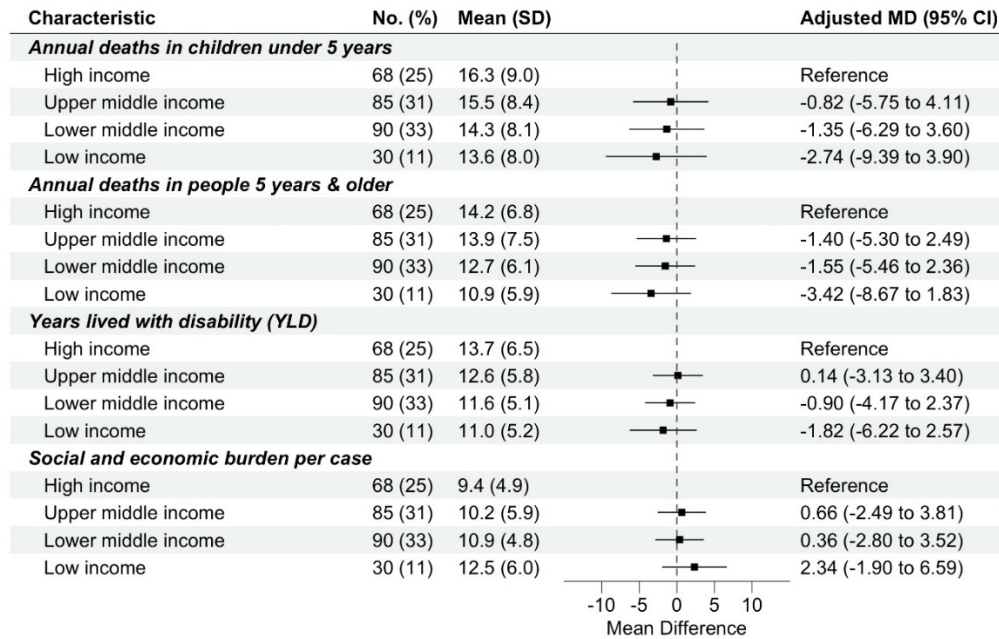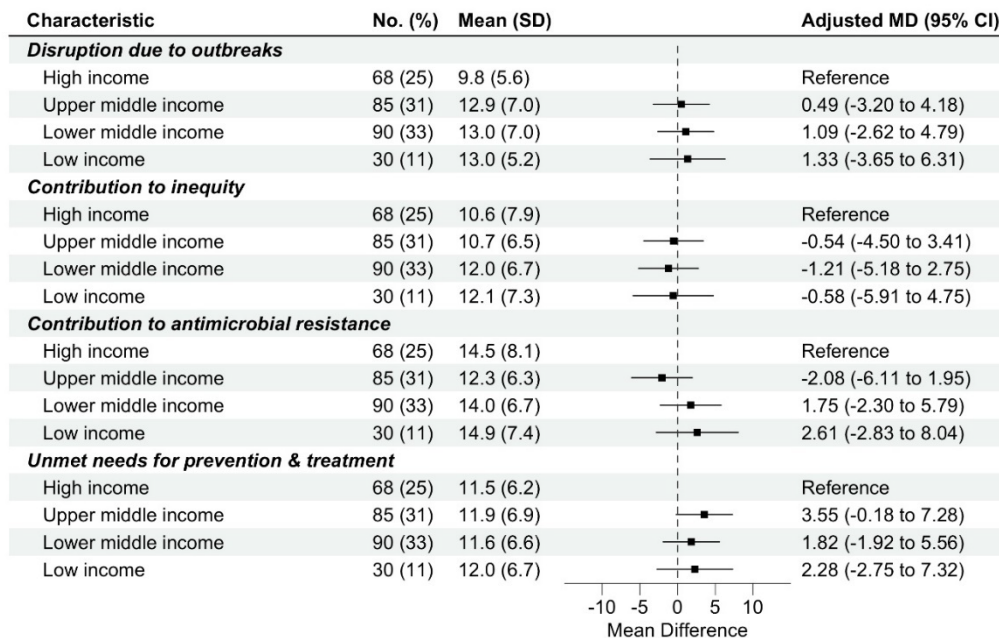

*Characterising group patterns in criteria weights*

**sFigure 33** Criteria weights by cluster (2-cluster model) (n=273)

Error bars show 95% confidence interval.

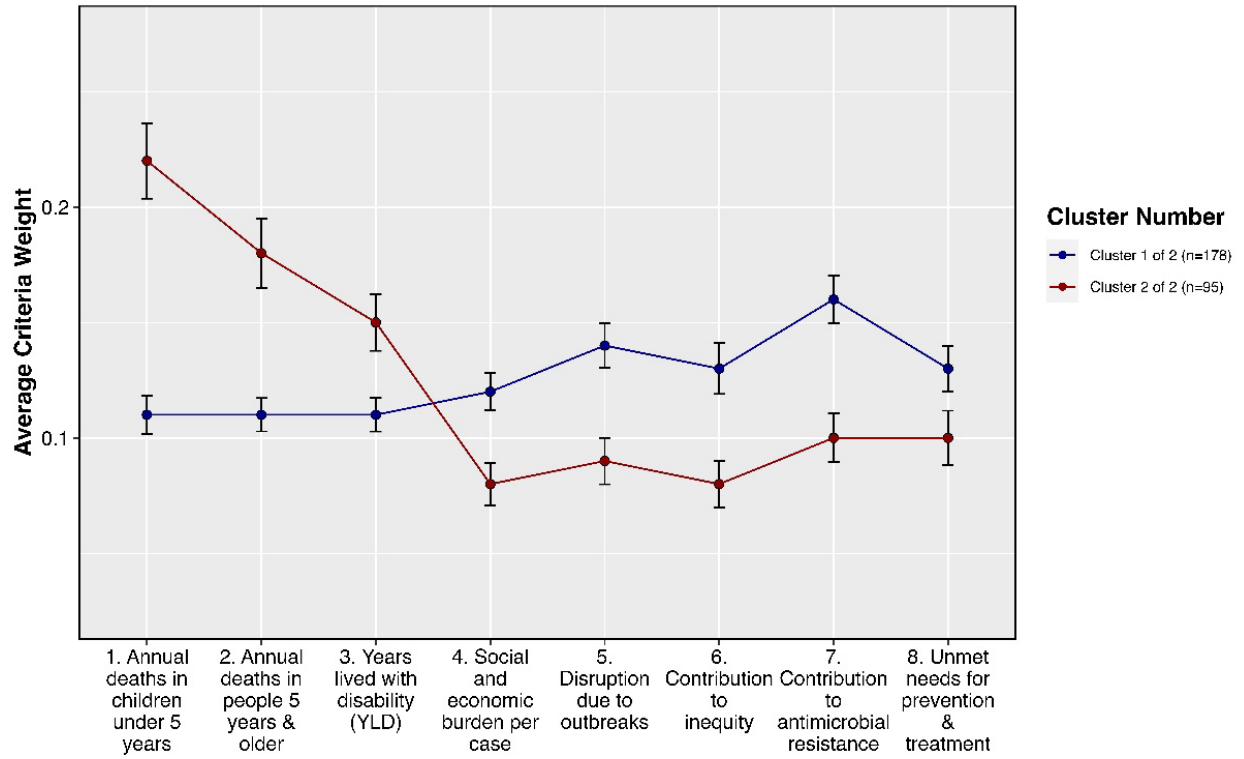



*Assessing whether groups of respondents sharing similar patterns in criteria weights also shared similar biographical backgrounds or impressions of the survey*

**sFigure 34 Participant Factors associated with cluster membership, Years of experience and Areas of expertise**

A generalized linear model was used to compare odds of membership in a specific cluster by participant characteristics. Cluster #1 and Cluster #2 columns represent number of subjects (%). Models were adjusted for years of experience, language and WHO region of survey, field of expertise, eligibility for Gavi support and World Bank group classifications for country of work, type of work organisation, and participant’s assessment regarding ease or difficulty to understand survey. Bars on plot indicate 95% confidence interval.

Abbreviations: OR, Odds Ratio; CI, Confidence Interval

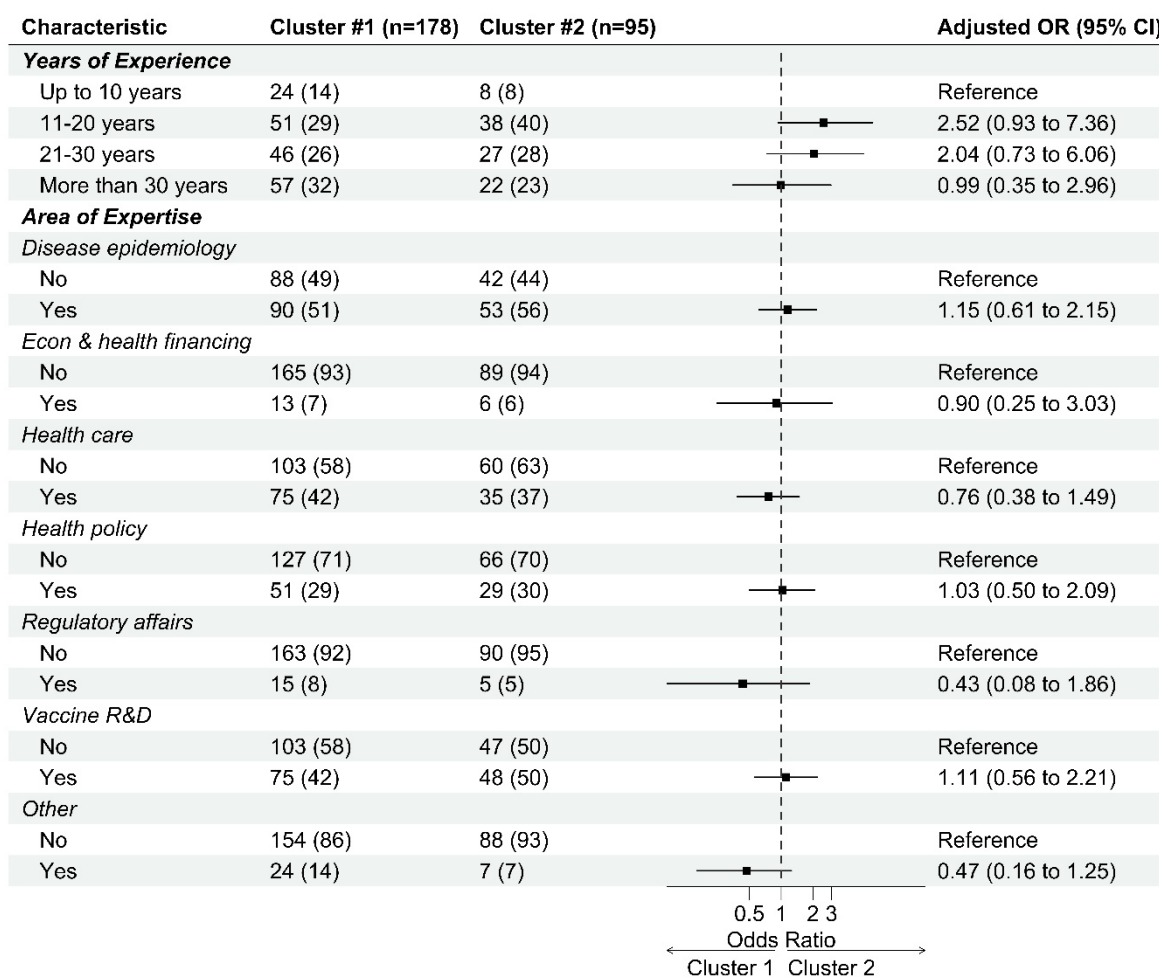

**sFigure 35 Participant Factors associated with cluster membership, Type of work organization and Country of work**

A generalized linear model was used to compare odds of membership in a specific cluster by participant characteristics. Cluster #1 and Cluster #2 columns represent number of subjects (%). Models were adjusted for years of experience, language and WHO region of survey, field of expertise, eligibility for Gavi support and World Bank group classifications for country of work, type of work organisation, and participant's assessment regarding ease or difficulty to understand survey. Bars on plot indicate 95% confidence interval.

Abbreviations: OR, Odds Ratio; CI, Confidence Interval; NGO, Non-Governmental Organization

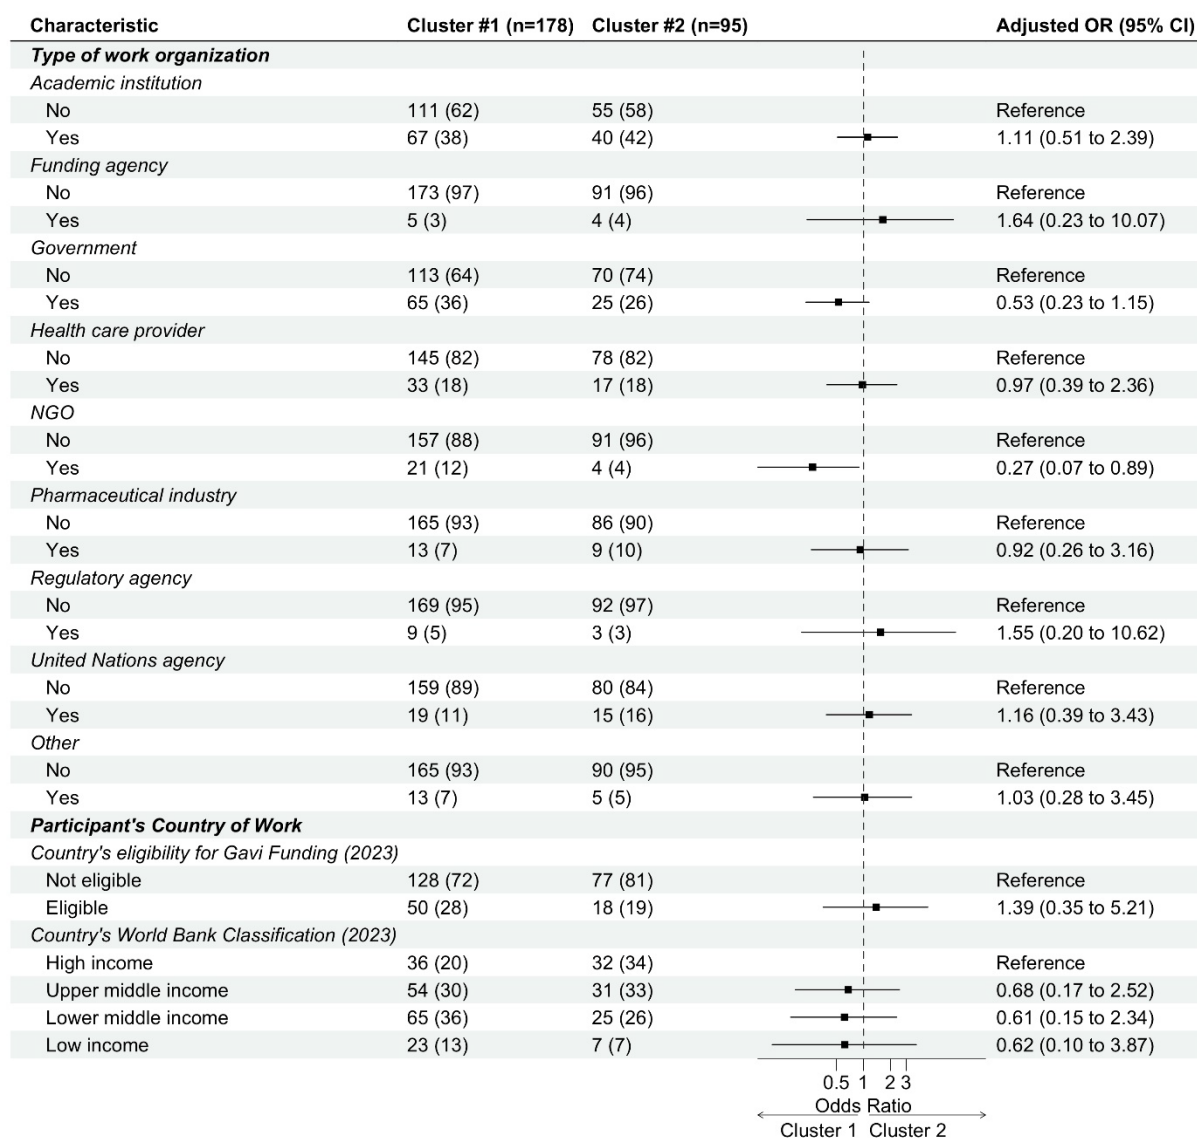



## References

1. Boppana SB, van Boven M, Britt WJ, Gantt S, Griffiths PD, Grosse SD, et al. Vaccine value profile for cytomegalovirus. *Vaccine*. 2023 Nov;41 Suppl 2:S53–75.
2. World Health Organization. Dengue vaccines: WHO position paper – September 2018. *Wkly Epidemiol Rec* [Internet]. 2018;36(93):457–76. Available from: <https://www.who.int/publications/i/item/who-wer9335-457-476>
3. Wellcome Trust. Vaccines to tackle drug resistant infections An evaluation of R&D opportunities [Internet]. 2018 [cited 2024 June 20]. Available from: [https://vaccinesforamr.org/wp-content/uploads/2018/09/Vaccines\\_for\\_AMR.pdf](https://vaccinesforamr.org/wp-content/uploads/2018/09/Vaccines_for_AMR.pdf)
4. World Health Organization. WHO Preferred Product Characteristics for Group A Streptococcus Vaccines [Internet]. 2018 [cited 2024 June 20]. Available from: <https://www.who.int/publications-detail-redirect/who-preferred-product-characteristics-for-group-a-streptococcus-vaccines>
5. World Health Organization. WHO Preferred Product Characteristics for Group B Streptococcus Vaccines [Internet]. 2017 [cited 2024 June 20]. Available from: <https://apps.who.int/iris/rest/bitstreams/1087677/retrieve>
6. Minervax ApS. Study to Evaluate the Safety, Tolerability and Immunogenicity of Three Doses of GBS Vaccine in Elderly Participants: NCT05782179 [Internet]. 2023 [cited 2024 June 20]. Available from: <https://classic.clinicaltrials.gov/ct2/show/NCT05782179>
7. Phelps CC, Walker CM, Honegger JR. Where to Next? Research Directions after the First Hepatitis C Vaccine Efficacy Trial. *Viruses*. 2021 Jul;13(7):1351.
8. Pevion Biotech Ltd. GeneCure Biotechnologies. A Phase I Trial of an Immunotherapy (HCVax™) in Chronic Hepatitis C Infected Patients: NCT00445419 [Internet]. 2007 [cited 2024 June 20]. Available from: <https://classic.clinicaltrials.gov/ct2/show/NCT00445419>
9. World Health Organization. WHO preferred product characteristics for monoclonal antibodies for HIV prevention [Internet]. 2022 [cited 2024 June 20]. Available from: <https://www.who.int/publications/i/item/9789240045729>
10. World Health Organization. WHO Preferred Product Characteristics for Next-Generation Influenza Vaccines [Internet]. 2017 [cited 2024 June 20]. Available from: <https://www.who.int/publications/i/item/9789241512466>
11. Kumar CK, Sands K, Walsh TR, O'Brien S, Sharland M, Lewnard JA, et al. Global, regional, and national estimates of the impact of a maternal *Klebsiella pneumoniae* vaccine: A Bayesian modeling analysis. *PLoS Med*. 2023 May;20(5):e1004239.
12. Dangor Z, Benson N, Berkley JA, Bielicki J, Bijnsma MW, Broad J, et al. Vaccine value profile for *Klebsiella pneumoniae*. *Vaccine*. 2024 Jul;42(19S1):S125-S141.
13. Wantuch PL, Rosen DA. *Klebsiella pneumoniae*: adaptive immune landscapes and vaccine horizons. *Trends Immunol*. 2023 Oct;44(10):826–44.
14. Kaye PM, Matlashewski G, Mohan S, Le Rutte E, Mondal D, Khamesipour A, et al.

- Vaccine value profile for leishmaniasis. *Vaccine*. 2023 Nov;41:S153–75.
15. Schragger LK, Chandrasekaran P, Fritzell BH, Hatherill M, Lambert PH, McShane H, et al. WHO preferred product characteristics for new vaccines against tuberculosis. *The Lancet Infectious Diseases*. 2018 Aug;18(8):828–9.
  16. World Health Organization. Preferred Product Characteristics for Therapeutic Vaccines to Improve Tuberculosis Treatment Outcomes [Internet]. 2019 [cited 2024 June 20]. Available from: <https://www.who.int/publications/i/item/WHO-IVB-19-05>
  17. World Health Organization. PDVAC (virtual) meeting on invasive non-typhoidal *Salmonella* (iNTS) vaccines: Summary and outcomes from PDVAC closed discussion [Internet]. 2022 [cited 2024 June 20]. Available from: [https://cdn.who.int/media/docs/default-source/immunization/pdvac/pdvac-2022/final-summary-outcomes-pdvac-closed-discussion-feb-2022.pdf?sfvrsn=f62d9b5d\\_5](https://cdn.who.int/media/docs/default-source/immunization/pdvac/pdvac-2022/final-summary-outcomes-pdvac-closed-discussion-feb-2022.pdf?sfvrsn=f62d9b5d_5)
  18. Armah G, Lopman BA, Vinjé J, O’Ryan M, Lanata CF, Groome M, et al. Vaccine value profile for norovirus. *Vaccine*. 2023 Nov;41:S134–52.
  19. World Health Organization. Malaria vaccines: preferred product characteristics and clinical development considerations. [Internet]. 2022 [cited 2024 June 20]. Available from: <https://www.who.int/publications/i/item/9789240057463>
  20. World Health Organization. WHO Preferred Product Characteristics for Respiratory Syncytial Virus (RSV) Vaccines [Internet]. 2017 [cited 2024 June 20]. Available from: <https://apps.who.int/iris/bitstream/handle/10665/258705/WHO-IVB-17.11-eng.pdf?sequence=1>
  21. World Health Organization. WHO preferred product characteristics of monoclonal antibodies for passive immunization against respiratory syncytial virus (RSV) disease [Internet]. 2021 [cited 2024 June 20]. Available from: <https://www.who.int/publications/i/item/9789240021853>
  22. World Health Organization. WHO Preferred Product Characteristics for Vaccines against *Shigella* [Internet]. 2020 [cited 2024 June 20]. Available from: <https://www.who.int/publications/i/item/9789240036741>
  23. Hausdorff WP, Anderson JD 4th, Bagamian KH, Bourgeois AL, Mills M, Sawe F, et al. Vaccine value profile for *Shigella*. *Vaccine*. 2023 Nov;41 Suppl 2:S76–94.
  24. World Health Organization. 2021 Bacterial vaccines in clinical and preclinical development: an overview and analysis. [Internet]. 2022 [cited 2024 June 20]. Available from: <https://www.who.int/publications/i/item/9789240052451>
  25. AridisPharma. Aridis Pharmaceuticals Announces Third Quarter 2023 Financial Results and Business Update [Internet]. 2023 [cited 2024 Apr 22]. Available from: <https://www.biospace.com/article/releases/aridis-pharmaceuticals-announces-third-quarter-2023-financial-results-and-business-update/>
  26. BioSpace [Internet]. 2024 [cited 2024 Oct 2]. Aridis Provides Corporate Update - June 24, 2024. Available from: <https://www.biospace.com/aridis-provides-corporate-update-june-24-2024>
  27. R Core Team (2023). R: A Language and Environment for Statistical Computing. R

Foundation for Statistical Computing. Vienna, Austria.

28. Kassambara A, Mundt F. factoextra: Extract and Visualize the Results of Multivariate Data Analyses. 2020 [cited 2024 June 20]. Available from: <https://CRAN.R-project.org/package=factoextra>. R package version 1.0.7.
29. Carey VJ. gee: Generalized Estimation Equation Solver, 2022 [cited 2024 June 20]. Available from: <https://CRAN.R-project.org/package=gee>. R package version 4.13-25.
30. Thorndike RL. Who belongs in the family? Psychometrika. 1953;18(4):267–76.
31. Rousseeuw P. Silhouettes: A Graphical Aid to the Interpretation and Validation of Cluster Analysis. J Comput Appl Math. 1987 Nov 1;20:53–65.
32. Tibshirani R, Walther G, Hastie T. Estimating the Number of Clusters in a Data Set Via the Gap Statistic. Journal of the Royal Statistical Society Series B: Statistical Methodology. 2001 Jul 1;63(2):411–23.
33. Charrad M, Ghazzali N, Boiteau V, Niknafs A. NbClust: An R Package for Determining the Relevant Number of Clusters in a Data Set. Journal of Statistical Software. 2014 Nov 3;61:1–36.
